# Supplementary material
Source: PubMed Central journal article supplement (PMC5454276)
Supplement: rspb20170744supp1.pdf [file rspb20170744supp1.pdf]

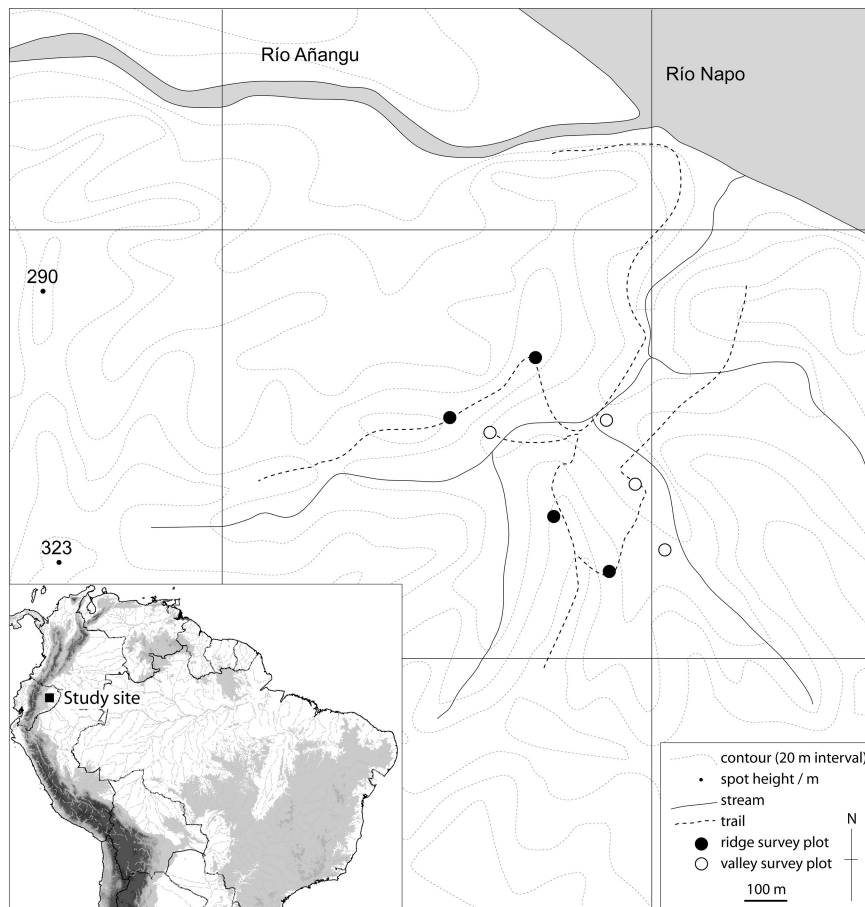

S1. Map showing the location of the study region within South America, and the location of sampling plots at the study site.

S2. Microhabitat distribution data for butterflies at Río Añangu study site, eastern Ecuador.

| Family      | Subfamily | Genus              | Species          | Authority          | Mimicry pattern | Flight height/m | Topography | Microhabitat | Number of individuals | Time        |
|-------------|-----------|--------------------|------------------|--------------------|-----------------|-----------------|------------|--------------|-----------------------|-------------|
| Nymphalidae | Danainae  | <i>Aeria</i>       | <i>eurimedia</i> | (Cramer, 1777)     | eurimedia       | 0.1             | valley     | valley0-1    | 1                     | 11:56:00 AM |
| Nymphalidae | Danainae  | <i>Aeria</i>       | <i>eurimedia</i> | (Cramer, 1777)     | eurimedia       | 0.5             | valley     | valley0-1    | 1                     | 10:15:00 AM |
| Nymphalidae | Danainae  | <i>Aeria</i>       | <i>eurimedia</i> | (Cramer, 1777)     | eurimedia       | 0.1             | ridge      | ridge0-1     | 1                     | 2:25:00 PM  |
| Nymphalidae | Danainae  | <i>Aeria</i>       | <i>eurimedia</i> | (Cramer, 1777)     | eurimedia       | 2               | valley     | valley2-3    | 1                     | 11:55:00 AM |
| Nymphalidae | Danainae  | <i>Aeria</i>       | <i>eurimedia</i> | (Cramer, 1777)     | eurimedia       | 0.5             | ridge      | ridge0-1     | 1                     | 11:05:00 AM |
| Nymphalidae | Danainae  | <i>Aeria</i>       | <i>eurimedia</i> | (Cramer, 1777)     | eurimedia       | 0.5             | ridge      | ridge0-1     | 1                     | 12:15:00 PM |
| Nymphalidae | Danainae  | <i>Aeria</i>       | <i>eurimedia</i> | (Cramer, 1777)     | eurimedia       | 0.3             | valley     | valley0-1    | 1                     | 1:25:00 PM  |
| Nymphalidae | Danainae  | <i>Aeria</i>       | <i>eurimedia</i> | (Cramer, 1777)     | eurimedia       | 0.2             | valley     | valley0-1    | 1                     | 2:35:00 PM  |
| Nymphalidae | Danainae  | <i>Brevioleria</i> | <i>arzalia</i>   | (Hewitson, 1876)   | aureliana       | 0.5             | valley     | valley0-1    | 1                     | 9:20:00 AM  |
| Nymphalidae | Danainae  | <i>Brevioleria</i> | <i>arzalia</i>   | (Hewitson, 1876)   | aureliana       | 1               | valley     | valley1-2    | 1                     | 8:55:00 AM  |
| Nymphalidae | Danainae  | <i>Brevioleria</i> | <i>arzalia</i>   | (Hewitson, 1876)   | aureliana       | 0.3             | ridge      | ridge0-1     | 1                     | 3:20:00 PM  |
| Nymphalidae | Danainae  | <i>Brevioleria</i> | <i>arzalia</i>   | (Hewitson, 1876)   | aureliana       | 1.2             | ridge      | ridge1-2     | 1                     | 4:30:00 PM  |
| Nymphalidae | Danainae  | <i>Brevioleria</i> | <i>seba</i>      | (Hewitson, 1872)   | aureliana       | 0.5             | valley     | valley0-1    | 1                     | 1:48:00 PM  |
| Nymphalidae | Danainae  | <i>Brevioleria</i> | <i>seba</i>      | (Hewitson, 1872)   | aureliana       | 0.2             | ridge      | ridge0-1     | 1                     | 10:45:00 AM |
| Nymphalidae | Danainae  | <i>Callithomia</i> | <i>lenea</i>     | (Cramer, 1780)     | confusa         | 3               | ridge      | ridge>3      | 1                     | 3:20:00 PM  |
| Nymphalidae | Danainae  | <i>Callithomia</i> | <i>lenea</i>     | (Cramer, 1780)     | confusa         | 1.2             | ridge      | ridge1-2     | 1                     | 12:54:00 PM |
| Nymphalidae | Danainae  | <i>Callithomia</i> | <i>lenea</i>     | (Cramer, 1780)     | confusa         | 0.5             | valley     | valley0-1    | 1                     | 1:05:00 PM  |
| Nymphalidae | Danainae  | <i>Callithomia</i> | <i>lenea</i>     | (Cramer, 1780)     | confusa         | 1.5             | valley     | valley1-2    | 1                     | 11:30:00 AM |
| Nymphalidae | Danainae  | <i>Callithomia</i> | <i>lenea</i>     | (Cramer, 1780)     | confusa         | 1               | ridge      | ridge1-2     | 1                     | 10:05:00 AM |
| Nymphalidae | Danainae  | <i>Callithomia</i> | <i>lenea</i>     | (Cramer, 1780)     | confusa         | 0.5             | ridge      | ridge0-1     | 1                     | 10:25:00 AM |
| Nymphalidae | Danainae  | <i>Callithomia</i> | <i>lenea</i>     | (Cramer, 1780)     | confusa         | 1               | ridge      | ridge1-2     | 1                     | 11:00:00 AM |
| Nymphalidae | Danainae  | <i>Ceratinia</i>   | <i>tutia</i>     | (Hewitson, 1852)   | hermias         | 2               | valley     | valley2-3    | 1                     | 11:54:00 AM |
| Nymphalidae | Danainae  | <i>Ceratinia</i>   | <i>tutia</i>     | (Hewitson, 1852)   | hermias         | 1               | valley     | valley1-2    | 1                     | 12:02:00 PM |
| Nymphalidae | Danainae  | <i>Ceratinia</i>   | <i>tutia</i>     | (Hewitson, 1852)   | hermias         | 1.5             | ridge      | ridge1-2     | 1                     | 10:45:00 AM |
| Nymphalidae | Danainae  | <i>Ceratinia</i>   | <i>tutia</i>     | (Hewitson, 1852)   | hermias         | 2.5             | ridge      | ridge2-3     | 1                     | 10:49:00 AM |
| Nymphalidae | Danainae  | <i>Ceratinia</i>   | <i>tutia</i>     | (Hewitson, 1852)   | hermias         | 7               | ridge      | ridge>3      | 1                     | 2:40:00 PM  |
| Nymphalidae | Danainae  | <i>Ceratinia</i>   | <i>tutia</i>     | (Hewitson, 1852)   | hermias         | 1               | ridge      | ridge1-2     | 1                     | 2:44:00 PM  |
| Nymphalidae | Danainae  | <i>Ceratinia</i>   | <i>tutia</i>     | (Hewitson, 1852)   | hermias         | 5               | ridge      | ridge>3      | 1                     | 2:59:00 PM  |
| Nymphalidae | Danainae  | <i>Ceratinia</i>   | <i>tutia</i>     | (Hewitson, 1852)   | hermias         | 0.3             | valley     | valley0-1    | 1                     | 10:59:00 AM |
| Nymphalidae | Danainae  | <i>Ceratinia</i>   | <i>tutia</i>     | (Hewitson, 1852)   | hermias         | 1.5             | ridge      | ridge1-2     | 1                     | 11:31:00 AM |
| Nymphalidae | Danainae  | <i>Ceratinia</i>   | <i>tutia</i>     | (Hewitson, 1852)   | hermias         | 5               | ridge      | ridge>3      | 1                     | 12:24:00 PM |
| Nymphalidae | Danainae  | <i>Ceratinia</i>   | <i>tutia</i>     | (Hewitson, 1852)   | hermias         | 1               | ridge      | ridge1-2     | 1                     | 10:30:00 AM |
| Nymphalidae | Danainae  | <i>Ceratinia</i>   | <i>tutia</i>     | (Hewitson, 1852)   | hermias         | 1               | ridge      | ridge1-2     | 1                     | 10:41:00 AM |
| Nymphalidae | Danainae  | <i>Ceratinia</i>   | <i>tutia</i>     | (Hewitson, 1852)   | hermias         | 1               | valley     | valley1-2    | 1                     | 11:50:00 AM |
| Nymphalidae | Danainae  | <i>Ceratinia</i>   | <i>tutia</i>     | (Hewitson, 1852)   | hermias         | 3               | ridge      | ridge>3      | 1                     | 2:50:00 PM  |
| Nymphalidae | Danainae  | <i>Ceratinia</i>   | <i>tutia</i>     | (Hewitson, 1852)   | hermias         | 0.7             | ridge      | ridge0-1     | 1                     | 11:30:00 AM |
| Nymphalidae | Danainae  | <i>Ceratinia</i>   | <i>tutia</i>     | (Hewitson, 1852)   | hermias         | 0.5             | ridge      | ridge0-1     | 1                     | 11:40:00 AM |
| Nymphalidae | Danainae  | <i>Ceratinia</i>   | <i>tutia</i>     | (Hewitson, 1852)   | hermias         | 0.4             | valley     | valley0-1    | 1                     | 10:46:00 AM |
| Nymphalidae | Danainae  | <i>Ceratinia</i>   | <i>tutia</i>     | (Hewitson, 1852)   | hermias         | 2               | valley     | valley2-3    | 1                     | 10:50:00 AM |
| Nymphalidae | Danainae  | <i>Ceratinia</i>   | <i>tutia</i>     | (Hewitson, 1852)   | hermias         | 1.5             | valley     | valley1-2    | 1                     | 10:50:00 AM |
| Nymphalidae | Danainae  | <i>Ceratinia</i>   | <i>tutia</i>     | (Hewitson, 1852)   | hermias         | 0.3             | ridge      | ridge0-1     | 1                     | 11:35:00 AM |
| Nymphalidae | Danainae  | <i>Ceratinia</i>   | <i>tutia</i>     | (Hewitson, 1852)   | hermias         | 1               | ridge      | ridge1-2     | 1                     | 11:40:00 AM |
| Nymphalidae | Danainae  | <i>Ceratinia</i>   | <i>tutia</i>     | (Hewitson, 1852)   | hermias         | 1               | ridge      | ridge1-2     | 1                     | 12:15:00 PM |
| Nymphalidae | Danainae  | <i>Ceratinia</i>   | <i>tutia</i>     | (Hewitson, 1852)   | hermias         | 0.4             | ridge      | ridge0-1     | 1                     | 10:50:00 AM |
| Nymphalidae | Danainae  | <i>Ceratinia</i>   | <i>tutia</i>     | (Hewitson, 1852)   | hermias         | 0.2             | ridge      | ridge0-1     | 1                     | 10:50:00 AM |
| Nymphalidae | Danainae  | <i>Ceratinia</i>   | <i>tutia</i>     | (Hewitson, 1852)   | hermias         | 0.7             | ridge      | ridge0-1     | 1                     | 2:45:00 PM  |
| Nymphalidae | Danainae  | <i>Ceratinia</i>   | <i>tutia</i>     | (Hewitson, 1852)   | hermias         | 1.6             | valley     | valley1-2    | 1                     | 2:10:00 PM  |
| Nymphalidae | Danainae  | <i>Episcada</i>    | <i>sulphurea</i> | Haensch, 1905      | eurimedia       | 1               | ridge      | ridge1-2     | 1                     | 10:52:00 AM |
| Nymphalidae | Danainae  | <i>Forbestra</i>   | <i>olivencia</i> | (H.W. Bates, 1862) | hermias         | 0.5             | valley     | valley0-1    | 1                     | 12:45:00 PM |
| Nymphalidae | Danainae  | <i>Forbestra</i>   | <i>olivencia</i> | (H.W. Bates, 1862) | hermias         | 1               | ridge      | ridge1-2     | 1                     | 10:15:00 AM |
| Nymphalidae | Danainae  | <i>Forbestra</i>   | <i>olivencia</i> | (H.W. Bates, 1862) | hermias         | 1               | ridge      | ridge1-2     | 1                     | 10:15:00 AM |
| Nymphalidae | Danainae  | <i>Forbestra</i>   | <i>olivencia</i> | (H.W. Bates, 1862) | hermias         | 1               | ridge      | ridge1-2     | 1                     | 12:29:00 PM |
| Nymphalidae | Danainae  | <i>Forbestra</i>   | <i>olivencia</i> | (H.W. Bates, 1862) | hermias         | 1.5             | ridge      | ridge1-2     | 1                     | 12:01:00 PM |
| Nymphalidae | Danainae  | <i>Forbestra</i>   | <i>olivencia</i> | (H.W. Bates, 1862) | hermias         | 2               | ridge      | ridge2-3     | 1                     | 12:02:00 PM |
| Nymphalidae | Danainae  | <i>Forbestra</i>   | <i>olivencia</i> | (H.W. Bates, 1862) | hermias         | 0.3             | ridge      | ridge0-1     | 1                     | 12:20:00 PM |
| Nymphalidae | Danainae  | <i>Forbestra</i>   | <i>olivencia</i> | (H.W. Bates, 1862) | hermias         | 0.4             | ridge      | ridge0-1     | 1                     | 12:42:00 PM |
| Nymphalidae | Danainae  | <i>Forbestra</i>   | <i>olivencia</i> | (H.W. Bates, 1862) | hermias         | 0.5             | ridge      | ridge0-1     | 1                     | 10:40:00 AM |
| Nymphalidae | Danainae  | <i>Godyris</i>     | <i>zavaleta</i>  | (Hewitson, [1855]) | eurimedia       | 1.5             | valley     | valley1-2    | 1                     | 8:50:00 AM  |
| Nymphalidae | Danainae  | <i>Godyris</i>     | <i>zavaleta</i>  | (Hewitson, [1855]) | eurimedia       | 1.8             | valley     | valley1-2    | 1                     | 8:52:00 AM  |
| Nymphalidae | Danainae  | <i>Godyris</i>     | <i>zavaleta</i>  | (Hewitson, [1855]) | eurimedia       | 1.3             | valley     | valley1-2    | 1                     | 8:54:00 AM  |
| Nymphalidae | Danainae  | <i>Godyris</i>     | <i>zavaleta</i>  | (Hewitson, [1855]) | eurimedia       | 2               | valley     | valley2-3    | 1                     | 8:58:00 AM  |
| Nymphalidae | Danainae  | <i>Godyris</i>     | <i>zavaleta</i>  | (Hewitson, [1855]) | eurimedia       | 1.2             | valley     | valley1-2    | 1                     | 9:20:00 AM  |
| Nymphalidae | Danainae  | <i>Godyris</i>     | <i>zavaleta</i>  | (Hewitson, [1855]) | eurimedia       | 1.2             | valley     | valley1-2    | 1                     | 9:20:00 AM  |
| Nymphalidae | Danainae  | <i>Godyris</i>     | <i>zavaleta</i>  | (Hewitson, [1855]) | eurimedia       | 1.7             | valley     | valley1-2    | 1                     | 9:20:00 AM  |
| Nymphalidae | Danainae  | <i>Godyris</i>     | <i>zavaleta</i>  | (Hewitson, [1855]) | eurimedia       | 1               | valley     | valley1-2    | 1                     | 8:36:00 AM  |
| Nymphalidae | Danainae  | <i>Godyris</i>     | <i>zavaleta</i>  | (Hewitson, [1855]) | eurimedia       | 1.5             | valley     | valley1-2    | 1                     | 12:15:00 PM |
| Nymphalidae | Danainae  | <i>Godyris</i>     | <i>zavaleta</i>  | (Hewitson, [1855]) | eurimedia       | 1               | valley     | valley1-2    | 1                     | 10:50:00 AM |
| Nymphalidae | Danainae  | <i>Godyris</i>     | <i>zavaleta</i>  | (Hewitson, [1855]) | eurimedia       | 1.5             | valley     | valley1-2    | 1                     | 10:05:00 AM |
| Nymphalidae | Danainae  | <i>Godyris</i>     | <i>zavaleta</i>  | (Hewitson, [1855]) | eurimedia       | 0.7             | valley     | valley0-1    | 1                     | 10:31:00 AM |
| Nymphalidae | Danainae  | <i>Godyris</i>     | <i>zavaleta</i>  | (Hewitson, [1855]) | eurimedia       | 2               | ridge      | ridge2-3     | 1                     | 12:23:00 PM |
| Nymphalidae | Danainae  | <i>Godyris</i>     | <i>zavaleta</i>  | (Hewitson, [1855]) | eurimedia       | 2               | ridge      | ridge2-3     | 1                     | 12:29:00 PM |

| Family      | Subfamily | Genus            | Species         | Authority          | Mimicry pattern | Flight height/m | Topography | Microhabitat | Number of individuals | Time        |
|-------------|-----------|------------------|-----------------|--------------------|-----------------|-----------------|------------|--------------|-----------------------|-------------|
| Nymphalidae | Danainae  | <i>Godyris</i>   | <i>zavaleta</i> | (Hewitson, [1855]) | eurimedia       | 0.2             | valley     | valley0-1    | 1                     | 12:00:00 PM |
| Nymphalidae | Danainae  | <i>Godyris</i>   | <i>zavaleta</i> | (Hewitson, [1855]) | eurimedia       | 2               | valley     | valley2-3    | 1                     | 11:12:00 AM |
| Nymphalidae | Danainae  | <i>Godyris</i>   | <i>zavaleta</i> | (Hewitson, [1855]) | eurimedia       | 0.5             | valley     | valley0-1    | 1                     | 1:58:00 PM  |
| Nymphalidae | Danainae  | <i>Godyris</i>   | <i>zavaleta</i> | (Hewitson, [1855]) | eurimedia       | 1.5             | valley     | valley1-2    | 1                     | 2:00:00 PM  |
| Nymphalidae | Danainae  | <i>Godyris</i>   | <i>zavaleta</i> | (Hewitson, [1855]) | eurimedia       | 0.5             | ridge      | ridge0-1     | 1                     | 3:30:00 PM  |
| Nymphalidae | Danainae  | <i>Godyris</i>   | <i>zavaleta</i> | (Hewitson, [1855]) | eurimedia       | 1.2             | valley     | valley1-2    | 1                     | 11:15:00 AM |
| Nymphalidae | Danainae  | <i>Godyris</i>   | <i>zavaleta</i> | (Hewitson, [1855]) | eurimedia       | 2               | ridge      | ridge2-3     | 1                     | 9:30:00 AM  |
| Nymphalidae | Danainae  | <i>Godyris</i>   | <i>zavaleta</i> | (Hewitson, [1855]) | eurimedia       | 1.2             | ridge      | ridge1-2     | 1                     | 9:45:00 AM  |
| Nymphalidae | Danainae  | <i>Godyris</i>   | <i>zavaleta</i> | (Hewitson, [1855]) | eurimedia       | 1               | ridge      | ridge1-2     | 1                     | 10:30:00 AM |
| Nymphalidae | Danainae  | <i>Godyris</i>   | <i>zavaleta</i> | (Hewitson, [1855]) | eurimedia       | 1.5             | ridge      | ridge1-2     | 1                     | 10:30:00 AM |
| Nymphalidae | Danainae  | <i>Godyris</i>   | <i>zavaleta</i> | (Hewitson, [1855]) | eurimedia       | 1               | ridge      | ridge1-2     | 1                     | 10:00:00 AM |
| Nymphalidae | Danainae  | <i>Godyris</i>   | <i>zavaleta</i> | (Hewitson, [1855]) | eurimedia       | 1               | valley     | valley1-2    | 1                     | 12:20:00 PM |
| Nymphalidae | Danainae  | <i>Godyris</i>   | <i>zavaleta</i> | (Hewitson, [1855]) | eurimedia       | 1               | valley     | valley1-2    | 1                     | 12:20:00 PM |
| Nymphalidae | Danainae  | <i>Godyris</i>   | <i>zavaleta</i> | (Hewitson, [1855]) | eurimedia       | 0.5             | valley     | valley0-1    | 1                     | 12:45:00 PM |
| Nymphalidae | Danainae  | <i>Godyris</i>   | <i>zavaleta</i> | (Hewitson, [1855]) | eurimedia       | 1               | valley     | valley1-2    | 1                     | 1:05:00 PM  |
| Nymphalidae | Danainae  | <i>Godyris</i>   | <i>zavaleta</i> | (Hewitson, [1855]) | eurimedia       | 2               | valley     | valley2-3    | 1                     | 1:05:00 PM  |
| Nymphalidae | Danainae  | <i>Godyris</i>   | <i>zavaleta</i> | (Hewitson, [1855]) | eurimedia       | 1.5             | valley     | valley1-2    | 1                     | 3:45:00 PM  |
| Nymphalidae | Danainae  | <i>Godyris</i>   | <i>zavaleta</i> | (Hewitson, [1855]) | eurimedia       | 1.5             | valley     | valley1-2    | 1                     | 3:45:00 PM  |
| Nymphalidae | Danainae  | <i>Godyris</i>   | <i>zavaleta</i> | (Hewitson, [1855]) | eurimedia       | 1               | valley     | valley1-2    | 1                     | 3:50:00 PM  |
| Nymphalidae | Danainae  | <i>Godyris</i>   | <i>zavaleta</i> | (Hewitson, [1855]) | eurimedia       | 0.7             | valley     | valley0-1    | 1                     | 3:50:00 PM  |
| Nymphalidae | Danainae  | <i>Godyris</i>   | <i>zavaleta</i> | (Hewitson, [1855]) | eurimedia       | 1               | valley     | valley1-2    | 1                     | 11:50:00 AM |
| Nymphalidae | Danainae  | <i>Godyris</i>   | <i>zavaleta</i> | (Hewitson, [1855]) | eurimedia       | 1.7             | valley     | valley1-2    | 1                     | 11:50:00 AM |
| Nymphalidae | Danainae  | <i>Godyris</i>   | <i>zavaleta</i> | (Hewitson, [1855]) | eurimedia       | 1               | valley     | valley1-2    | 1                     | 12:00:00 PM |
| Nymphalidae | Danainae  | <i>Godyris</i>   | <i>zavaleta</i> | (Hewitson, [1855]) | eurimedia       | 1.5             | valley     | valley1-2    | 1                     | 12:35:00 PM |
| Nymphalidae | Danainae  | <i>Godyris</i>   | <i>zavaleta</i> | (Hewitson, [1855]) | eurimedia       | 1.5             | valley     | valley1-2    | 1                     | 10:35:00 AM |
| Nymphalidae | Danainae  | <i>Godyris</i>   | <i>zavaleta</i> | (Hewitson, [1855]) | eurimedia       | 1.3             | ridge      | ridge1-2     | 1                     | 12:25:00 PM |
| Nymphalidae | Danainae  | <i>Godyris</i>   | <i>zavaleta</i> | (Hewitson, [1855]) | eurimedia       | 2               | valley     | valley2-3    | 1                     | 3:40:00 PM  |
| Nymphalidae | Danainae  | <i>Godyris</i>   | <i>zavaleta</i> | (Hewitson, [1855]) | eurimedia       | 2               | valley     | valley2-3    | 1                     | 3:40:00 PM  |
| Nymphalidae | Danainae  | <i>Godyris</i>   | <i>zavaleta</i> | (Hewitson, [1855]) | eurimedia       | 1.5             | ridge      | ridge1-2     | 1                     | 4:37:00 PM  |
| Nymphalidae | Danainae  | <i>Godyris</i>   | <i>zavaleta</i> | (Hewitson, [1855]) | eurimedia       | 1               | valley     | valley1-2    | 1                     | 10:50:00 AM |
| Nymphalidae | Danainae  | <i>Godyris</i>   | <i>zavaleta</i> | (Hewitson, [1855]) | eurimedia       | 1.2             | valley     | valley1-2    | 1                     | 1:40:00 PM  |
| Nymphalidae | Danainae  | <i>Godyris</i>   | <i>zavaleta</i> | (Hewitson, [1855]) | eurimedia       | 1.6             | ridge      | ridge1-2     | 1                     | 2:30:00 PM  |
| Nymphalidae | Danainae  | <i>Godyris</i>   | <i>zavaleta</i> | (Hewitson, [1855]) | eurimedia       | 1.5             | valley     | valley1-2    | 1                     | 9:23:00 AM  |
| Nymphalidae | Danainae  | <i>Godyris</i>   | <i>zavaleta</i> | (Hewitson, [1855]) | eurimedia       | 1.5             | valley     | valley1-2    | 1                     | 9:25:00 AM  |
| Nymphalidae | Danainae  | <i>Godyris</i>   | <i>zavaleta</i> | (Hewitson, [1855]) | eurimedia       | 2               | valley     | valley2-3    | 1                     | 9:30:00 AM  |
| Nymphalidae | Danainae  | <i>Godyris</i>   | <i>zavaleta</i> | (Hewitson, [1855]) | eurimedia       | 2               | valley     | valley2-3    | 1                     | 9:40:00 AM  |
| Nymphalidae | Danainae  | <i>Godyris</i>   | <i>zavaleta</i> | (Hewitson, [1855]) | eurimedia       | 1               | valley     | valley1-2    | 1                     | 12:35:00 PM |
| Nymphalidae | Danainae  | <i>Godyris</i>   | <i>zavaleta</i> | (Hewitson, [1855]) | eurimedia       | 1.5             | valley     | valley1-2    | 1                     | 11:15:00 AM |
| Nymphalidae | Danainae  | <i>Godyris</i>   | <i>zavaleta</i> | (Hewitson, [1855]) | eurimedia       | 1               | valley     | valley1-2    | 1                     | 3:40:00 PM  |
| Nymphalidae | Danainae  | <i>Godyris</i>   | <i>zavaleta</i> | (Hewitson, [1855]) | eurimedia       | 1               | valley     | valley1-2    | 1                     | 3:50:00 PM  |
| Nymphalidae | Danainae  | <i>Godyris</i>   | <i>zavaleta</i> | (Hewitson, [1855]) | eurimedia       | 1.4             | valley     | valley1-2    | 1                     | 4:00:00 PM  |
| Nymphalidae | Danainae  | <i>Godyris</i>   | <i>zavaleta</i> | (Hewitson, [1855]) | eurimedia       | 2               | valley     | valley2-3    | 1                     | 4:15:00 PM  |
| Nymphalidae | Danainae  | <i>Godyris</i>   | <i>zavaleta</i> | (Hewitson, [1855]) | eurimedia       | 4               | valley     | valley>3     | 1                     | 2:25:00 PM  |
| Nymphalidae | Danainae  | <i>Godyris</i>   | <i>zavaleta</i> | (Hewitson, [1855]) | eurimedia       | 1               | valley     | valley1-2    | 1                     | 2:35:00 PM  |
| Nymphalidae | Danainae  | <i>Godyris</i>   | <i>zavaleta</i> | (Hewitson, [1855]) | eurimedia       | 1.5             | valley     | valley1-2    | 1                     | 3:15:00 PM  |
| Nymphalidae | Danainae  | <i>Godyris</i>   | <i>zavaleta</i> | (Hewitson, [1855]) | eurimedia       | 0.3             | ridge      | ridge0-1     | 1                     | 10:40:00 AM |
| Nymphalidae | Danainae  | <i>Godyris</i>   | <i>zavaleta</i> | (Hewitson, [1855]) | eurimedia       | 0.5             | valley     | valley0-1    | 1                     | 11:45:00 AM |
| Nymphalidae | Danainae  | <i>Godyris</i>   | <i>zavaleta</i> | (Hewitson, [1855]) | eurimedia       | 1               | ridge      | ridge1-2     | 1                     | 10:10:00 AM |
| Nymphalidae | Danainae  | <i>Godyris</i>   | <i>zavaleta</i> | (Hewitson, [1855]) | eurimedia       | 1               | valley     | valley1-2    | 1                     | 12:20:00 PM |
| Nymphalidae | Danainae  | <i>Godyris</i>   | <i>zavaleta</i> | (Hewitson, [1855]) | eurimedia       | 0.8             | valley     | valley0-1    | 1                     | 12:35:00 PM |
| Nymphalidae | Danainae  | <i>Godyris</i>   | <i>zavaleta</i> | (Hewitson, [1855]) | eurimedia       | 0.7             | valley     | valley0-1    | 1                     | 12:06:00 PM |
| Nymphalidae | Danainae  | <i>Hyalyris</i>  | n. sp.          | Willmott & Lamas   | hermias         | 2               | valley     | valley2-3    | 1                     | 4:50:00 PM  |
| Nymphalidae | Danainae  | <i>Hyalyris</i>  | n. sp.          | Willmott & Lamas   | hermias         | 3.5             | valley     | valley>3     | 1                     | 3:40:00 PM  |
| Nymphalidae | Danainae  | <i>Hypoleria</i> | <i>alema</i>    | (Hewitson, [1857]) | aureliana       | 1.8             | valley     | valley1-2    | 1                     | 8:50:00 AM  |
| Nymphalidae | Danainae  | <i>Hypoleria</i> | <i>alema</i>    | (Hewitson, [1857]) | aureliana       | 1               | valley     | valley1-2    | 1                     | 8:54:00 AM  |
| Nymphalidae | Danainae  | <i>Hypoleria</i> | <i>alema</i>    | (Hewitson, [1857]) | aureliana       | 0.8             | valley     | valley0-1    | 1                     | 8:54:00 AM  |
| Nymphalidae | Danainae  | <i>Hypoleria</i> | <i>alema</i>    | (Hewitson, [1857]) | aureliana       | 0.8             | valley     | valley0-1    | 1                     | 8:39:00 AM  |
| Nymphalidae | Danainae  | <i>Hypoleria</i> | <i>alema</i>    | (Hewitson, [1857]) | aureliana       | 1.5             | valley     | valley1-2    | 1                     | 1:55:00 PM  |
| Nymphalidae | Danainae  | <i>Hypoleria</i> | <i>alema</i>    | (Hewitson, [1857]) | aureliana       | 1               | valley     | valley1-2    | 1                     | 10:20:00 AM |
| Nymphalidae | Danainae  | <i>Hypoleria</i> | <i>alema</i>    | (Hewitson, [1857]) | aureliana       | 2               | valley     | valley2-3    | 1                     | 10:25:00 AM |
| Nymphalidae | Danainae  | <i>Hypoleria</i> | <i>alema</i>    | (Hewitson, [1857]) | aureliana       | 0.5             | valley     | valley0-1    | 1                     | 10:50:00 AM |
| Nymphalidae | Danainae  | <i>Hypoleria</i> | <i>alema</i>    | (Hewitson, [1857]) | aureliana       | 1               | ridge      | ridge1-2     | 1                     | 12:10:00 PM |
| Nymphalidae | Danainae  | <i>Hypoleria</i> | <i>alema</i>    | (Hewitson, [1857]) | aureliana       | 1.3             | valley     | valley1-2    | 1                     | 2:25:00 PM  |
| Nymphalidae | Danainae  | <i>Hypoleria</i> | <i>alema</i>    | (Hewitson, [1857]) | aureliana       | 1               | ridge      | ridge1-2     | 1                     | 11:00:00 AM |
| Nymphalidae | Danainae  | <i>Hypoleria</i> | <i>alema</i>    | (Hewitson, [1857]) | aureliana       | 0.6             | valley     | valley0-1    | 1                     | 2:30:00 PM  |
| Nymphalidae | Danainae  | <i>Hypoleria</i> | <i>alema</i>    | (Hewitson, [1857]) | aureliana       | 1               | valley     | valley1-2    | 1                     | 9:05:00 AM  |
| Nymphalidae | Danainae  | <i>Hypoleria</i> | <i>alema</i>    | (Hewitson, [1857]) | aureliana       | 1               | valley     | valley1-2    | 1                     | 9:10:00 AM  |
| Nymphalidae | Danainae  | <i>Hypoleria</i> | <i>alema</i>    | (Hewitson, [1857]) | aureliana       | 1               | valley     | valley1-2    | 1                     | 9:10:00 AM  |
| Nymphalidae | Danainae  | <i>Hypoleria</i> | <i>alema</i>    | (Hewitson, [1857]) | aureliana       | 2               | valley     | valley2-3    | 1                     | 9:23:00 AM  |
| Nymphalidae | Danainae  | <i>Hypoleria</i> | <i>alema</i>    | (Hewitson, [1857]) | aureliana       | 1.2             | valley     | valley1-2    | 1                     | 4:10:00 PM  |
| Nymphalidae | Danainae  | <i>Hypoleria</i> | <i>alema</i>    | (Hewitson, [1857]) | aureliana       | 1               | valley     | valley1-2    | 1                     | 8:49:00 AM  |
| Nymphalidae | Danainae  | <i>Hyposcada</i> | <i>anchiala</i> | (Hewitson, 1868)   | hermias         | 0.5             | valley     | valley0-1    | 1                     | 10:00:00 AM |
| Nymphalidae | Danainae  | <i>Hyposcada</i> | <i>anchiala</i> | (Hewitson, 1868)   | hermias         | 1               | ridge      | ridge1-2     | 1                     | 9:35:00 AM  |

| Family      | Subfamily | Genus             | Species          | Authority          | Mimicry pattern | Flight height/m | Topography | Microhabitat | Number of individuals | Time        |
|-------------|-----------|-------------------|------------------|--------------------|-----------------|-----------------|------------|--------------|-----------------------|-------------|
| Nymphalidae | Danainae  | <i>Hyposcada</i>  | <i>anchiala</i>  | (Hewitson, 1868)   | hermias         | 1               | valley     | valley1-2    | 1                     | 12:40:00 PM |
| Nymphalidae | Danainae  | <i>Hyposcada</i>  | <i>anchiala</i>  | (Hewitson, 1868)   | hermias         | 1.5             | ridge      | ridge1-2     | 1                     | 11:45:00 AM |
| Nymphalidae | Danainae  | <i>Hyposcada</i>  | <i>anchiala</i>  | (Hewitson, 1868)   | hermias         | 0.8             | valley     | valley0-1    | 1                     | 1:20:00 PM  |
| Nymphalidae | Danainae  | <i>Hyposcada</i>  | <i>anchiala</i>  | (Hewitson, 1868)   | hermias         | 1.5             | ridge      | ridge1-2     | 1                     | 11:00:00 AM |
| Nymphalidae | Danainae  | <i>Hyposcada</i>  | <i>anchiala</i>  | (Hewitson, 1868)   | hermias         | 1               | valley     | valley1-2    | 1                     | 2:00:00 PM  |
| Nymphalidae | Danainae  | <i>Hyposcada</i>  | <i>anchiala</i>  | (Hewitson, 1868)   | hermias         | 0.2             | valley     | valley0-1    | 1                     | 11:40:00 AM |
| Nymphalidae | Danainae  | <i>Hyposcada</i>  | <i>anchiala</i>  | (Hewitson, 1868)   | hermias         | 1               | valley     | valley1-2    | 1                     | 9:18:00 AM  |
| Nymphalidae | Danainae  | <i>Hyposcada</i>  | <i>anchiala</i>  | (Hewitson, 1868)   | hermias         | 1               | valley     | valley1-2    | 1                     | 12:11:00 PM |
| Nymphalidae | Danainae  | <i>Hyposcada</i>  | <i>illinissa</i> | (Hewitson, [1852]) | lerida          | 0.4             | valley     | valley0-1    | 1                     | 9:20:00 AM  |
| Nymphalidae | Danainae  | <i>Hyposcada</i>  | <i>illinissa</i> | (Hewitson, [1852]) | lerida          | 0.3             | valley     | valley0-1    | 1                     | 9:20:00 AM  |
| Nymphalidae | Danainae  | <i>Hyposcada</i>  | <i>illinissa</i> | (Hewitson, [1852]) | lerida          | 0.4             | valley     | valley0-1    | 1                     | 8:42:00 AM  |
| Nymphalidae | Danainae  | <i>Hyposcada</i>  | <i>illinissa</i> | (Hewitson, [1852]) | lerida          | 0.7             | ridge      | ridge0-1     | 1                     | 11:10:00 AM |
| Nymphalidae | Danainae  | <i>Hyposcada</i>  | <i>illinissa</i> | (Hewitson, [1852]) | lerida          | 0.3             | ridge      | ridge0-1     | 1                     | 11:17:00 AM |
| Nymphalidae | Danainae  | <i>Hyposcada</i>  | <i>illinissa</i> | (Hewitson, [1852]) | lerida          | 0.5             | ridge      | ridge0-1     | 1                     | 12:40:00 PM |
| Nymphalidae | Danainae  | <i>Hyposcada</i>  | <i>illinissa</i> | (Hewitson, [1852]) | lerida          | 0.2             | valley     | valley0-1    | 1                     | 10:45:00 AM |
| Nymphalidae | Danainae  | <i>Hyposcada</i>  | <i>illinissa</i> | (Hewitson, [1852]) | lerida          | 0.3             | valley     | valley0-1    | 1                     | 10:09:00 AM |
| Nymphalidae | Danainae  | <i>Hyposcada</i>  | <i>illinissa</i> | (Hewitson, [1852]) | lerida          | 0.2             | ridge      | ridge0-1     | 1                     | 12:35:00 PM |
| Nymphalidae | Danainae  | <i>Hyposcada</i>  | <i>illinissa</i> | (Hewitson, [1852]) | lerida          | 1               | valley     | valley1-2    | 1                     | 3:30:00 PM  |
| Nymphalidae | Danainae  | <i>Hyposcada</i>  | <i>illinissa</i> | (Hewitson, [1852]) | lerida          | 1               | ridge      | ridge1-2     | 1                     | 4:40:00 PM  |
| Nymphalidae | Danainae  | <i>Hyposcada</i>  | <i>illinissa</i> | (Hewitson, [1852]) | lerida          | 0.3             | valley     | valley0-1    | 1                     | 11:50:00 AM |
| Nymphalidae | Danainae  | <i>Hyposcada</i>  | <i>illinissa</i> | (Hewitson, [1852]) | lerida          | 0.5             | valley     | valley0-1    | 1                     | 2:10:00 PM  |
| Nymphalidae | Danainae  | <i>Hyposcada</i>  | <i>illinissa</i> | (Hewitson, [1852]) | lerida          | 0.7             | valley     | valley0-1    | 1                     | 2:22:00 PM  |
| Nymphalidae | Danainae  | <i>Hyposcada</i>  | <i>illinissa</i> | (Hewitson, [1852]) | lerida          | 0.6             | valley     | valley0-1    | 1                     | 4:15:00 PM  |
| Nymphalidae | Danainae  | <i>Hyposcada</i>  | <i>illinissa</i> | (Hewitson, [1852]) | lerida          | 0.2             | valley     | valley0-1    | 1                     | 2:30:00 PM  |
| Nymphalidae | Danainae  | <i>Hyposcada</i>  | <i>illinissa</i> | (Hewitson, [1852]) | lerida          | 2.5             | valley     | valley2-3    | 1                     | 9:35:00 AM  |
| Nymphalidae | Danainae  | <i>Hyposcada</i>  | <i>illinissa</i> | (Hewitson, [1852]) | lerida          | 0.2             | valley     | valley0-1    | 1                     | 12:30:00 PM |
| Nymphalidae | Danainae  | <i>Hyposcada</i>  | <i>illinissa</i> | (Hewitson, [1852]) | lerida          | 0.3             | valley     | valley0-1    | 1                     | 12:26:00 PM |
| Nymphalidae | Danainae  | <i>Hypothyris</i> | <i>anastasia</i> | (H.W. Bates, 1862) | hermias         | 3               | ridge      | ridge>3      | 1                     | 10:00:00 AM |
| Nymphalidae | Danainae  | <i>Hypothyris</i> | <i>anastasia</i> | (H.W. Bates, 1862) | hermias         | 3               | valley     | valley>3     | 1                     | 3:15:00 PM  |
| Nymphalidae | Danainae  | <i>Hypothyris</i> | <i>anastasia</i> | (H.W. Bates, 1862) | hermias         | 2.5             | ridge      | ridge2-3     | 1                     | 11:40:00 AM |
| Nymphalidae | Danainae  | <i>Hypothyris</i> | <i>anastasia</i> | (H.W. Bates, 1862) | hermias         | 0.5             | ridge      | ridge0-1     | 1                     | 11:42:00 AM |
| Nymphalidae | Danainae  | <i>Hypothyris</i> | <i>euclaea</i>   | (Godart, 1819)     | hermias         | 0.8             | ridge      | ridge0-1     | 1                     | 9:30:00 AM  |
| Nymphalidae | Danainae  | <i>Hypothyris</i> | <i>fluonia</i>   | (Hewitson, 1854)   | hermias         | 2.5             | valley     | valley2-3    | 1                     | 8:28:00 AM  |
| Nymphalidae | Danainae  | <i>Hypothyris</i> | <i>fluonia</i>   | (Hewitson, 1854)   | hermias         | 1               | ridge      | ridge1-2     | 1                     | 12:34:00 PM |
| Nymphalidae | Danainae  | <i>Hypothyris</i> | <i>fluonia</i>   | (Hewitson, 1854)   | hermias         | 3               | ridge      | ridge>3      | 1                     | 12:05:00 PM |
| Nymphalidae | Danainae  | <i>Hypothyris</i> | <i>fluonia</i>   | (Hewitson, 1854)   | hermias         | 1               | ridge      | ridge1-2     | 1                     | 12:32:00 PM |
| Nymphalidae | Danainae  | <i>Hypothyris</i> | <i>fluonia</i>   | (Hewitson, 1854)   | hermias         | 2               | ridge      | ridge2-3     | 1                     | 3:20:00 PM  |
| Nymphalidae | Danainae  | <i>Hypothyris</i> | <i>fluonia</i>   | (Hewitson, 1854)   | hermias         | 1               | ridge      | ridge1-2     | 1                     | 4:00:00 PM  |
| Nymphalidae | Danainae  | <i>Hypothyris</i> | <i>fluonia</i>   | (Hewitson, 1854)   | hermias         | 1.5             | ridge      | ridge1-2     | 1                     | 9:30:00 AM  |
| Nymphalidae | Danainae  | <i>Hypothyris</i> | <i>fluonia</i>   | (Hewitson, 1854)   | hermias         | 2               | ridge      | ridge2-3     | 1                     | 9:50:00 AM  |
| Nymphalidae | Danainae  | <i>Hypothyris</i> | <i>fluonia</i>   | (Hewitson, 1854)   | hermias         | 1.5             | ridge      | ridge1-2     | 1                     | 10:05:00 AM |
| Nymphalidae | Danainae  | <i>Hypothyris</i> | <i>fluonia</i>   | (Hewitson, 1854)   | hermias         | 1               | ridge      | ridge1-2     | 1                     | 10:00:00 AM |
| Nymphalidae | Danainae  | <i>Hypothyris</i> | <i>fluonia</i>   | (Hewitson, 1854)   | hermias         | 0.2             | valley     | valley0-1    | 1                     | 1:05:00 PM  |
| Nymphalidae | Danainae  | <i>Hypothyris</i> | <i>fluonia</i>   | (Hewitson, 1854)   | hermias         | 1.5             | ridge      | ridge1-2     | 1                     | 12:35:00 PM |
| Nymphalidae | Danainae  | <i>Hypothyris</i> | <i>fluonia</i>   | (Hewitson, 1854)   | hermias         | 0.3             | ridge      | ridge0-1     | 1                     | 4:40:00 PM  |
| Nymphalidae | Danainae  | <i>Hypothyris</i> | <i>fluonia</i>   | (Hewitson, 1854)   | hermias         | 1.5             | valley     | valley1-2    | 1                     | 11:15:00 AM |
| Nymphalidae | Danainae  | <i>Hypothyris</i> | <i>fluonia</i>   | (Hewitson, 1854)   | hermias         | 1.5             | valley     | valley1-2    | 1                     | 1:45:00 PM  |
| Nymphalidae | Danainae  | <i>Hypothyris</i> | <i>fluonia</i>   | (Hewitson, 1854)   | hermias         | 0.5             | valley     | valley0-1    | 1                     | 11:00:00 AM |
| Nymphalidae | Danainae  | <i>Hypothyris</i> | <i>fluonia</i>   | (Hewitson, 1854)   | hermias         | 1               | ridge      | ridge1-2     | 1                     | 10:35:00 AM |
| Nymphalidae | Danainae  | <i>Hypothyris</i> | <i>mamercus</i>  | (Hewitson, 1869)   | mamercus        | 0.4             | valley     | valley0-1    | 1                     | 10:46:00 AM |
| Nymphalidae | Danainae  | <i>Hypothyris</i> | <i>mamercus</i>  | (Hewitson, 1869)   | mamercus        | 2               | valley     | valley2-3    | 1                     | 2:12:00 PM  |
| Nymphalidae | Danainae  | <i>Hypothyris</i> | <i>moebiusi</i>  | (Haensch, 1903)    | hermias         | 1.5             | valley     | valley1-2    | 1                     | 11:10:00 AM |
| Nymphalidae | Danainae  | <i>Hypothyris</i> | <i>semifulva</i> | (Salvin, 1869)     | hermias         | 1.5             | valley     | valley1-2    | 1                     | 8:54:00 AM  |
| Nymphalidae | Danainae  | <i>Hypothyris</i> | <i>semifulva</i> | (Salvin, 1869)     | hermias         | 1.5             | valley     | valley1-2    | 1                     | 8:54:00 AM  |
| Nymphalidae | Danainae  | <i>Hypothyris</i> | <i>semifulva</i> | (Salvin, 1869)     | hermias         | 1               | valley     | valley1-2    | 1                     | 8:59:00 AM  |
| Nymphalidae | Danainae  | <i>Hypothyris</i> | <i>semifulva</i> | (Salvin, 1869)     | hermias         | 0.5             | valley     | valley0-1    | 1                     | 9:11:00 AM  |
| Nymphalidae | Danainae  | <i>Hypothyris</i> | <i>semifulva</i> | (Salvin, 1869)     | hermias         | 1               | valley     | valley1-2    | 1                     | 9:20:00 AM  |
| Nymphalidae | Danainae  | <i>Hypothyris</i> | <i>semifulva</i> | (Salvin, 1869)     | hermias         | 1               | valley     | valley1-2    | 1                     | 9:20:00 AM  |
| Nymphalidae | Danainae  | <i>Hypothyris</i> | <i>semifulva</i> | (Salvin, 1869)     | hermias         | 1.5             | valley     | valley1-2    | 1                     | 9:20:00 AM  |
| Nymphalidae | Danainae  | <i>Hypothyris</i> | <i>semifulva</i> | (Salvin, 1869)     | hermias         | 0.5             | valley     | valley0-1    | 1                     | 12:39:00 PM |
| Nymphalidae | Danainae  | <i>Hypothyris</i> | <i>semifulva</i> | (Salvin, 1869)     | hermias         | 1               | valley     | valley1-2    | 1                     | 8:34:00 AM  |
| Nymphalidae | Danainae  | <i>Hypothyris</i> | <i>semifulva</i> | (Salvin, 1869)     | hermias         | 0.5             | valley     | valley0-1    | 1                     | 12:15:00 PM |
| Nymphalidae | Danainae  | <i>Hypothyris</i> | <i>semifulva</i> | (Salvin, 1869)     | hermias         | 1.2             | valley     | valley1-2    | 1                     | 10:35:00 AM |
| Nymphalidae | Danainae  | <i>Hypothyris</i> | <i>semifulva</i> | (Salvin, 1869)     | hermias         | 0.5             | valley     | valley0-1    | 1                     | 10:37:00 AM |
| Nymphalidae | Danainae  | <i>Hypothyris</i> | <i>semifulva</i> | (Salvin, 1869)     | hermias         | 1.5             | valley     | valley1-2    | 1                     | 10:51:00 AM |
| Nymphalidae | Danainae  | <i>Hypothyris</i> | <i>semifulva</i> | (Salvin, 1869)     | hermias         | 1.5             | valley     | valley1-2    | 1                     | 11:05:00 AM |
| Nymphalidae | Danainae  | <i>Hypothyris</i> | <i>semifulva</i> | (Salvin, 1869)     | hermias         | 0.8             | valley     | valley0-1    | 1                     | 1:32:00 PM  |
| Nymphalidae | Danainae  | <i>Hypothyris</i> | <i>semifulva</i> | (Salvin, 1869)     | hermias         | 1.5             | valley     | valley1-2    | 1                     | 2:00:00 PM  |
| Nymphalidae | Danainae  | <i>Hypothyris</i> | <i>semifulva</i> | (Salvin, 1869)     | hermias         | 0.5             | valley     | valley0-1    | 1                     | 2:40:00 PM  |
| Nymphalidae | Danainae  | <i>Hypothyris</i> | <i>semifulva</i> | (Salvin, 1869)     | hermias         | 1.7             | valley     | valley1-2    | 1                     | 9:10:00 AM  |
| Nymphalidae | Danainae  | <i>Hypothyris</i> | <i>semifulva</i> | (Salvin, 1869)     | hermias         | 1               | valley     | valley1-2    | 1                     | 11:00:00 AM |
| Nymphalidae | Danainae  | <i>Hypothyris</i> | <i>semifulva</i> | (Salvin, 1869)     | hermias         | 1               | valley     | valley1-2    | 1                     | 11:00:00 AM |
| Nymphalidae | Danainae  | <i>Hypothyris</i> | <i>semifulva</i> | (Salvin, 1869)     | hermias         | 2               | valley     | valley2-3    | 1                     | 3:00:00 PM  |



| Family      | Subfamily | Genus             | Species           | Authority         | Mimicry pattern | Flight height/m | Topography | Microhabitat | Number of individuals | Time        |
|-------------|-----------|-------------------|-------------------|-------------------|-----------------|-----------------|------------|--------------|-----------------------|-------------|
| Nymphalidae | Danainae  | <i>Ithomia</i>    | <i>amarilla</i>   | Haensch, 1903     | eurimidia       | 0.8             | valley     | valley0-1    | 1                     | 4:00:00 PM  |
| Nymphalidae | Danainae  | <i>Ithomia</i>    | <i>amarilla</i>   | Haensch, 1903     | eurimidia       | 0.5             | valley     | valley0-1    | 1                     | 4:00:00 PM  |
| Nymphalidae | Danainae  | <i>Ithomia</i>    | <i>amarilla</i>   | Haensch, 1903     | eurimidia       | 1               | valley     | valley1-2    | 1                     | 4:05:00 PM  |
| Nymphalidae | Danainae  | <i>Ithomia</i>    | <i>amarilla</i>   | Haensch, 1903     | eurimidia       | 1.5             | valley     | valley1-2    | 1                     | 4:15:00 PM  |
| Nymphalidae | Danainae  | <i>Ithomia</i>    | <i>amarilla</i>   | Haensch, 1903     | eurimidia       | 1.5             | valley     | valley1-2    | 1                     | 4:22:00 PM  |
| Nymphalidae | Danainae  | <i>Ithomia</i>    | <i>amarilla</i>   | Haensch, 1903     | eurimidia       | 1.2             | valley     | valley1-2    | 1                     | 4:25:00 PM  |
| Nymphalidae | Danainae  | <i>Ithomia</i>    | <i>amarilla</i>   | Haensch, 1903     | eurimidia       | 1               | valley     | valley1-2    | 1                     | 4:25:00 PM  |
| Nymphalidae | Danainae  | <i>Ithomia</i>    | <i>amarilla</i>   | Haensch, 1903     | eurimidia       | 1               | valley     | valley1-2    | 1                     | 12:00:00 PM |
| Nymphalidae | Danainae  | <i>Ithomia</i>    | <i>amarilla</i>   | Haensch, 1903     | eurimidia       | 1               | valley     | valley1-2    | 1                     | 12:05:00 PM |
| Nymphalidae | Danainae  | <i>Ithomia</i>    | <i>amarilla</i>   | Haensch, 1903     | eurimidia       | 1               | valley     | valley1-2    | 1                     | 10:15:00 AM |
| Nymphalidae | Danainae  | <i>Ithomia</i>    | <i>amarilla</i>   | Haensch, 1903     | eurimidia       | 0.5             | valley     | valley0-1    | 1                     | 10:35:00 AM |
| Nymphalidae | Danainae  | <i>Ithomia</i>    | <i>amarilla</i>   | Haensch, 1903     | eurimidia       | 0.5             | valley     | valley0-1    | 1                     | 10:45:00 AM |
| Nymphalidae | Danainae  | <i>Ithomia</i>    | <i>amarilla</i>   | Haensch, 1903     | eurimidia       | 0.5             | valley     | valley0-1    | 1                     | 2:20:00 PM  |
| Nymphalidae | Danainae  | <i>Ithomia</i>    | <i>amarilla</i>   | Haensch, 1903     | eurimidia       | 0.5             | valley     | valley0-1    | 1                     | 2:40:00 PM  |
| Nymphalidae | Danainae  | <i>Ithomia</i>    | <i>amarilla</i>   | Haensch, 1903     | eurimidia       | 0.7             | valley     | valley0-1    | 1                     | 2:50:00 PM  |
| Nymphalidae | Danainae  | <i>Ithomia</i>    | <i>amarilla</i>   | Haensch, 1903     | eurimidia       | 0.5             | valley     | valley0-1    | 1                     | 3:15:00 PM  |
| Nymphalidae | Danainae  | <i>Ithomia</i>    | <i>amarilla</i>   | Haensch, 1903     | eurimidia       | 0.5             | valley     | valley0-1    | 1                     | 3:40:00 PM  |
| Nymphalidae | Danainae  | <i>Ithomia</i>    | <i>amarilla</i>   | Haensch, 1903     | eurimidia       | 1.5             | valley     | valley1-2    | 1                     | 3:50:00 PM  |
| Nymphalidae | Danainae  | <i>Ithomia</i>    | <i>amarilla</i>   | Haensch, 1903     | eurimidia       | 1               | valley     | valley1-2    | 1                     | 3:50:00 PM  |
| Nymphalidae | Danainae  | <i>Ithomia</i>    | <i>amarilla</i>   | Haensch, 1903     | eurimidia       | 0.7             | ridge      | ridge0-1     | 1                     | 4:20:00 PM  |
| Nymphalidae | Danainae  | <i>Ithomia</i>    | <i>amarilla</i>   | Haensch, 1903     | eurimidia       | 0.5             | valley     | valley0-1    | 1                     | 1:25:00 PM  |
| Nymphalidae | Danainae  | <i>Ithomia</i>    | <i>amarilla</i>   | Haensch, 1903     | eurimidia       | 0.2             | valley     | valley0-1    | 1                     | 1:40:00 PM  |
| Nymphalidae | Danainae  | <i>Ithomia</i>    | <i>amarilla</i>   | Haensch, 1903     | eurimidia       | 6               | valley     | valley>3     | 1                     | 1:47:00 PM  |
| Nymphalidae | Danainae  | <i>Ithomia</i>    | <i>amarilla</i>   | Haensch, 1903     | eurimidia       | 1               | valley     | valley1-2    | 1                     | 9:05:00 AM  |
| Nymphalidae | Danainae  | <i>Ithomia</i>    | <i>amarilla</i>   | Haensch, 1903     | eurimidia       | 0.6             | valley     | valley0-1    | 1                     | 9:35:00 AM  |
| Nymphalidae | Danainae  | <i>Ithomia</i>    | <i>amarilla</i>   | Haensch, 1903     | eurimidia       | 0.8             | valley     | valley0-1    | 1                     | 9:42:00 AM  |
| Nymphalidae | Danainae  | <i>Ithomia</i>    | <i>amarilla</i>   | Haensch, 1903     | eurimidia       | 0.3             | valley     | valley0-1    | 1                     | 11:02:00 AM |
| Nymphalidae | Danainae  | <i>Ithomia</i>    | <i>amarilla</i>   | Haensch, 1903     | eurimidia       | 1               | valley     | valley1-2    | 1                     | 3:45:00 PM  |
| Nymphalidae | Danainae  | <i>Ithomia</i>    | <i>amarilla</i>   | Haensch, 1903     | eurimidia       | 0.8             | valley     | valley0-1    | 1                     | 3:54:00 PM  |
| Nymphalidae | Danainae  | <i>Ithomia</i>    | <i>amarilla</i>   | Haensch, 1903     | eurimidia       | 1               | valley     | valley1-2    | 1                     | 4:00:00 PM  |
| Nymphalidae | Danainae  | <i>Ithomia</i>    | <i>amarilla</i>   | Haensch, 1903     | eurimidia       | 0.8             | valley     | valley0-1    | 1                     | 2:30:00 PM  |
| Nymphalidae | Danainae  | <i>Ithomia</i>    | <i>amarilla</i>   | Haensch, 1903     | eurimidia       | 0.8             | valley     | valley0-1    | 1                     | 2:55:00 PM  |
| Nymphalidae | Danainae  | <i>Ithomia</i>    | <i>amarilla</i>   | Haensch, 1903     | eurimidia       | 0.4             | valley     | valley0-1    | 1                     | 1:30:00 PM  |
| Nymphalidae | Danainae  | <i>Ithomia</i>    | <i>amarilla</i>   | Haensch, 1903     | eurimidia       | 0.3             | valley     | valley0-1    | 1                     | 2:00:00 PM  |
| Nymphalidae | Danainae  | <i>Ithomia</i>    | <i>amarilla</i>   | Haensch, 1903     | eurimidia       | 0.3             | valley     | valley0-1    | 1                     | 2:02:00 PM  |
| Nymphalidae | Danainae  | <i>Ithomia</i>    | <i>amarilla</i>   | Haensch, 1903     | eurimidia       | 2.5             | ridge      | ridge2-3     | 1                     | 11:26:00 AM |
| Nymphalidae | Danainae  | <i>Ithomia</i>    | <i>amarilla</i>   | Haensch, 1903     | eurimidia       | 0.3             | valley     | valley0-1    | 1                     | 12:32:00 PM |
| Nymphalidae | Danainae  | <i>Ithomia</i>    | <i>salapia</i>    | Hewitson, [1853]  | eurimidia       | 2               | valley     | valley2-3    | 1                     | 9:02:00 AM  |
| Nymphalidae | Danainae  | <i>Ithomia</i>    | <i>salapia</i>    | Hewitson, [1853]  | eurimidia       | 1               | valley     | valley1-2    | 1                     | 9:02:00 AM  |
| Nymphalidae | Danainae  | <i>Ithomia</i>    | <i>salapia</i>    | Hewitson, [1853]  | eurimidia       | 0.5             | valley     | valley0-1    | 1                     | 9:20:00 AM  |
| Nymphalidae | Danainae  | <i>Ithomia</i>    | <i>salapia</i>    | Hewitson, [1853]  | eurimidia       | 0.7             | valley     | valley0-1    | 1                     | 9:20:00 AM  |
| Nymphalidae | Danainae  | <i>Ithomia</i>    | <i>salapia</i>    | Hewitson, [1853]  | eurimidia       | 0.3             | valley     | valley0-1    | 1                     | 11:45:00 AM |
| Nymphalidae | Danainae  | <i>Ithomia</i>    | <i>salapia</i>    | Hewitson, [1853]  | eurimidia       | 0.4             | valley     | valley0-1    | 1                     | 11:50:00 AM |
| Nymphalidae | Danainae  | <i>Ithomia</i>    | <i>salapia</i>    | Hewitson, [1853]  | eurimidia       | 0.3             | ridge      | ridge0-1     | 1                     | 12:32:00 PM |
| Nymphalidae | Danainae  | <i>Ithomia</i>    | <i>salapia</i>    | Hewitson, [1853]  | eurimidia       | 0.3             | valley     | valley0-1    | 1                     | 3:10:00 PM  |
| Nymphalidae | Danainae  | <i>Ithomia</i>    | <i>salapia</i>    | Hewitson, [1853]  | eurimidia       | 1.2             | valley     | valley1-2    | 1                     | 4:00:00 PM  |
| Nymphalidae | Danainae  | <i>Ithomia</i>    | <i>salapia</i>    | Hewitson, [1853]  | eurimidia       | 0.3             | valley     | valley0-1    | 1                     | 11:05:00 AM |
| Nymphalidae | Danainae  | <i>Lycorea</i>    | <i>halia</i>      | (Hübner, 1816)    | hermias         | 4               | ridge      | ridge>3      | 1                     | 11:33:00 AM |
| Nymphalidae | Danainae  | <i>Lycorea</i>    | <i>pasinuntia</i> | (Cramer, 1782)    | hermias         | 3               | ridge      | ridge>3      | 1                     | 10:40:00 AM |
| Nymphalidae | Danainae  | <i>Lycorea</i>    | <i>pasinuntia</i> | (Cramer, 1782)    | hermias         | 0.7             | valley     | valley0-1    | 1                     | 1:40:00 PM  |
| Nymphalidae | Danainae  | <i>Lycorea</i>    | <i>pasinuntia</i> | (Cramer, 1782)    | hermias         | 1.5             | ridge      | ridge1-2     | 1                     | 10:55:00 AM |
| Nymphalidae | Danainae  | <i>Mechanitis</i> | <i>lysimmia</i>   | (Fabricius, 1793) | hermias         | 1               | ridge      | ridge1-2     | 1                     | 12:15:00 PM |
| Nymphalidae | Danainae  | <i>Mechanitis</i> | <i>lysimmia</i>   | (Fabricius, 1793) | hermias         | 0.4             | valley     | valley0-1    | 1                     | 1:30:00 PM  |
| Nymphalidae | Danainae  | <i>Mechanitis</i> | <i>lysimmia</i>   | (Fabricius, 1793) | hermias         | 2               | ridge      | ridge2-3     | 1                     | 11:05:00 AM |
| Nymphalidae | Danainae  | <i>Mechanitis</i> | <i>mazaesus</i>   | Hewitson, 1860    | hermias         | 1               | ridge      | ridge1-2     | 1                     | 12:23:00 PM |
| Nymphalidae | Danainae  | <i>Mechanitis</i> | <i>mazaesus</i>   | Hewitson, 1860    | hermias         | 1               | ridge      | ridge1-2     | 1                     | 10:20:00 AM |
| Nymphalidae | Danainae  | <i>Mechanitis</i> | <i>mazaesus</i>   | Hewitson, 1860    | hermias         | 1               | ridge      | ridge1-2     | 1                     | 10:20:00 AM |
| Nymphalidae | Danainae  | <i>Mechanitis</i> | <i>mazaesus</i>   | Hewitson, 1860    | hermias         | 1.5             | ridge      | ridge1-2     | 1                     | 12:00:00 PM |
| Nymphalidae | Danainae  | <i>Mechanitis</i> | <i>mazaesus</i>   | Hewitson, 1860    | hermias         | 1               | ridge      | ridge1-2     | 1                     | 12:00:00 PM |
| Nymphalidae | Danainae  | <i>Mechanitis</i> | <i>mazaesus</i>   | Hewitson, 1860    | hermias         | 2.5             | ridge      | ridge2-3     | 1                     | 12:05:00 PM |
| Nymphalidae | Danainae  | <i>Mechanitis</i> | <i>mazaesus</i>   | Hewitson, 1860    | hermias         | 1               | ridge      | ridge1-2     | 1                     | 10:52:00 AM |
| Nymphalidae | Danainae  | <i>Mechanitis</i> | <i>mazaesus</i>   | Hewitson, 1860    | hermias         | 0.2             | valley     | valley0-1    | 1                     | 1:45:00 PM  |
| Nymphalidae | Danainae  | <i>Mechanitis</i> | <i>mazaesus</i>   | Hewitson, 1860    | hermias         | 0.2             | valley     | valley0-1    | 1                     | 1:45:00 PM  |
| Nymphalidae | Danainae  | <i>Mechanitis</i> | <i>mazaesus</i>   | Hewitson, 1860    | hermias         | 1.4             | ridge      | ridge1-2     | 1                     | 9:25:00 AM  |
| Nymphalidae | Danainae  | <i>Mechanitis</i> | <i>mazaesus</i>   | Hewitson, 1860    | hermias         | 2               | valley     | valley2-3    | 1                     | 10:40:00 AM |
| Nymphalidae | Danainae  | <i>Mechanitis</i> | <i>mazaesus</i>   | Hewitson, 1860    | hermias         | 1.5             | ridge      | ridge1-2     | 1                     | 11:31:00 AM |
| Nymphalidae | Danainae  | <i>Mechanitis</i> | <i>mazaesus</i>   | Hewitson, 1860    | hermias         | 1               | ridge      | ridge1-2     | 1                     | 12:54:00 PM |
| Nymphalidae | Danainae  | <i>Mechanitis</i> | <i>mazaesus</i>   | Hewitson, 1860    | hermias         | 0.3             | ridge      | ridge0-1     | 1                     | 12:54:00 PM |
| Nymphalidae | Danainae  | <i>Mechanitis</i> | <i>mazaesus</i>   | Hewitson, 1860    | hermias         | 0.5             | ridge      | ridge0-1     | 1                     | 11:55:00 AM |
| Nymphalidae | Danainae  | <i>Mechanitis</i> | <i>mazaesus</i>   | Hewitson, 1860    | hermias         | 0.5             | ridge      | ridge0-1     | 1                     | 12:40:00 PM |
| Nymphalidae | Danainae  | <i>Mechanitis</i> | <i>mazaesus</i>   | Hewitson, 1860    | hermias         | 0.5             | ridge      | ridge0-1     | 1                     | 12:47:00 PM |
| Nymphalidae | Danainae  | <i>Mechanitis</i> | <i>mazaesus</i>   | Hewitson, 1860    | hermias         | 1.7             | ridge      | ridge1-2     | 1                     | 9:50:00 AM  |
| Nymphalidae | Danainae  | <i>Mechanitis</i> | <i>mazaesus</i>   | Hewitson, 1860    | hermias         | 1               | ridge      | ridge1-2     | 1                     | 10:10:00 AM |

| Family      | Subfamily | Genus             | Species            | Authority            | Mimicry pattern | Flight height/m | Topography | Microhabitat | Number of individuals | Time        |
|-------------|-----------|-------------------|--------------------|----------------------|-----------------|-----------------|------------|--------------|-----------------------|-------------|
| Nymphalidae | Danainae  | <i>Mechanitis</i> | <i>mazaesus</i>    | Hewitson, 1860       | hermias         | 1               | ridge      | ridge1-2     | 1                     | 10:10:00 AM |
| Nymphalidae | Danainae  | <i>Mechanitis</i> | <i>mazaesus</i>    | Hewitson, 1860       | hermias         | 2.5             | ridge      | ridge2-3     | 1                     | 10:30:00 AM |
| Nymphalidae | Danainae  | <i>Mechanitis</i> | <i>mazaesus</i>    | Hewitson, 1860       | hermias         | 1.5             | ridge      | ridge1-2     | 1                     | 10:35:00 AM |
| Nymphalidae | Danainae  | <i>Mechanitis</i> | <i>mazaesus</i>    | Hewitson, 1860       | hermias         | 0.5             | ridge      | ridge0-1     | 1                     | 2:30:00 PM  |
| Nymphalidae | Danainae  | <i>Mechanitis</i> | <i>mazaesus</i>    | Hewitson, 1860       | hermias         | 1               | valley     | valley1-2    | 1                     | 2:05:00 PM  |
| Nymphalidae | Danainae  | <i>Mechanitis</i> | <i>mazaesus</i>    | Hewitson, 1860       | hermias         | 1               | valley     | valley1-2    | 1                     | 2:10:00 PM  |
| Nymphalidae | Danainae  | <i>Mechanitis</i> | <i>mazaesus</i>    | Hewitson, 1860       | hermias         | 3               | valley     | valley>3     | 1                     | 9:30:00 AM  |
| Nymphalidae | Danainae  | <i>Mechanitis</i> | <i>mazaesus</i>    | Hewitson, 1860       | hermias         | 0.4             | ridge      | ridge0-1     | 1                     | 10:20:00 AM |
| Nymphalidae | Danainae  | <i>Mechanitis</i> | <i>messenoides</i> | C. & R. Felder, 1865 | mothone         | 0.8             | valley     | valley0-1    | 1                     | 12:39:00 PM |
| Nymphalidae | Danainae  | <i>Mechanitis</i> | <i>messenoides</i> | C. & R. Felder, 1865 | mothone         | 0.8             | valley     | valley0-1    | 1                     | 11:15:00 AM |
| Nymphalidae | Danainae  | <i>Mechanitis</i> | <i>messenoides</i> | C. & R. Felder, 1865 | mothone         | 1               | ridge      | ridge1-2     | 1                     | 11:02:00 AM |
| Nymphalidae | Danainae  | <i>Mechanitis</i> | <i>messenoides</i> | C. & R. Felder, 1865 | mamercus        | 2               | valley     | valley2-3    | 1                     | 11:10:00 AM |
| Nymphalidae | Danainae  | <i>Mechanitis</i> | <i>messenoides</i> | C. & R. Felder, 1865 | mothone         | 0.5             | ridge      | ridge0-1     | 1                     | 11:15:00 AM |
| Nymphalidae | Danainae  | <i>Mechanitis</i> | <i>messenoides</i> | C. & R. Felder, 1865 | mamercus        | 0.4             | valley     | valley0-1    | 1                     | 1:01:00 PM  |
| Nymphalidae | Danainae  | <i>Mechanitis</i> | <i>messenoides</i> | C. & R. Felder, 1865 | mamercus        | 0.5             | ridge      | ridge0-1     | 1                     | 9:55:00 AM  |
| Nymphalidae | Danainae  | <i>Mechanitis</i> | <i>messenoides</i> | C. & R. Felder, 1865 | mothone         | 0.5             | ridge      | ridge0-1     | 1                     | 9:56:00 AM  |
| Nymphalidae | Danainae  | <i>Mechanitis</i> | <i>messenoides</i> | C. & R. Felder, 1865 | mothone         | 1               | ridge      | ridge1-2     | 1                     | 10:00:00 AM |
| Nymphalidae | Danainae  | <i>Mechanitis</i> | <i>messenoides</i> | C. & R. Felder, 1865 | mothone         | 3               | ridge      | ridge>3      | 1                     | 10:47:00 AM |
| Nymphalidae | Danainae  | <i>Mechanitis</i> | <i>polymnia</i>    | (Linnaeus, 1758)     | hermias         | 1               | valley     | valley1-2    | 1                     | 10:40:00 AM |
| Nymphalidae | Danainae  | <i>Mechanitis</i> | <i>polymnia</i>    | (Linnaeus, 1758)     | hermias         | 1.5             | valley     | valley1-2    | 1                     | 11:55:00 AM |
| Nymphalidae | Danainae  | <i>Melinaea</i>   | <i>marsaeus</i>    | (Hewitson, 1860)     | mothone         | 1.5             | valley     | valley1-2    | 1                     | 12:10:00 PM |
| Nymphalidae | Danainae  | <i>Melinaea</i>   | <i>marsaeus</i>    | (Hewitson, 1860)     | mothone         | 1.5             | valley     | valley1-2    | 1                     | 12:10:00 PM |
| Nymphalidae | Danainae  | <i>Melinaea</i>   | <i>marsaeus</i>    | (Hewitson, 1860)     | mamercus        | 1               | valley     | valley1-2    | 1                     | 11:35:00 AM |
| Nymphalidae | Danainae  | <i>Melinaea</i>   | <i>menophilus</i>  | (Hewitson, [1856])   | mamercus        | 1.5             | valley     | valley1-2    | 1                     | 12:15:00 PM |
| Nymphalidae | Danainae  | <i>Melinaea</i>   | <i>menophilus</i>  | (Hewitson, [1856])   | mamercus        | 1.5             | valley     | valley1-2    | 1                     | 10:50:00 AM |
| Nymphalidae | Danainae  | <i>Melinaea</i>   | <i>menophilus</i>  | (Hewitson, [1856])   | mamercus        | 1.5             | valley     | valley1-2    | 1                     | 3:40:00 PM  |
| Nymphalidae | Danainae  | <i>Melinaea</i>   | <i>satevis</i>     | (Doubleday, 1847)    | hermias         | 1.2             | valley     | valley1-2    | 1                     | 10:09:00 AM |
| Nymphalidae | Danainae  | <i>Melinaea</i>   | <i>satevis</i>     | (Doubleday, 1847)    | hermias         | 3               | ridge      | ridge>3      | 1                     | 10:43:00 AM |
| Nymphalidae | Danainae  | <i>Melinaea</i>   | <i>satevis</i>     | (Doubleday, 1847)    | hermias         | 1.5             | valley     | valley1-2    | 1                     | 12:00:00 PM |
| Nymphalidae | Danainae  | <i>Melinaea</i>   | <i>satevis</i>     | (Doubleday, 1847)    | hermias         | 0.4             | valley     | valley0-1    | 1                     | 12:40:00 PM |
| Nymphalidae | Danainae  | <i>Melinaea</i>   | <i>satevis</i>     | (Doubleday, 1847)    | hermias         | 0.4             | valley     | valley0-1    | 1                     | 12:55:00 PM |
| Nymphalidae | Danainae  | <i>Melinaea</i>   | <i>satevis</i>     | (Doubleday, 1847)    | hermias         | 0.7             | valley     | valley0-1    | 1                     | 4:00:00 PM  |
| Nymphalidae | Danainae  | <i>Melinaea</i>   | <i>satevis</i>     | (Doubleday, 1847)    | hermias         | 2.5             | valley     | valley2-3    | 1                     | 1:35:00 PM  |
| Nymphalidae | Danainae  | <i>Melinaea</i>   | <i>satevis</i>     | (Doubleday, 1847)    | hermias         | 1.5             | ridge      | ridge1-2     | 1                     | 10:50:00 AM |
| Nymphalidae | Danainae  | <i>Melinaea</i>   | <i>satevis</i>     | (Doubleday, 1847)    | hermias         | 0.7             | valley     | valley0-1    | 1                     | 11:20:00 AM |
| Nymphalidae | Danainae  | <i>Methona</i>    | <i>curvifascia</i> | Weymer, 1883         | confusa         | 1.5             | ridge      | ridge1-2     | 1                     | 11:00:00 AM |
| Nymphalidae | Danainae  | <i>Methona</i>    | <i>curvifascia</i> | Weymer, 1883         | confusa         | 2.5             | valley     | valley2-3    | 1                     | 9:17:00 AM  |
| Nymphalidae | Danainae  | <i>Methona</i>    | <i>grandior</i>    | (Forbes, 1944)       | confusa         | 3               | ridge      | ridge>3      | 1                     | 12:22:00 PM |
| Nymphalidae | Danainae  | <i>Methona</i>    | <i>grandior</i>    | (Forbes, 1944)       | confusa         | 3               | ridge      | ridge>3      | 1                     | 12:22:00 PM |
| Nymphalidae | Danainae  | <i>Methona</i>    | unidentified       |                      | confusa         | 1               | ridge      | ridge1-2     | 1                     | 10:55:00 AM |
| Nymphalidae | Danainae  | <i>Methona</i>    | unidentified       |                      | confusa         | 2               | valley     | valley2-3    | 1                     | 8:57:00 AM  |
| Nymphalidae | Danainae  | <i>Methona</i>    | unidentified       |                      | confusa         | 2.5             | ridge      | ridge2-3     | 1                     | 11:34:00 AM |
| Nymphalidae | Danainae  | <i>Napeogenes</i> | <i>rhezia</i>      | (Geyer, [1834])      | mamercus        | 0.3             | valley     | valley0-1    | 1                     | 11:01:00 AM |
| Nymphalidae | Danainae  | <i>Napeogenes</i> | <i>duessa</i>      | (Hewitson, [1859])   | mamercus        | 0.5             | ridge      | ridge0-1     | 1                     | 12:15:00 PM |
| Nymphalidae | Danainae  | <i>Napeogenes</i> | <i>duessa</i>      | (Hewitson, [1859])   | mamercus        | 2.5             | valley     | valley2-3    | 1                     | 2:00:00 PM  |
| Nymphalidae | Danainae  | <i>Napeogenes</i> | <i>duessa</i>      | (Hewitson, [1859])   | mamercus        | 1               | valley     | valley1-2    | 1                     | 12:35:00 PM |
| Nymphalidae | Danainae  | <i>Napeogenes</i> | <i>duessa</i>      | (Hewitson, [1859])   | mamercus        | 1               | ridge      | ridge1-2     | 1                     | 10:30:00 AM |
| Nymphalidae | Danainae  | <i>Napeogenes</i> | <i>duessa</i>      | (Hewitson, [1859])   | mamercus        | 1.5             | ridge      | ridge1-2     | 1                     | 10:00:00 AM |
| Nymphalidae | Danainae  | <i>Napeogenes</i> | <i>inachia</i>     | (Hewitson, 1855)     | eurimedia       | 0.8             | valley     | valley0-1    | 1                     | 12:38:00 PM |
| Nymphalidae | Danainae  | <i>Napeogenes</i> | <i>inachia</i>     | (Hewitson, 1855)     | eurimedia       | 3.5             | valley     | valley>3     | 1                     | 8:25:00 AM  |
| Nymphalidae | Danainae  | <i>Napeogenes</i> | <i>inachia</i>     | (Hewitson, 1855)     | eurimedia       | 1.5             | valley     | valley1-2    | 1                     | 8:32:00 AM  |
| Nymphalidae | Danainae  | <i>Napeogenes</i> | <i>inachia</i>     | (Hewitson, 1855)     | eurimedia       | 0.5             | valley     | valley0-1    | 1                     | 10:59:00 AM |
| Nymphalidae | Danainae  | <i>Napeogenes</i> | <i>inachia</i>     | (Hewitson, 1855)     | eurimedia       | 0.5             | valley     | valley0-1    | 1                     | 10:09:00 AM |
| Nymphalidae | Danainae  | <i>Napeogenes</i> | <i>inachia</i>     | (Hewitson, 1855)     | eurimedia       | 1.5             | valley     | valley1-2    | 1                     | 10:22:00 AM |
| Nymphalidae | Danainae  | <i>Napeogenes</i> | <i>inachia</i>     | (Hewitson, 1855)     | eurimedia       | 1.5             | valley     | valley1-2    | 1                     | 10:22:00 AM |
| Nymphalidae | Danainae  | <i>Napeogenes</i> | <i>inachia</i>     | (Hewitson, 1855)     | eurimedia       | 0.5             | valley     | valley0-1    | 1                     | 10:25:00 AM |
| Nymphalidae | Danainae  | <i>Napeogenes</i> | <i>inachia</i>     | (Hewitson, 1855)     | eurimedia       | 0.7             | valley     | valley0-1    | 1                     | 10:31:00 AM |
| Nymphalidae | Danainae  | <i>Napeogenes</i> | <i>inachia</i>     | (Hewitson, 1855)     | eurimedia       | 0.3             | valley     | valley0-1    | 1                     | 10:37:00 AM |
| Nymphalidae | Danainae  | <i>Napeogenes</i> | <i>inachia</i>     | (Hewitson, 1855)     | eurimedia       | 8               | valley     | valley>3     | 1                     | 10:47:00 AM |
| Nymphalidae | Danainae  | <i>Napeogenes</i> | <i>inachia</i>     | (Hewitson, 1855)     | eurimedia       | 1.5             | valley     | valley1-2    | 1                     | 11:17:00 AM |
| Nymphalidae | Danainae  | <i>Napeogenes</i> | <i>inachia</i>     | (Hewitson, 1855)     | eurimedia       | 1               | valley     | valley1-2    | 1                     | 2:20:00 PM  |
| Nymphalidae | Danainae  | <i>Napeogenes</i> | <i>inachia</i>     | (Hewitson, 1855)     | eurimedia       | 1               | valley     | valley1-2    | 1                     | 2:20:00 PM  |
| Nymphalidae | Danainae  | <i>Napeogenes</i> | <i>inachia</i>     | (Hewitson, 1855)     | eurimedia       | 1.7             | valley     | valley1-2    | 1                     | 2:35:00 PM  |
| Nymphalidae | Danainae  | <i>Napeogenes</i> | <i>inachia</i>     | (Hewitson, 1855)     | eurimedia       | 1               | valley     | valley1-2    | 1                     | 2:35:00 PM  |
| Nymphalidae | Danainae  | <i>Napeogenes</i> | <i>inachia</i>     | (Hewitson, 1855)     | eurimedia       | 1               | ridge      | ridge1-2     | 1                     | 10:30:00 AM |
| Nymphalidae | Danainae  | <i>Napeogenes</i> | <i>inachia</i>     | (Hewitson, 1855)     | eurimedia       | 0.5             | ridge      | ridge0-1     | 1                     | 2:25:00 PM  |
| Nymphalidae | Danainae  | <i>Napeogenes</i> | <i>inachia</i>     | (Hewitson, 1855)     | eurimedia       | 1               | ridge      | ridge1-2     | 1                     | 11:00:00 AM |
| Nymphalidae | Danainae  | <i>Napeogenes</i> | <i>inachia</i>     | (Hewitson, 1855)     | eurimedia       | 1               | valley     | valley1-2    | 1                     | 1:00:00 PM  |
| Nymphalidae | Danainae  | <i>Napeogenes</i> | <i>inachia</i>     | (Hewitson, 1855)     | eurimedia       | 1.5             | valley     | valley1-2    | 1                     | 12:40:00 PM |
| Nymphalidae | Danainae  | <i>Napeogenes</i> | <i>inachia</i>     | (Hewitson, 1855)     | eurimedia       | 0.5             | valley     | valley0-1    | 1                     | 10:40:00 AM |
| Nymphalidae | Danainae  | <i>Napeogenes</i> | <i>inachia</i>     | (Hewitson, 1855)     | eurimedia       | 0.7             | ridge      | ridge0-1     | 1                     | 11:15:00 AM |
| Nymphalidae | Danainae  | <i>Napeogenes</i> | <i>inachia</i>     | (Hewitson, 1855)     | eurimedia       | 1               | ridge      | ridge1-2     | 1                     | 12:05:00 PM |
| Nymphalidae | Danainae  | <i>Napeogenes</i> | <i>inachia</i>     | (Hewitson, 1855)     | eurimedia       | 1.5             | valley     | valley1-2    | 1                     | 10:55:00 AM |

| Family      | Subfamily | Genus             | Species          | Authority              | Mimicry pattern | Flight height/m | Topography | Microhabitat | Number of individuals | Time        |
|-------------|-----------|-------------------|------------------|------------------------|-----------------|-----------------|------------|--------------|-----------------------|-------------|
| Nymphalidae | Danainae  | <i>Napeogenes</i> | <i>inachia</i>   | (Hewitson, 1855)       | eurimedia       | 1               | ridge      | ridge1-2     | 1                     | 12:35:00 PM |
| Nymphalidae | Danainae  | <i>Napeogenes</i> | <i>inachia</i>   | (Hewitson, 1855)       | eurimedia       | 1               | valley     | valley1-2    | 1                     | 1:25:00 PM  |
| Nymphalidae | Danainae  | <i>Napeogenes</i> | <i>inachia</i>   | (Hewitson, 1855)       | eurimedia       | 1.5             | valley     | valley1-2    | 1                     | 11:30:00 AM |
| Nymphalidae | Danainae  | <i>Napeogenes</i> | <i>inachia</i>   | (Hewitson, 1855)       | eurimedia       | 0.8             | valley     | valley0-1    | 1                     | 11:45:00 AM |
| Nymphalidae | Danainae  | <i>Napeogenes</i> | <i>inachia</i>   | (Hewitson, 1855)       | eurimedia       | 2.5             | valley     | valley2-3    | 1                     | 9:42:00 AM  |
| Nymphalidae | Danainae  | <i>Napeogenes</i> | <i>inachia</i>   | (Hewitson, 1855)       | eurimedia       | 1               | valley     | valley1-2    | 1                     | 11:17:00 AM |
| Nymphalidae | Danainae  | <i>Napeogenes</i> | <i>inachia</i>   | (Hewitson, 1855)       | eurimedia       | 0.5             | valley     | valley0-1    | 1                     | 9:55:00 AM  |
| Nymphalidae | Danainae  | <i>Napeogenes</i> | <i>inachia</i>   | (Hewitson, 1855)       | eurimedia       | 1               | valley     | valley1-2    | 1                     | 3:55:00 PM  |
| Nymphalidae | Danainae  | <i>Napeogenes</i> | <i>inachia</i>   | (Hewitson, 1855)       | eurimedia       | 0.8             | valley     | valley0-1    | 1                     | 11:15:00 AM |
| Nymphalidae | Danainae  | <i>Napeogenes</i> | <i>inachia</i>   | (Hewitson, 1855)       | eurimedia       | 0.4             | valley     | valley0-1    | 1                     | 12:05:00 PM |
| Nymphalidae | Danainae  | <i>Napeogenes</i> | <i>inachia</i>   | (Hewitson, 1855)       | eurimedia       | 0.4             | valley     | valley0-1    | 1                     | 12:06:00 PM |
| Nymphalidae | Danainae  | <i>Napeogenes</i> | <i>aethra</i>    | (Hewitson, 1869)       | hermias         | 1               | valley     | valley1-2    | 1                     | 12:20:00 PM |
| Nymphalidae | Danainae  | <i>Napeogenes</i> | <i>aethra</i>    | (Hewitson, 1869)       | hermias         | 3               | ridge      | ridge>3      | 1                     | 12:05:00 PM |
| Nymphalidae | Danainae  | <i>Napeogenes</i> | <i>aethra</i>    | (Hewitson, 1869)       | hermias         | 0.8             | valley     | valley0-1    | 1                     | 11:25:00 AM |
| Nymphalidae | Danainae  | <i>Napeogenes</i> | <i>aethra</i>    | (Hewitson, 1869)       | hermias         | 0.5             | valley     | valley0-1    | 1                     | 11:31:00 AM |
| Nymphalidae | Danainae  | <i>Napeogenes</i> | <i>pharo</i>     | (C. & R. Felder, 1862) | eurimedia       | 3               | valley     | valley>3     | 1                     | 10:37:00 AM |
| Nymphalidae | Danainae  | <i>Napeogenes</i> | <i>pharo</i>     | (C. & R. Felder, 1862) | eurimedia       | 0.5             | valley     | valley0-1    | 1                     | 2:00:00 PM  |
| Nymphalidae | Danainae  | <i>Napeogenes</i> | <i>pharo</i>     | (C. & R. Felder, 1862) | eurimedia       | 2               | ridge      | ridge2-3     | 1                     | 10:25:00 AM |
| Nymphalidae | Danainae  | <i>Napeogenes</i> | <i>pharo</i>     | (C. & R. Felder, 1862) | eurimedia       | 1.5             | valley     | valley1-2    | 1                     | 12:00:00 PM |
| Nymphalidae | Danainae  | <i>Napeogenes</i> | <i>pharo</i>     | (C. & R. Felder, 1862) | eurimedia       | 1.5             | valley     | valley1-2    | 1                     | 12:00:00 PM |
| Nymphalidae | Danainae  | <i>Napeogenes</i> | <i>pharo</i>     | (C. & R. Felder, 1862) | eurimedia       | 1               | valley     | valley1-2    | 1                     | 8:56:00 AM  |
| Nymphalidae | Danainae  | <i>Napeogenes</i> | <i>syphis</i>    | (Guerin, [1844])       | aureliana       | 0.8             | valley     | valley0-1    | 1                     | 9:20:00 AM  |
| Nymphalidae | Danainae  | <i>Napeogenes</i> | <i>syphis</i>    | (Guerin, [1844])       | aureliana       | 0.5             | valley     | valley0-1    | 1                     | 12:30:00 PM |
| Nymphalidae | Danainae  | <i>Napeogenes</i> | <i>syphis</i>    | (Guerin, [1844])       | aureliana       | 0.5             | valley     | valley0-1    | 1                     | 12:30:00 PM |
| Nymphalidae | Danainae  | <i>Napeogenes</i> | <i>syphis</i>    | (Guerin, [1844])       | aureliana       | 1.8             | valley     | valley1-2    | 1                     | 12:55:00 PM |
| Nymphalidae | Danainae  | <i>Napeogenes</i> | <i>syphis</i>    | (Guerin, [1844])       | aureliana       | 3               | valley     | valley>3     | 1                     | 8:28:00 AM  |
| Nymphalidae | Danainae  | <i>Napeogenes</i> | <i>syphis</i>    | (Guerin, [1844])       | aureliana       | 1               | valley     | valley1-2    | 1                     | 10:45:00 AM |
| Nymphalidae | Danainae  | <i>Napeogenes</i> | <i>syphis</i>    | (Guerin, [1844])       | aureliana       | 0.3             | ridge      | ridge0-1     | 1                     | 11:59:00 AM |
| Nymphalidae | Danainae  | <i>Napeogenes</i> | <i>syphis</i>    | (Guerin, [1844])       | aureliana       | 1               | ridge      | ridge1-2     | 1                     | 10:15:00 AM |
| Nymphalidae | Danainae  | <i>Napeogenes</i> | <i>syphis</i>    | (Guerin, [1844])       | aureliana       | 1               | valley     | valley1-2    | 1                     | 1:05:00 PM  |
| Nymphalidae | Danainae  | <i>Napeogenes</i> | <i>syphis</i>    | (Guerin, [1844])       | aureliana       | 1.5             | valley     | valley1-2    | 1                     | 3:30:00 PM  |
| Nymphalidae | Danainae  | <i>Napeogenes</i> | <i>syphis</i>    | (Guerin, [1844])       | aureliana       | 1               | valley     | valley1-2    | 1                     | 1:10:00 PM  |
| Nymphalidae | Danainae  | <i>Napeogenes</i> | <i>syphis</i>    | (Guerin, [1844])       | aureliana       | 0.7             | valley     | valley0-1    | 1                     | 11:35:00 AM |
| Nymphalidae | Danainae  | <i>Napeogenes</i> | <i>syphis</i>    | (Guerin, [1844])       | aureliana       | 0.5             | valley     | valley0-1    | 1                     | 12:25:00 PM |
| Nymphalidae | Danainae  | <i>Napeogenes</i> | <i>syphis</i>    | (Guerin, [1844])       | aureliana       | 0.4             | valley     | valley0-1    | 1                     | 12:40:00 PM |
| Nymphalidae | Danainae  | <i>Napeogenes</i> | <i>syphis</i>    | (Guerin, [1844])       | aureliana       | 1.8             | valley     | valley1-2    | 1                     | 12:12:00 PM |
| Nymphalidae | Danainae  | <i>Oleria</i>     | <i>agarista</i>  | (C. & R. Felder, 1862) | lerida          | 0.3             | ridge      | ridge0-1     | 1                     | 10:10:00 AM |
| Nymphalidae | Danainae  | <i>Oleria</i>     | <i>assimilis</i> | (Haensch, 1903)        | lerida          | 0.3             | valley     | valley0-1    | 1                     | 9:20:00 AM  |
| Nymphalidae | Danainae  | <i>Oleria</i>     | <i>assimilis</i> | (Haensch, 1903)        | lerida          | 0.3             | valley     | valley0-1    | 1                     | 10:59:00 AM |
| Nymphalidae | Danainae  | <i>Oleria</i>     | <i>gunilla</i>   | (Hewitson, 1858)       | lerida          | 0.4             | valley     | valley0-1    | 1                     | 8:42:00 AM  |
| Nymphalidae | Danainae  | <i>Oleria</i>     | <i>gunilla</i>   | (Hewitson, 1858)       | lerida          | 0.4             | valley     | valley0-1    | 1                     | 8:42:00 AM  |
| Nymphalidae | Danainae  | <i>Oleria</i>     | <i>gunilla</i>   | (Hewitson, 1858)       | lerida          | 0.3             | valley     | valley0-1    | 1                     | 11:45:00 AM |
| Nymphalidae | Danainae  | <i>Oleria</i>     | <i>gunilla</i>   | (Hewitson, 1858)       | lerida          | 0.3             | valley     | valley0-1    | 1                     | 11:50:00 AM |
| Nymphalidae | Danainae  | <i>Oleria</i>     | <i>gunilla</i>   | (Hewitson, 1858)       | lerida          | 0.1             | valley     | valley0-1    | 1                     | 12:02:00 PM |
| Nymphalidae | Danainae  | <i>Oleria</i>     | <i>gunilla</i>   | (Hewitson, 1858)       | lerida          | 0.1             | valley     | valley0-1    | 1                     | 12:02:00 PM |
| Nymphalidae | Danainae  | <i>Oleria</i>     | <i>gunilla</i>   | (Hewitson, 1858)       | lerida          | 0.1             | valley     | valley0-1    | 1                     | 12:02:00 PM |
| Nymphalidae | Danainae  | <i>Oleria</i>     | <i>gunilla</i>   | (Hewitson, 1858)       | lerida          | 0.1             | ridge      | ridge0-1     | 1                     | 11:17:00 AM |
| Nymphalidae | Danainae  | <i>Oleria</i>     | <i>gunilla</i>   | (Hewitson, 1858)       | lerida          | 0.2             | valley     | valley0-1    | 1                     | 10:56:00 AM |
| Nymphalidae | Danainae  | <i>Oleria</i>     | <i>gunilla</i>   | (Hewitson, 1858)       | lerida          | 0.3             | valley     | valley0-1    | 1                     | 11:05:00 AM |
| Nymphalidae | Danainae  | <i>Oleria</i>     | <i>gunilla</i>   | (Hewitson, 1858)       | lerida          | 0.5             | ridge      | ridge0-1     | 1                     | 3:35:00 PM  |
| Nymphalidae | Danainae  | <i>Oleria</i>     | <i>gunilla</i>   | (Hewitson, 1858)       | lerida          | 0.2             | valley     | valley0-1    | 1                     | 2:45:00 PM  |
| Nymphalidae | Danainae  | <i>Oleria</i>     | <i>gunilla</i>   | (Hewitson, 1858)       | lerida          | 0.5             | ridge      | ridge0-1     | 1                     | 10:00:00 AM |
| Nymphalidae | Danainae  | <i>Oleria</i>     | <i>gunilla</i>   | (Hewitson, 1858)       | lerida          | 0.2             | valley     | valley0-1    | 1                     | 12:20:00 PM |
| Nymphalidae | Danainae  | <i>Oleria</i>     | <i>gunilla</i>   | (Hewitson, 1858)       | lerida          | 0.2             | valley     | valley0-1    | 1                     | 12:20:00 PM |
| Nymphalidae | Danainae  | <i>Oleria</i>     | <i>gunilla</i>   | (Hewitson, 1858)       | lerida          | 0.2             | valley     | valley0-1    | 1                     | 12:20:00 PM |
| Nymphalidae | Danainae  | <i>Oleria</i>     | <i>gunilla</i>   | (Hewitson, 1858)       | lerida          | 0.1             | valley     | valley0-1    | 1                     | 12:40:00 PM |
| Nymphalidae | Danainae  | <i>Oleria</i>     | <i>gunilla</i>   | (Hewitson, 1858)       | lerida          | 0.4             | valley     | valley0-1    | 1                     | 12:45:00 PM |
| Nymphalidae | Danainae  | <i>Oleria</i>     | <i>gunilla</i>   | (Hewitson, 1858)       | lerida          | 0.5             | valley     | valley0-1    | 1                     | 12:15:00 PM |
| Nymphalidae | Danainae  | <i>Oleria</i>     | <i>gunilla</i>   | (Hewitson, 1858)       | lerida          | 0.5             | valley     | valley0-1    | 1                     | 12:25:00 PM |
| Nymphalidae | Danainae  | <i>Oleria</i>     | <i>gunilla</i>   | (Hewitson, 1858)       | lerida          | 1               | valley     | valley1-2    | 1                     | 12:30:00 PM |
| Nymphalidae | Danainae  | <i>Oleria</i>     | <i>gunilla</i>   | (Hewitson, 1858)       | lerida          | 0.5             | valley     | valley0-1    | 1                     | 2:30:00 PM  |
| Nymphalidae | Danainae  | <i>Oleria</i>     | <i>gunilla</i>   | (Hewitson, 1858)       | lerida          | 0.3             | valley     | valley0-1    | 1                     | 2:45:00 PM  |
| Nymphalidae | Danainae  | <i>Oleria</i>     | <i>gunilla</i>   | (Hewitson, 1858)       | lerida          | 0.4             | valley     | valley0-1    | 1                     | 3:20:00 PM  |
| Nymphalidae | Danainae  | <i>Oleria</i>     | <i>gunilla</i>   | (Hewitson, 1858)       | lerida          | 1               | valley     | valley1-2    | 1                     | 3:20:00 PM  |
| Nymphalidae | Danainae  | <i>Oleria</i>     | <i>gunilla</i>   | (Hewitson, 1858)       | lerida          | 0.3             | ridge      | ridge0-1     | 1                     | 2:35:00 PM  |
| Nymphalidae | Danainae  | <i>Oleria</i>     | <i>gunilla</i>   | (Hewitson, 1858)       | lerida          | 0.5             | valley     | valley0-1    | 1                     | 11:25:00 AM |
| Nymphalidae | Danainae  | <i>Oleria</i>     | <i>gunilla</i>   | (Hewitson, 1858)       | lerida          | 0.6             | valley     | valley0-1    | 1                     | 9:05:00 AM  |
| Nymphalidae | Danainae  | <i>Oleria</i>     | <i>gunilla</i>   | (Hewitson, 1858)       | lerida          | 0.5             | valley     | valley0-1    | 1                     | 9:15:00 AM  |
| Nymphalidae | Danainae  | <i>Oleria</i>     | <i>gunilla</i>   | (Hewitson, 1858)       | lerida          | 0.5             | valley     | valley0-1    | 1                     | 3:50:00 PM  |
| Nymphalidae | Danainae  | <i>Oleria</i>     | <i>gunilla</i>   | (Hewitson, 1858)       | lerida          | 0.7             | valley     | valley0-1    | 1                     | 3:55:00 PM  |
| Nymphalidae | Danainae  | <i>Oleria</i>     | <i>gunilla</i>   | (Hewitson, 1858)       | lerida          | 0.8             | valley     | valley0-1    | 1                     | 2:35:00 PM  |
| Nymphalidae | Danainae  | <i>Oleria</i>     | <i>gunilla</i>   | (Hewitson, 1858)       | lerida          | 1.2             | valley     | valley1-2    | 1                     | 8:25:00 AM  |
| Nymphalidae | Danainae  | <i>Oleria</i>     | <i>gunilla</i>   | (Hewitson, 1858)       | lerida          | 0.5             | valley     | valley0-1    | 1                     | 9:25:00 AM  |



| Family      | Subfamily | Genus              | Species            | Authority           | Mimicry pattern | Flight height/m | Topography | Microhabitat | Number of individuals | Time        |
|-------------|-----------|--------------------|--------------------|---------------------|-----------------|-----------------|------------|--------------|-----------------------|-------------|
| Nymphalidae | Danainae  | <i>Oleria</i>      | <i>gunilla</i>     | (Hewitson, 1858)    | lerida          | 0.3             | valley     | valley0-1    | 1                     | 8:40:00 AM  |
| Nymphalidae | Danainae  | <i>Oleria</i>      | <i>gunilla</i>     | (Hewitson, 1858)    | lerida          | 1               | valley     | valley1-2    | 1                     | 9:07:00 AM  |
| Nymphalidae | Danainae  | <i>Oleria</i>      | <i>gunilla</i>     | (Hewitson, 1858)    | lerida          | 0.4             | valley     | valley0-1    | 1                     | 12:10:00 PM |
| Nymphalidae | Danainae  | <i>Oleria</i>      | <i>onega</i>       | (Hewitson, [1852])  | lerida          | 0.2             | valley     | valley0-1    | 1                     | 9:20:00 AM  |
| Nymphalidae | Danainae  | <i>Oleria</i>      | <i>onega</i>       | (Hewitson, [1852])  | lerida          | 0.2             | valley     | valley0-1    | 1                     | 12:02:00 PM |
| Nymphalidae | Danainae  | <i>Oleria</i>      | <i>onega</i>       | (Hewitson, [1852])  | lerida          | 0.3             | valley     | valley0-1    | 1                     | 10:37:00 AM |
| Nymphalidae | Danainae  | <i>Oleria</i>      | <i>onega</i>       | (Hewitson, [1852])  | lerida          | 1               | valley     | valley1-2    | 1                     | 10:55:00 AM |
| Nymphalidae | Danainae  | <i>Oleria</i>      | <i>onega</i>       | (Hewitson, [1852])  | lerida          | 1               | ridge      | ridge1-2     | 1                     | 9:30:00 AM  |
| Nymphalidae | Danainae  | <i>Oleria</i>      | <i>onega</i>       | (Hewitson, [1852])  | lerida          | 1               | ridge      | ridge1-2     | 1                     | 9:30:00 AM  |
| Nymphalidae | Danainae  | <i>Oleria</i>      | <i>onega</i>       | (Hewitson, [1852])  | lerida          | 1               | ridge      | ridge1-2     | 1                     | 10:30:00 AM |
| Nymphalidae | Danainae  | <i>Oleria</i>      | <i>onega</i>       | (Hewitson, [1852])  | lerida          | 1               | valley     | valley1-2    | 1                     | 12:20:00 PM |
| Nymphalidae | Danainae  | <i>Oleria</i>      | <i>onega</i>       | (Hewitson, [1852])  | lerida          | 0.7             | ridge      | ridge0-1     | 1                     | 11:00:00 AM |
| Nymphalidae | Danainae  | <i>Oleria</i>      | <i>onega</i>       | (Hewitson, [1852])  | lerida          | 1               | ridge      | ridge1-2     | 1                     | 4:25:00 PM  |
| Nymphalidae | Danainae  | <i>Oleria</i>      | <i>onega</i>       | (Hewitson, [1852])  | lerida          | 0.4             | valley     | valley0-1    | 1                     | 1:30:00 PM  |
| Nymphalidae | Danainae  | <i>Oleria</i>      | <i>onega</i>       | (Hewitson, [1852])  | lerida          | 0.2             | valley     | valley0-1    | 1                     | 2:05:00 PM  |
| Nymphalidae | Danainae  | <i>Oleria</i>      | <i>onega</i>       | (Hewitson, [1852])  | lerida          | 0.3             | valley     | valley0-1    | 1                     | 8:35:00 AM  |
| Nymphalidae | Danainae  | <i>Oleria</i>      | <i>onega</i>       | (Hewitson, [1852])  | lerida          | 0.5             | valley     | valley0-1    | 1                     | 9:09:00 AM  |
| Nymphalidae | Danainae  | <i>Oleria</i>      | <i>onega</i>       | (Hewitson, [1852])  | lerida          | 0.5             | valley     | valley0-1    | 1                     | 12:11:00 PM |
| Nymphalidae | Danainae  | <i>Oleria</i>      | <i>sexmaculata</i> | (Haensch, 1903)     | lerida          | 0.5             | valley     | valley0-1    | 1                     | 3:15:00 PM  |
| Nymphalidae | Danainae  | <i>Oleria</i>      | <i>sexmaculata</i> | (Haensch, 1903)     | lerida          | 0.8             | valley     | valley0-1    | 1                     | 8:40:00 AM  |
| Nymphalidae | Danainae  | <i>Pseudoscada</i> | <i>florula</i>     | (Hewitson, [1855])  | aureliana       | 0.8             | valley     | valley0-1    | 1                     | 8:22:00 AM  |
| Nymphalidae | Danainae  | <i>Pseudoscada</i> | <i>florula</i>     | (Hewitson, [1855])  | aureliana       | 0.1             | valley     | valley0-1    | 1                     | 12:02:00 PM |
| Nymphalidae | Danainae  | <i>Pseudoscada</i> | <i>florula</i>     | (Hewitson, [1855])  | aureliana       | 0.1             | ridge      | ridge0-1     | 1                     | 12:52:00 PM |
| Nymphalidae | Danainae  | <i>Pseudoscada</i> | <i>florula</i>     | (Hewitson, [1855])  | aureliana       | 0.7             | valley     | valley0-1    | 1                     | 11:05:00 AM |
| Nymphalidae | Danainae  | <i>Pseudoscada</i> | <i>florula</i>     | (Hewitson, [1855])  | aureliana       | 0.3             | ridge      | ridge0-1     | 1                     | 3:20:00 PM  |
| Nymphalidae | Danainae  | <i>Pseudoscada</i> | <i>florula</i>     | (Hewitson, [1855])  | aureliana       | 0.6             | valley     | valley0-1    | 1                     | 2:20:00 PM  |
| Nymphalidae | Danainae  | <i>Pseudoscada</i> | <i>florula</i>     | (Hewitson, [1855])  | aureliana       | 0.8             | valley     | valley0-1    | 1                     | 2:50:00 PM  |
| Nymphalidae | Danainae  | <i>Pseudoscada</i> | <i>florula</i>     | (Hewitson, [1855])  | aureliana       | 1               | ridge      | ridge1-2     | 1                     | 9:30:00 AM  |
| Nymphalidae | Danainae  | <i>Pseudoscada</i> | <i>florula</i>     | (Hewitson, [1855])  | aureliana       | 1.2             | valley     | valley1-2    | 1                     | 4:05:00 PM  |
| Nymphalidae | Danainae  | <i>Pseudoscada</i> | <i>florula</i>     | (Hewitson, [1855])  | aureliana       | 1               | valley     | valley1-2    | 1                     | 4:15:00 PM  |
| Nymphalidae | Danainae  | <i>Pseudoscada</i> | <i>florula</i>     | (Hewitson, [1855])  | aureliana       | 1               | valley     | valley1-2    | 1                     | 12:00:00 PM |
| Nymphalidae | Danainae  | <i>Pseudoscada</i> | <i>florula</i>     | (Hewitson, [1855])  | aureliana       | 1.5             | valley     | valley1-2    | 1                     | 12:10:00 PM |
| Nymphalidae | Danainae  | <i>Pseudoscada</i> | <i>florula</i>     | (Hewitson, [1855])  | aureliana       | 0.7             | ridge      | ridge0-1     | 1                     | 11:20:00 AM |
| Nymphalidae | Danainae  | <i>Pseudoscada</i> | <i>florula</i>     | (Hewitson, [1855])  | aureliana       | 1.5             | ridge      | ridge1-2     | 1                     | 4:10:00 PM  |
| Nymphalidae | Danainae  | <i>Pseudoscada</i> | <i>florula</i>     | (Hewitson, [1855])  | aureliana       | 0.4             | valley     | valley0-1    | 1                     | 10:45:00 AM |
| Nymphalidae | Danainae  | <i>Pseudoscada</i> | <i>florula</i>     | (Hewitson, [1855])  | aureliana       | 0.3             | valley     | valley0-1    | 1                     | 1:32:00 PM  |
| Nymphalidae | Danainae  | <i>Pseudoscada</i> | <i>florula</i>     | (Hewitson, [1855])  | aureliana       | 0.8             | valley     | valley0-1    | 1                     | 12:10:00 PM |
| Nymphalidae | Danainae  | <i>Pseudoscada</i> | <i>timna</i>       | (Hewitson, [1855])  | agnosia         | 0.6             | valley     | valley0-1    | 1                     | 9:13:00 AM  |
| Nymphalidae | Danainae  | <i>Pseudoscada</i> | <i>timna</i>       | (Hewitson, [1855])  | agnosia         | 0.5             | valley     | valley0-1    | 1                     | 9:13:00 AM  |
| Nymphalidae | Danainae  | <i>Pseudoscada</i> | <i>timna</i>       | (Hewitson, [1855])  | agnosia         | 0.5             | valley     | valley0-1    | 1                     | 9:13:00 AM  |
| Nymphalidae | Danainae  | <i>Pseudoscada</i> | <i>timna</i>       | (Hewitson, [1855])  | agnosia         | 0.2             | valley     | valley0-1    | 1                     | 11:50:00 AM |
| Nymphalidae | Danainae  | <i>Pseudoscada</i> | <i>timna</i>       | (Hewitson, [1855])  | agnosia         | 0.3             | valley     | valley0-1    | 1                     | 2:00:00 PM  |
| Nymphalidae | Danainae  | <i>Pseudoscada</i> | <i>timna</i>       | (Hewitson, [1855])  | agnosia         | 0.5             | valley     | valley0-1    | 1                     | 2:15:00 PM  |
| Nymphalidae | Danainae  | <i>Pseudoscada</i> | <i>timna</i>       | (Hewitson, [1855])  | agnosia         | 1.2             | ridge      | ridge1-2     | 1                     | 4:15:00 PM  |
| Nymphalidae | Danainae  | <i>Pseudoscada</i> | <i>timna</i>       | (Hewitson, [1855])  | agnosia         | 1.5             | ridge      | ridge1-2     | 1                     | 4:25:00 PM  |
| Nymphalidae | Danainae  | <i>Pseudoscada</i> | <i>timna</i>       | (Hewitson, [1855])  | agnosia         | 0.3             | valley     | valley0-1    | 1                     | 10:35:00 AM |
| Nymphalidae | Danainae  | <i>Pseudoscada</i> | <i>timna</i>       | (Hewitson, [1855])  | agnosia         | 0.3             | valley     | valley0-1    | 1                     | 10:35:00 AM |
| Nymphalidae | Danainae  | <i>Pseudoscada</i> | <i>timna</i>       | (Hewitson, [1855])  | agnosia         | 1.5             | valley     | valley1-2    | 1                     | 10:55:00 AM |
| Nymphalidae | Danainae  | <i>Pseudoscada</i> | <i>timna</i>       | (Hewitson, [1855])  | agnosia         | 0.2             | valley     | valley0-1    | 1                     | 1:41:00 PM  |
| Nymphalidae | Danainae  | <i>Pseudoscada</i> | <i>timna</i>       | (Hewitson, [1855])  | agnosia         | 0.1             | valley     | valley0-1    | 1                     | 12:21:00 PM |
| Nymphalidae | Danainae  | <i>Pteronymia</i>  | <i>primula</i>     | (H. W. Bates, 1862) | eurimedia       | 1               | valley     | valley1-2    | 1                     | 9:20:00 AM  |
| Nymphalidae | Danainae  | <i>Pteronymia</i>  | <i>primula</i>     | (H. W. Bates, 1862) | eurimedia       | 0.5             | ridge      | ridge0-1     | 1                     | 12:38:00 PM |
| Nymphalidae | Danainae  | <i>Pteronymia</i>  | <i>primula</i>     | (H. W. Bates, 1862) | eurimedia       | 1               | valley     | valley1-2    | 1                     | 11:50:00 AM |
| Nymphalidae | Danainae  | <i>Pteronymia</i>  | <i>primula</i>     | (H. W. Bates, 1862) | eurimedia       | 0.5             | ridge      | ridge0-1     | 1                     | 11:40:00 AM |
| Nymphalidae | Danainae  | <i>Pteronymia</i>  | <i>primula</i>     | (H. W. Bates, 1862) | eurimedia       | 0.5             | valley     | valley0-1    | 1                     | 12:00:00 PM |
| Nymphalidae | Danainae  | <i>Pteronymia</i>  | <i>primula</i>     | (H. W. Bates, 1862) | eurimedia       | 1               | ridge      | ridge1-2     | 1                     | 10:35:00 AM |
| Nymphalidae | Danainae  | <i>Pteronymia</i>  | <i>primula</i>     | (H. W. Bates, 1862) | eurimedia       | 0.8             | ridge      | ridge0-1     | 1                     | 10:50:00 AM |
| Nymphalidae | Danainae  | <i>Pteronymia</i>  | <i>vestilla</i>    | (Hewitson, [1853])  | eurimedia       | 1               | ridge      | ridge1-2     | 1                     | 11:20:00 AM |
| Nymphalidae | Danainae  | <i>Pteronymia</i>  | <i>vestilla</i>    | (Hewitson, [1853])  | eurimedia       | 1               | ridge      | ridge1-2     | 1                     | 12:00:00 PM |
| Nymphalidae | Danainae  | <i>Scada</i>       | <i>zibia</i>       | (Hewitson, 1856)    | eurimedia       | 0.2             | valley     | valley0-1    | 1                     | 10:45:00 AM |
| Nymphalidae | Danainae  | <i>Scada</i>       | <i>zibia</i>       | (Hewitson, 1856)    | eurimedia       | 0.1             | valley     | valley0-1    | 1                     | 11:09:00 AM |
| Nymphalidae | Danainae  | <i>Scada</i>       | <i>zibia</i>       | (Hewitson, 1856)    | eurimedia       | 0.1             | valley     | valley0-1    | 1                     | 11:09:00 AM |
| Nymphalidae | Danainae  | <i>Scada</i>       | <i>zibia</i>       | (Hewitson, 1856)    | eurimedia       | 0.4             | valley     | valley0-1    | 1                     | 1:45:00 PM  |
| Nymphalidae | Danainae  | <i>Scada</i>       | <i>zibia</i>       | (Hewitson, 1856)    | eurimedia       | 1               | ridge      | ridge1-2     | 1                     | 11:20:00 AM |
| Nymphalidae | Danainae  | <i>Scada</i>       | <i>zibia</i>       | (Hewitson, 1856)    | eurimedia       | 1.6             | valley     | valley1-2    | 1                     | 9:15:00 AM  |
| Nymphalidae | Danainae  | <i>Scada</i>       | <i>zibia</i>       | (Hewitson, 1856)    | eurimedia       | 0.2             | ridge      | ridge0-1     | 1                     | 11:33:00 AM |
| Nymphalidae | Danainae  | <i>Thyridia</i>    | <i>psidii</i>      | (Linnaeus, 1758)    | confusia        | 2               | ridge      | ridge2-3     | 1                     | 11:45:00 AM |
| Nymphalidae | Danainae  | <i>Tithorea</i>    | <i>harmonia</i>    | (Cramer, 1777)      | hermias         | 2.5             | ridge      | ridge2-3     | 1                     | 10:45:00 AM |
| Nymphalidae | Danainae  | <i>Tithorea</i>    | <i>harmonia</i>    | (Cramer, 1777)      | hermias         | 2               | ridge      | ridge2-3     | 1                     | 12:21:00 PM |
| Nymphalidae | Danainae  | <i>Tithorea</i>    | <i>harmonia</i>    | (Cramer, 1777)      | hermias         | 2               | ridge      | ridge2-3     | 1                     | 11:59:00 AM |
| Nymphalidae | Danainae  | <i>Tithorea</i>    | <i>harmonia</i>    | (Cramer, 1777)      | hermias         | 1               | ridge      | ridge1-2     | 1                     | 12:15:00 PM |
| Nymphalidae | Danainae  | <i>Tithorea</i>    | <i>harmonia</i>    | (Cramer, 1777)      | hermias         | 1.5             | valley     | valley1-2    | 1                     | 1:53:00 PM  |
| Nymphalidae | Danainae  | <i>Tithorea</i>    | <i>harmonia</i>    | (Cramer, 1777)      | hermias         | 2.5             | ridge      | ridge2-3     | 1                     | 2:05:00 PM  |

| Family       | Subfamily             | Genus              | Species            | Authority            | Mimicry pattern | Flight height/m | Topography | Microhabitat | Number of individuals | Time        |
|--------------|-----------------------|--------------------|--------------------|----------------------|-----------------|-----------------|------------|--------------|-----------------------|-------------|
| Nymphalidae  | Danainae              | <i>Tithorea</i>    | <i>harmonia</i>    | (Cramer, 1777)       | hermias         | 1.5             | valley     | valley1-2    | 1                     | 3:35:00 PM  |
| Nymphalidae  | Danainae              | <i>Tithorea</i>    | <i>harmonia</i>    | (Cramer, 1777)       | hermias         | 0.7             | valley     | valley0-1    | 1                     | 11:30:00 AM |
| Nymphalidae  | Danainae              | <i>Tithorea</i>    | <i>harmonia</i>    | (Cramer, 1777)       | hermias         | 1.4             | valley     | valley1-2    | 1                     | 12:05:00 PM |
| Nymphalidae  | Danainae              | Unidentified       | unidentified       |                      | eurimedia       | 1.5             | ridge      | ridge1-2     | 1                     | 9:50:00 AM  |
| Nymphalidae  | Danainae              | Unidentified       | unidentified       |                      | aureliana       | 0.5             | valley     | valley0-1    | 1                     | 11:42:00 AM |
| Nymphalidae  | Danainae/Heliconiinae | Unidentified       | unidentified       |                      | hermias         | 4               | valley     | valley>3     | 1                     | 9:06:00 AM  |
| Nymphalidae  | Danainae/Heliconiinae | Unidentified       | unidentified       |                      | hermias         | 3               | ridge      | ridge>3      | 1                     | 11:17:00 AM |
| Nymphalidae  | Danainae/Heliconiinae | Unidentified       | unidentified       |                      | mothone         | 10              | ridge      | ridge>3      | 1                     | 2:59:00 PM  |
| Nymphalidae  | Danainae/Heliconiinae | Unidentified       | unidentified       |                      | mothone         | 7               | ridge      | ridge>3      | 1                     | 12:25:00 PM |
| Nymphalidae  | Heliconiinae          | <i>Eueides</i>     | <i>lampeto</i>     | H.W. Bates, 1862     | mamercus        | 1               | ridge      | ridge1-2     | 1                     | 10:32:00 AM |
| Nymphalidae  | Heliconiinae          | <i>Heliconius</i>  | <i>hecale</i>      | (Fabricius, 1776)    | hermias         | 3               | ridge      | ridge>3      | 1                     | 2:40:00 PM  |
| Nymphalidae  | Heliconiinae          | <i>Heliconius</i>  | <i>numata</i>      | (Cramer, 1782)       | hermias         | 1.5             | valley     | valley1-2    | 1                     | 2:30:00 PM  |
| Nymphalidae  | Heliconiinae          | <i>Heliconius</i>  | <i>numata</i>      | (Cramer, 1782)       | mothone         | 2               | ridge      | ridge2-3     | 1                     | 2:40:00 PM  |
| Nymphalidae  | Heliconiinae          | <i>Heliconius</i>  | <i>numata</i>      | (Cramer, 1782)       | mamercus        | 1.2             | ridge      | ridge1-2     | 1                     | 11:10:00 AM |
| Nymphalidae  | Heliconiinae          | <i>Heliconius</i>  | <i>numata</i>      | (Cramer, 1782)       | hermias         | 5               | ridge      | ridge>3      | 1                     | 12:05:00 PM |
| Nymphalidae  | Heliconiinae          | <i>Heliconius</i>  | <i>numata</i>      | (Cramer, 1782)       | hermias         | 1               | ridge      | ridge1-2     | 1                     | 12:20:00 PM |
| Nymphalidae  | Heliconiinae          | <i>Heliconius</i>  | <i>numata</i>      | (Cramer, 1782)       | mothone         | 1               | valley     | valley1-2    | 1                     | 1:50:00 PM  |
| Nymphalidae  | Heliconiinae          | <i>Heliconius</i>  | <i>numata</i>      | (Cramer, 1782)       | hermias         | 3               | ridge      | ridge>3      | 1                     | 10:15:00 AM |
| Nymphalidae  | Nymphalinae           | <i>Eresia</i>      | <i>eunice</i>      | (Hübner, [1807])     | hermias         | 1               | ridge      | ridge1-2     | 1                     | 12:05:00 PM |
| Nymphalidae  | Nymphalinae           | <i>Eresia</i>      | <i>eunice</i>      | (Hübner, [1807])     | hermias         | 0.5             | ridge      | ridge0-1     | 1                     | 11:00:00 AM |
| Nymphalidae  | Nymphalinae           | <i>Eresia</i>      | <i>eunice</i>      | (Hübner, [1807])     | hermias         | 0.5             | ridge      | ridge0-1     | 1                     | 11:00:00 AM |
| Nymphalidae  | Nymphalinae           | <i>Eresia</i>      | <i>pelonia</i>     | Hewitson, 1852       | hermias         | 1               | ridge      | ridge1-2     | 1                     | 12:50:00 PM |
| Nymphalidae  | Nymphalinae           | <i>Eresia</i>      | <i>pelonia</i>     | Hewitson, 1852       | hermias         | 1               | ridge      | ridge1-2     | 1                     | 12:23:00 PM |
| Nymphalidae  | Nymphalinae           | <i>Eresia</i>      | <i>pelonia</i>     | Hewitson, 1852       | hermias         | 1               | ridge      | ridge1-2     | 1                     | 12:23:00 PM |
| Nymphalidae  | Nymphalinae           | <i>Eresia</i>      | <i>pelonia</i>     | Hewitson, 1852       | hermias         | 0.8             | ridge      | ridge0-1     | 1                     | 12:32:00 PM |
| Nymphalidae  | Nymphalinae           | <i>Eresia</i>      | <i>pelonia</i>     | Hewitson, 1852       | hermias         | 1               | valley     | valley1-2    | 1                     | 11:15:00 AM |
| Nymphalidae  | Nymphalinae           | <i>Eresia</i>      | <i>pelonia</i>     | Hewitson, 1852       | hermias         | 0.1             | ridge      | ridge0-1     | 1                     | 11:08:00 AM |
| Nymphalidae  | Unidentified          | Unidentified       | unidentified       |                      | hermias         | 6               | ridge      | ridge>3      | 1                     | 10:15:00 AM |
| Pieridae     | Dismorphiinae         | <i>Dismorphia</i>  | <i>theucarilla</i> | (Doubleday, 1848)    | lerida          | 0.7             | valley     | valley0-1    | 1                     | 12:50:00 PM |
| Pieridae     | Dismorphiinae         | <i>Dismorphia</i>  | <i>theucarilla</i> | (Doubleday, 1848)    | lerida          | 0.5             | valley     | valley0-1    | 1                     | 12:57:00 PM |
| Pieridae     | Dismorphiinae         | <i>Dismorphia</i>  | <i>theucarilla</i> | (Doubleday, 1848)    | lerida          | 0.4             | valley     | valley0-1    | 1                     | 11:06:00 AM |
| Pieridae     | Dismorphiinae         | <i>Dismorphia</i>  | <i>theucarilla</i> | (Doubleday, 1848)    | lerida          | 0.3             | valley     | valley0-1    | 1                     | 1:57:00 PM  |
| Pieridae     | Dismorphiinae         | <i>Dismorphia</i>  | <i>theucarilla</i> | (Doubleday, 1848)    | lerida          | 1               | valley     | valley1-2    | 1                     | 11:05:00 AM |
| Pieridae     | Dismorphiinae         | <i>Dismorphia</i>  | <i>theucarilla</i> | (Doubleday, 1848)    | lerida          | 0               | valley     | valley0-1    | 1                     | 1:10:00 PM  |
| Pieridae     | Dismorphiinae         | <i>Dismorphia</i>  | <i>theucarilla</i> | (Doubleday, 1848)    | aureliana       | 0.7             | ridge      | ridge0-1     | 1                     | 11:25:00 AM |
| Pieridae     | Dismorphiinae         | <i>Dismorphia</i>  | <i>theucarilla</i> | (Doubleday, 1848)    | lerida          | 1.2             | valley     | valley1-2    | 1                     | 1:15:00 PM  |
| Pieridae     | Dismorphiinae         | <i>Dismorphia</i>  | <i>theucarilla</i> | (Doubleday, 1848)    | lerida          | 0.5             | valley     | valley0-1    | 1                     | 1:35:00 PM  |
| Pieridae     | Dismorphiinae         | <i>Dismorphia</i>  | <i>theucarilla</i> | (Doubleday, 1848)    | lerida          | 0.1             | valley     | valley0-1    | 1                     | 1:48:00 PM  |
| Pieridae     | Dismorphiinae         | <i>Dismorphia</i>  | <i>theucarilla</i> | (Doubleday, 1848)    | lerida          | 1               | valley     | valley1-2    | 1                     | 11:46:00 AM |
| Pieridae     | Dismorphiinae         | <i>Dismorphia</i>  | <i>theucarilla</i> | (Doubleday, 1848)    | lerida          | 0.3             | valley     | valley0-1    | 1                     | 2:15:00 PM  |
| Pieridae     | Dismorphiinae         | <i>Dismorphia</i>  | <i>theucarilla</i> | (Doubleday, 1848)    | lerida          | 0.5             | valley     | valley0-1    | 1                     | 9:30:00 AM  |
| Pieridae     | Dismorphiinae         | <i>Dismorphia</i>  | <i>theucarilla</i> | (Doubleday, 1848)    | aureliana       | 1               | valley     | valley1-2    | 1                     | 11:05:00 AM |
| Pieridae     | Dismorphiinae         | <i>Dismorphia</i>  | <i>theucarilla</i> | (Doubleday, 1848)    | lerida          | 0.4             | valley     | valley0-1    | 1                     | 9:15:00 AM  |
| Pieridae     | Dismorphiinae         | <i>Dismorphia</i>  | <i>theucarilla</i> | (Doubleday, 1848)    | lerida          | 0.5             | valley     | valley0-1    | 1                     | 8:40:00 AM  |
| Pieridae     | Dismorphiinae         | <i>Dismorphia</i>  | <i>theucarilla</i> | (Doubleday, 1848)    | lerida          | 0.2             | valley     | valley0-1    | 1                     | 12:31:00 PM |
| Pieridae     | Dismorphiinae         | <i>Moschoneura</i> | <i>pinthous</i>    | (Linnaeus, 1758)     | eurimedia       | 0.3             | valley     | valley0-1    | 1                     | 12:39:00 PM |
| Pieridae     | Dismorphiinae         | <i>Moschoneura</i> | <i>pinthous</i>    | (Linnaeus, 1758)     | eurimedia       | 0.3             | valley     | valley0-1    | 1                     | 12:45:00 PM |
| Pieridae     | Dismorphiinae         | <i>Moschoneura</i> | <i>pinthous</i>    | (Linnaeus, 1758)     | eurimedia       | 0.5             | valley     | valley0-1    | 1                     | 12:45:00 PM |
| Pieridae     | Dismorphiinae         | <i>Moschoneura</i> | <i>pinthous</i>    | (Linnaeus, 1758)     | eurimedia       | 0.7             | valley     | valley0-1    | 1                     | 12:50:00 PM |
| Pieridae     | Dismorphiinae         | <i>Moschoneura</i> | <i>pinthous</i>    | (Linnaeus, 1758)     | eurimedia       | 0.3             | ridge      | ridge0-1     | 1                     | 10:40:00 AM |
| Pieridae     | Dismorphiinae         | <i>Moschoneura</i> | <i>pinthous</i>    | (Linnaeus, 1758)     | eurimedia       | 0.2             | ridge      | ridge0-1     | 1                     | 12:32:00 PM |
| Pieridae     | Dismorphiinae         | <i>Moschoneura</i> | <i>pinthous</i>    | (Linnaeus, 1758)     | eurimedia       | 0.4             | valley     | valley0-1    | 1                     | 1:10:00 PM  |
| Pieridae     | Dismorphiinae         | <i>Moschoneura</i> | <i>pinthous</i>    | (Linnaeus, 1758)     | eurimedia       | 0.3             | ridge      | ridge0-1     | 1                     | 12:35:00 PM |
| Pieridae     | Dismorphiinae         | <i>Moschoneura</i> | <i>pinthous</i>    | (Linnaeus, 1758)     | eurimedia       | 0.5             | ridge      | ridge0-1     | 1                     | 11:50:00 AM |
| Pieridae     | Dismorphiinae         | <i>Moschoneura</i> | <i>pinthous</i>    | (Linnaeus, 1758)     | eurimedia       | 0.3             | ridge      | ridge0-1     | 1                     | 12:20:00 PM |
| Pieridae     | Dismorphiinae         | <i>Moschoneura</i> | <i>pinthous</i>    | (Linnaeus, 1758)     | eurimedia       | 1.2             | valley     | valley1-2    | 1                     | 1:25:00 PM  |
| Pieridae     | Dismorphiinae         | <i>Moschoneura</i> | <i>pinthous</i>    | (Linnaeus, 1758)     | eurimedia       | 0.5             | ridge      | ridge0-1     | 1                     | 10:05:00 AM |
| Pieridae     | Dismorphiinae         | <i>Moschoneura</i> | <i>pinthous</i>    | (Linnaeus, 1758)     | eurimedia       | 1               | valley     | valley1-2    | 1                     | 3:45:00 PM  |
| Pieridae     | Dismorphiinae         | <i>Moschoneura</i> | <i>pinthous</i>    | (Linnaeus, 1758)     | eurimedia       | 0.8             | valley     | valley0-1    | 1                     | 1:45:00 PM  |
| Pieridae     | Dismorphiinae         | <i>Moschoneura</i> | <i>pinthous</i>    | (Linnaeus, 1758)     | eurimedia       | 1               | valley     | valley1-2    | 1                     | 8:50:00 AM  |
| Pieridae     | Dismorphiinae         | <i>Moschoneura</i> | <i>pinthous</i>    | (Linnaeus, 1758)     | eurimedia       | 0.2             | ridge      | ridge0-1     | 1                     | 9:40:00 AM  |
| Pieridae     | Dismorphiinae         | <i>Moschoneura</i> | <i>pinthous</i>    | (Linnaeus, 1758)     | eurimedia       | 0.5             | ridge      | ridge0-1     | 1                     | 9:45:00 AM  |
| Pieridae     | Dismorphiinae         | <i>Moschoneura</i> | <i>pinthous</i>    | (Linnaeus, 1758)     | eurimedia       | 0.1             | valley     | valley0-1    | 1                     | 12:17:00 PM |
| Pieridae     | Pierinae              | <i>Itaballia</i>   | <i>pandasia</i>    | (Hewitson, 1853)     | eurimedia       | 0.5             | ridge      | ridge0-1     | 1                     | 12:30:00 PM |
| Pieridae     | Pierinae              | <i>Perryhybris</i> | <i>lorena</i>      | (Hewitson, 1852)     | mamercus        | 0.5             | valley     | valley0-1    | 1                     | 10:51:00 AM |
| Pieridae     | Unidentified          | Unidentified       | unidentified       |                      | eurimedia       | 0.5             | valley     | valley0-1    | 1                     | 11:25:00 AM |
| Riodinidae   | Riodininae            | <i>Ithomiola</i>   | <i>floralis</i>    | C. & R. Felder, 1865 | aureliana       | 1.2             | valley     | valley1-2    | 1                     | 10:35:00 AM |
| Riodinidae   | Riodininae            | <i>Ithomiola</i>   | <i>floralis</i>    | C. & R. Felder, 1865 | aureliana       | 0.3             | ridge      | ridge0-1     | 1                     | 9:43:00 AM  |
| Unidentified | Unidentified          | Unidentified       | unidentified       |                      | mothone         | 6               | valley     | valley>3     | 1                     | 12:00:00 PM |
| Unidentified | Unidentified          | Unidentified       | unidentified       |                      | hermias         | 2               | ridge      | ridge2-3     | 1                     | 10:55:00 AM |
| Unidentified | Unidentified          | Unidentified       | unidentified       |                      | eurimedia       | 0.5             | valley     | valley0-1    | 1                     | 2:10:00 PM  |
| Unidentified | Unidentified          | Unidentified       | unidentified       |                      | hermias         | 1               | valley     | valley1-2    | 1                     | 11:10:00 AM |
| Unidentified | Unidentified          | Unidentified       | unidentified       |                      | hermias         | 0.7             | ridge      | ridge0-1     | 1                     | 2:30:00 PM  |

| Family       | Subfamily    | Genus        | Species      | Authority | Mimicry pattern | Flight height/m | Topography | Microhabitat | Number of individuals | Time        |
|--------------|--------------|--------------|--------------|-----------|-----------------|-----------------|------------|--------------|-----------------------|-------------|
| Unidentified | Unidentified | Unidentified | unidentified |           | eurimedia       | 1               | valley     | valley1-2    | 1                     | 11:40:00 AM |

53. Microhabitat distribution data for birds at Río Añangu study site, eastern Ecuador. The classification follows Remsen et al. (2016) A classification of the bird species of South America. AOU.

| Family      | Genus                  | Species                | Authority                      | Common name                   | Flight height/m | Topography | Microhabitat | Number of individuals | Time        |
|-------------|------------------------|------------------------|--------------------------------|-------------------------------|-----------------|------------|--------------|-----------------------|-------------|
| Bucconidae  | <i>Bucco</i>           | <i>capensis</i>        | Linnaeus, 1766                 | Collared Puffbird             | 5               | ridge      | ridge>3      | 2                     | 10:30:00 AM |
| Bucconidae  | <i>Hapaloptila</i>     | <i>castanea</i>        | (Verreaux, 1866)               | White-faced Nunbird           | 15              | ridge      | ridge>3      | 1                     | 8:02:00 AM  |
| Bucconidae  | <i>Hapaloptila</i>     | <i>castanea</i>        | (Verreaux, 1866)               | White-faced Nunbird           | 22              | ridge      | ridge>3      | 1                     | 3:02:00 PM  |
| Bucconidae  | <i>Monasa</i>          | <i>flavirostris</i>    | Strickland, 1850               | Yellow-billed Nunbird         | 6               | valley     | valley>3     | 3                     | 6:00:00 AM  |
| Bucconidae  | <i>Monasa</i>          | <i>flavirostris</i>    | Strickland, 1850               | Yellow-billed Nunbird         | 5               | valley     | valley>3     | 2                     | 11:00:00 AM |
| Bucconidae  | <i>Monasa</i>          | <i>morphoeus</i>       | (Hahn & Küster, 1823)          | White-fronted Nunbird         | 14              | ridge      | ridge>3      | 3                     | 6:20:00 AM  |
| Bucconidae  | <i>Monasa</i>          | <i>morphoeus</i>       | (Hahn & Küster, 1823)          | White-fronted Nunbird         | 12              | ridge      | ridge>3      | 3                     | 12:40:00 PM |
| Bucconidae  | <i>Monasa</i>          | <i>morphoeus</i>       | (Hahn & Küster, 1823)          | White-fronted Nunbird         | 12              | ridge      | ridge>3      | 1                     | 7:42:00 AM  |
| Bucconidae  | <i>Monasa</i>          | <i>morphoeus</i>       | (Hahn & Küster, 1823)          | White-fronted Nunbird         | 17              | ridge      | ridge>3      | 1                     | 2:00:00 PM  |
| Bucconidae  | <i>Monasa</i>          | <i>morphoeus</i>       | (Hahn & Küster, 1823)          | White-fronted Nunbird         | 2               | ridge      | ridge2-3     | 5                     | 11:10:00 AM |
| Bucconidae  | <i>Monasa</i>          | <i>morphoeus</i>       | (Hahn & Küster, 1823)          | White-fronted Nunbird         | 14              | ridge      | ridge>3      | 2                     | 6:15:00 AM  |
| Bucconidae  | <i>Monasa</i>          | <i>morphoeus</i>       | (Hahn & Küster, 1823)          | White-fronted Nunbird         | 17              | valley     | valley>3     | 4                     | 8:20:00 AM  |
| Bucconidae  | <i>Monasa</i>          | <i>morphoeus</i>       | (Hahn & Küster, 1823)          | White-fronted Nunbird         | 30              | ridge      | ridge>3      | 1                     | 8:30:00 AM  |
| Bucconidae  | <i>Monasa</i>          | <i>morphoeus</i>       | (Hahn & Küster, 1823)          | White-fronted Nunbird         | 12              | ridge      | ridge>3      | 1                     | 10:11:00 AM |
| Bucconidae  | <i>Monasa</i>          | <i>morphoeus</i>       | (Hahn & Küster, 1823)          | White-fronted Nunbird         | 9               | ridge      | ridge>3      | 5                     | 12:30:00 PM |
| Bucconidae  | <i>Monasa</i>          | <i>morphoeus</i>       | (Hahn & Küster, 1823)          | White-fronted Nunbird         | 18              | ridge      | ridge>3      | 8                     | 6:40:00 AM  |
| Bucconidae  | <i>Monasa</i>          | <i>morphoeus</i>       | (Hahn & Küster, 1823)          | White-fronted Nunbird         | 15              | valley     | valley>3     | 2                     | 8:10:00 AM  |
| Bucconidae  | <i>Monasa</i>          | <i>morphoeus</i>       | (Hahn & Küster, 1823)          | White-fronted Nunbird         | 12              | ridge      | ridge>3      | 1                     | 8:10:00 AM  |
| Bucconidae  | <i>Monasa</i>          | <i>morphoeus</i>       | (Hahn & Küster, 1823)          | White-fronted Nunbird         | 8               | valley     | valley>3     | 1                     |             |
| Bucconidae  | <i>Monasa</i>          | <i>morphoeus</i>       | (Hahn & Küster, 1823)          | White-fronted Nunbird         | 6               | valley     | valley>3     | 4                     | 7:20:00 AM  |
| Bucconidae  | <i>Monasa</i>          | <i>morphoeus</i>       | (Hahn & Küster, 1823)          | White-fronted Nunbird         | 17              | ridge      | ridge>3      | 1                     | 1:15:00 PM  |
| Bucconidae  | <i>Monasa</i>          | <i>morphoeus</i>       | (Hahn & Küster, 1823)          | White-fronted Nunbird         | 19              | ridge      | ridge>3      | 1                     | 8:57:00 AM  |
| Bucconidae  | <i>Monasa</i>          | <i>nigrifrons</i>      | (Spix, 1824)                   | Black-fronted Nunbird         | 18              | ridge      | ridge>3      | 1                     | 8:07:00 AM  |
| Bucconidae  | <i>Monasa</i>          | <i>nigrifrons</i>      | (Spix, 1824)                   | Black-fronted Nunbird         | 6               | valley     | valley>3     | 4                     | 6:00:00 AM  |
| Bucconidae  | <i>Monasa</i>          | <i>nigrifrons</i>      | (Spix, 1824)                   | Black-fronted Nunbird         | 15              | valley     | valley>3     | 2                     | 10:40:00 AM |
| Bucconidae  | <i>Monasa</i>          | <i>nigrifrons</i>      | (Spix, 1824)                   | Black-fronted Nunbird         | 18              | valley     | valley>3     | 1                     | 6:20:00 AM  |
| Bucconidae  | <i>Monasa</i>          | <i>nigrifrons</i>      | (Spix, 1824)                   | Black-fronted Nunbird         | 12              | valley     | valley>3     | 1                     | 9:55:00 AM  |
| Bucconidae  | <i>Monasa</i>          | <i>nigrifrons</i>      | (Spix, 1824)                   | Black-fronted Nunbird         | 17              | ridge      | ridge>3      | 1                     | 8:55:00 AM  |
| Bucconidae  | <i>Monasa</i>          | <i>nigrifrons</i>      | (Spix, 1824)                   | Black-fronted Nunbird         | 18              | ridge      | ridge>3      | 1                     | 6:32:00 AM  |
| Bucconidae  | <i>Monasa</i>          | <i>nigrifrons</i>      | (Spix, 1824)                   | Black-fronted Nunbird         | 15              | valley     | valley>3     | 5                     | 8:00:00 AM  |
| Bucconidae  | <i>Monasa</i>          | <i>nigrifrons</i>      | (Spix, 1824)                   | Black-fronted Nunbird         | 14              | valley     | valley>3     | 6                     | 8:10:00 AM  |
| Bucconidae  | <i>Monasa</i>          | <i>nigrifrons</i>      | (Spix, 1824)                   | Black-fronted Nunbird         | 3               | valley     | valley>3     | 4                     | 9:30:00 AM  |
| Bucconidae  | <i>Monasa</i>          | <i>nigrifrons</i>      | (Spix, 1824)                   | Black-fronted Nunbird         | 17              | valley     | valley>3     | 3                     | 7:20:00 AM  |
| Bucconidae  | <i>Nonnula</i>         | <i>brunnea</i>         | Sclater, 1881                  | Brown Nunlet                  | 15              | valley     | valley>3     | 1                     | 7:20:00 AM  |
| Bucconidae  | <i>Nonnula</i>         | <i>brunnea</i>         | Sclater, 1881                  | Brown Nunlet                  | 2               | valley     | valley2-3    | 1                     | 8:40:00 AM  |
| Bucconidae  | <i>Nonnula</i>         | <i>brunnea</i>         | Sclater, 1881                  | Brown Nunlet                  | 5               | valley     | valley>3     | 1                     | 2:00:00 PM  |
| Bucconidae  | <i>Nonnula</i>         | <i>brunnea</i>         | Sclater, 1881                  | Brown Nunlet                  | 6               | ridge      | ridge>3      | 1                     | 3:00:00 PM  |
| Corvidae    | <i>Cyanocorax</i>      | <i>violaceus</i>       | Du Bus de Gisignies, 1847      | Violaceous Jay                | 22              | valley     | valley>3     | 2                     | 8:35:00 AM  |
| Corvidae    | <i>Cyanocorax</i>      | <i>violaceus</i>       | Du Bus de Gisignies, 1847      | Violaceous Jay                | 20              | ridge      | ridge>3      | 1                     | 8:06:00 AM  |
| Corvidae    | <i>Cyanocorax</i>      | <i>violaceus</i>       | Du Bus de Gisignies, 1847      | Violaceous Jay                | 18              | ridge      | ridge>3      | 1                     | 6:30:00 AM  |
| Corvidae    | <i>Cyanocorax</i>      | <i>violaceus</i>       | Du Bus de Gisignies, 1847      | Violaceous Jay                | 19              | valley     | valley>3     | 1                     | 6:45:00 AM  |
| Corvidae    | <i>Cyanocorax</i>      | <i>violaceus</i>       | Du Bus de Gisignies, 1847      | Violaceous Jay                | 19              | valley     | valley>3     | 1                     | 10:57:00 AM |
| Corvidae    | <i>Cyanocorax</i>      | <i>violaceus</i>       | Du Bus de Gisignies, 1847      | Violaceous Jay                | 12              | ridge      | ridge>3      | 4                     | 12:15:00 PM |
| Corvidae    | <i>Cyanocorax</i>      | <i>violaceus</i>       | Du Bus de Gisignies, 1847      | Violaceous Jay                | 20              | ridge      | ridge>3      | 1                     | 7:15:00 AM  |
| Cotingidae  | <i>Cotinga</i>         | <i>cayana</i>          | (Linnaeus, 1766)               | Spangled Cotinga              | 19              | ridge      | ridge>3      | 1                     | 6:30:00 AM  |
| Cotingidae  | <i>Gymnoderus</i>      | <i>foetidus</i>        | (Linnaeus, 1758)               | Bare-necked Fruitcrow         | 12              | ridge      | ridge>3      | 3                     | 8:20:00 AM  |
| Cotingidae  | <i>Lipaugus</i>        | <i>vociferans</i>      | (Wied, 1820)                   | Screaming Piha                | 4               | ridge      | ridge>3      | 3                     | 4:35:00 PM  |
| Cotingidae  | <i>Lipaugus</i>        | <i>vociferans</i>      | (Wied, 1820)                   | Screaming Piha                | 8               | ridge      | ridge>3      | 1                     | 8:10:00 AM  |
| Cotingidae  | <i>Lipaugus</i>        | <i>vociferans</i>      | (Wied, 1820)                   | Screaming Piha                | 12              | ridge      | ridge>3      | 2                     | 9:00:00 AM  |
| Cotingidae  | <i>Lipaugus</i>        | <i>vociferans</i>      | (Wied, 1820)                   | Screaming Piha                | 16              | ridge      | ridge>3      | 1                     | 2:00:00 PM  |
| Cotingidae  | <i>Lipaugus</i>        | <i>vociferans</i>      | (Wied, 1820)                   | Screaming Piha                | 7               | ridge      | ridge>3      | 1                     | 12:30:00 PM |
| Cotingidae  | <i>Lipaugus</i>        | <i>vociferans</i>      | (Wied, 1820)                   | Screaming Piha                | 14              | ridge      | ridge>3      | 1                     | 8:58:00 AM  |
| Cotingidae  | <i>Querula</i>         | <i>purpurata</i>       | (Müller, 1776)                 | Purple-throated Fruitcrow     | 17              | valley     | valley>3     | 5                     | 7:22:00 AM  |
| Cotingidae  | <i>Querula</i>         | <i>purpurata</i>       | (Müller, 1776)                 | Purple-throated Fruitcrow     | 17              | valley     | valley>3     | 3                     | 8:30:00 AM  |
| Cotingidae  | <i>Querula</i>         | <i>purpurata</i>       | (Müller, 1776)                 | Purple-throated Fruitcrow     | 22              | valley     | valley>3     | 4                     | 11:17:00 AM |
| Cuculidae   | <i>Coccyua</i>         | <i>minuta</i>          | (Vieillot, 1817)               | Little Cuckoo                 | 12              | ridge      | ridge>3      | 1                     | 12:30:00 PM |
| Cuculidae   | <i>Coccyua</i>         | <i>minuta</i>          | (Vieillot, 1817)               | Little Cuckoo                 | 2               | valley     | valley2-3    | 1                     | 9:30:00 AM  |
| Cuculidae   | <i>Coccyua</i>         | <i>minuta</i>          | (Vieillot, 1817)               | Little Cuckoo                 | 8               | ridge      | ridge>3      | 1                     | 8:35:00 AM  |
| Cuculidae   | <i>Coccyua</i>         | <i>minuta</i>          | (Vieillot, 1817)               | Little Cuckoo                 | 16              | valley     | valley>3     | 1                     | 7:44:00 AM  |
| Cuculidae   | <i>Crotophaga</i>      | <i>ani</i>             | Linnaeus, 1758                 | Smooth-billed Ani             | 8               | valley     | valley>3     | 3                     | 11:40:00 AM |
| Cuculidae   | <i>Piaya</i>           | <i>cayana</i>          | (Linnaeus, 1766)               | Squirrel Cuckoo               | 22              | valley     | valley>3     | 1                     | 11:15:00 AM |
| Cuculidae   | <i>Piaya</i>           | <i>cayana</i>          | (Linnaeus, 1766)               | Squirrel Cuckoo               | 30              | ridge      | ridge>3      | 1                     | 8:30:00 AM  |
| Cuculidae   | <i>Piaya</i>           | <i>cayana</i>          | (Linnaeus, 1766)               | Squirrel Cuckoo               | 10              | ridge      | ridge>3      | 1                     | 7:45:00 AM  |
| Cuculidae   | <i>Piaya</i>           | <i>cayana</i>          | (Linnaeus, 1766)               | Squirrel Cuckoo               | 4               | valley     | valley>3     | 1                     | 12:00:00 PM |
| Cuculidae   | <i>Piaya</i>           | <i>cayana</i>          | (Linnaeus, 1766)               | Squirrel Cuckoo               | 15              | valley     | valley>3     | 1                     | 7:00:00 AM  |
| Cuculidae   | <i>Piaya</i>           | <i>cayana</i>          | (Linnaeus, 1766)               | Squirrel Cuckoo               | 4               | valley     | valley>3     | 1                     | 9:00:00 AM  |
| Falconidae  | <i>Daptrius</i>        | <i>ater</i>            | Vieillot, 1816                 | Black Caracara                | 35              | valley     | valley>3     | 1                     | 8:47:00 AM  |
| Falconidae  | <i>Herpetotheres</i>   | <i>cachinnans</i>      | (Linnaeus, 1758)               | Laughing Falcon               | 18              | ridge      | ridge>3      | 1                     | 11:10:00 AM |
| Furnariidae | <i>Anabacerthia</i>    | <i>ruficaudata</i>     | (D'Orbigny & Lafresnaye, 1838) | Rufous-tailed Foliage-gleaner | 4               | valley     | valley>3     | 1                     | 10:20:00 AM |
| Furnariidae | <i>Ancistrops</i>      | <i>strigilatus</i>     | (Spix, 1825)                   | Chestnut-winged Hookbill      | 14              | ridge      | ridge>3      | 1                     | 8:10:00 AM  |
| Furnariidae | <i>Ancistrops</i>      | <i>strigilatus</i>     | (Spix, 1825)                   | Chestnut-winged Hookbill      | 5               | valley     | valley>3     | 1                     | 12:20:00 PM |
| Furnariidae | <i>Ancistrops</i>      | <i>strigilatus</i>     | (Spix, 1825)                   | Chestnut-winged Hookbill      | 17              | ridge      | ridge>3      | 1                     | 8:45:00 AM  |
| Furnariidae | <i>Automolus</i>       | <i>infuscatus</i>      | (Sclater, 1856)                | Olive-backed Foliage-gleaner  | 3               | valley     | valley>3     | 2                     | 2:00:00 PM  |
| Furnariidae | <i>Automolus</i>       | <i>infuscatus</i>      | (Sclater, 1856)                | Olive-backed Foliage-gleaner  | 2               | valley     | valley2-3    | 1                     | 8:30:00 AM  |
| Furnariidae | <i>Automolus</i>       | <i>infuscatus</i>      | (Sclater, 1856)                | Olive-backed Foliage-gleaner  | 17              | ridge      | ridge>3      | 1                     | 8:45:00 AM  |
| Furnariidae | <i>Automolus</i>       | <i>ochrolaemus</i>     | (Tschudi, 1844)                | Buff-throated Foliage-gleaner | 3               | valley     | valley>3     | 1                     | 7:55:00 AM  |
| Furnariidae | <i>Automolus</i>       | <i>ochrolaemus</i>     | (Tschudi, 1844)                | Buff-throated Foliage-gleaner | 3               | valley     | valley>3     | 1                     | 8:40:00 AM  |
| Furnariidae | <i>Automolus</i>       | <i>ochrolaemus</i>     | (Tschudi, 1844)                | Buff-throated Foliage-gleaner | 5               | valley     | valley>3     | 1                     | 6:15:00 AM  |
| Furnariidae | <i>Automolus</i>       | <i>ochrolaemus</i>     | (Tschudi, 1844)                | Buff-throated Foliage-gleaner | 10              | valley     | valley>3     | 1                     | 11:45:00 AM |
| Furnariidae | <i>Campylorhamphus</i> | <i>trochilirostris</i> | (Lichtenstein, 1820)           | Red-billed Scythebill         | 5               | ridge      | ridge>3      | 1                     | 1:15:00 PM  |
| Furnariidae | <i>Campylorhamphus</i> | <i>trochilirostris</i> | (Lichtenstein, 1820)           | Red-billed Scythebill         | 10              | ridge      | ridge>3      | 2                     | 6:30:00 AM  |
| Furnariidae | <i>Campylorhamphus</i> | <i>trochilirostris</i> | (Lichtenstein, 1820)           | Red-billed Scythebill         | 5               | ridge      | ridge>3      | 1                     | 11:30:00 AM |

| Family       | Genus                    | Species                  | Authority                | Common name                     | Flight height/m | Topography | Microhabitat | Number of individuals | Time        |
|--------------|--------------------------|--------------------------|--------------------------|---------------------------------|-----------------|------------|--------------|-----------------------|-------------|
| Furnariidae  | <i>Campylorhamphus</i>   | <i>trochilirostris</i>   | (Lichtenstein, 1820)     | Red-billed Scythebill           | 2               | valley     | valley2-3    | 1                     | 7:00:00 AM  |
| Furnariidae  | <i>Campylorhamphus</i>   | <i>trochilirostris</i>   | (Lichtenstein, 1820)     | Red-billed Scythebill           | 2               | valley     | valley2-3    | 1                     | 9:55:00 AM  |
| Furnariidae  | <i>Campylorhamphus</i>   | <i>trochilirostris</i>   | (Lichtenstein, 1820)     | Red-billed Scythebill           | 15              | valley     | valley>3     | 1                     | 6:27:00 AM  |
| Furnariidae  | <i>Campylorhamphus</i>   | <i>trochilirostris</i>   | (Lichtenstein, 1820)     | Red-billed Scythebill           | 2               | ridge      | ridge>3      | 1                     | 12:50:00 PM |
| Furnariidae  | <i>Campylorhamphus</i>   | <i>trochilirostris</i>   | (Lichtenstein, 1820)     | Red-billed Scythebill           | 10              | ridge      | ridge>3      | 2                     | 8:47:00 AM  |
| Furnariidae  | <i>Glyphorhynchus</i>    | <i>spirurus</i>          | (Vieillot, 1819)         | Wedge-billed Woodcreeper        | 5               | valley     | valley>3     | 1                     | 9:15:00 AM  |
| Furnariidae  | <i>Glyphorhynchus</i>    | <i>spirurus</i>          | (Vieillot, 1819)         | Wedge-billed Woodcreeper        | 4               | valley     | valley>3     | 1                     | 9:55:00 AM  |
| Furnariidae  | <i>Glyphorhynchus</i>    | <i>spirurus</i>          | (Vieillot, 1819)         | Wedge-billed Woodcreeper        | 10              | ridge      | ridge>3      | 1                     | 7:55:00 AM  |
| Furnariidae  | <i>Glyphorhynchus</i>    | <i>spirurus</i>          | (Vieillot, 1819)         | Wedge-billed Woodcreeper        | 4               | ridge      | ridge>3      | 2                     | 12:30:00 PM |
| Furnariidae  | <i>Glyphorhynchus</i>    | <i>spirurus</i>          | (Vieillot, 1819)         | Wedge-billed Woodcreeper        | 3               | ridge      | ridge>3      | 1                     | 1:15:00 PM  |
| Furnariidae  | <i>Glyphorhynchus</i>    | <i>spirurus</i>          | (Vieillot, 1819)         | Wedge-billed Woodcreeper        | 0               | ridge      | ridge0-1     | 2                     | 5:05:00 PM  |
| Furnariidae  | <i>Glyphorhynchus</i>    | <i>spirurus</i>          | (Vieillot, 1819)         | Wedge-billed Woodcreeper        | 3               | valley     | valley>3     | 1                     | 2:25:00 PM  |
| Furnariidae  | <i>Glyphorhynchus</i>    | <i>spirurus</i>          | (Vieillot, 1819)         | Wedge-billed Woodcreeper        | 8               | valley     | valley>3     | 2                     | 8:45:00 AM  |
| Furnariidae  | <i>Glyphorhynchus</i>    | <i>spirurus</i>          | (Vieillot, 1819)         | Wedge-billed Woodcreeper        | 3               | ridge      | ridge>3      | 1                     | 6:50:00 AM  |
| Furnariidae  | <i>Glyphorhynchus</i>    | <i>spirurus</i>          | (Vieillot, 1819)         | Wedge-billed Woodcreeper        | 5               | ridge      | ridge>3      | 1                     | 8:00:00 AM  |
| Furnariidae  | <i>Glyphorhynchus</i>    | <i>spirurus</i>          | (Vieillot, 1819)         | Wedge-billed Woodcreeper        | 3               | ridge      | ridge>3      | 1                     | 11:05:00 AM |
| Furnariidae  | <i>Glyphorhynchus</i>    | <i>spirurus</i>          | (Vieillot, 1819)         | Wedge-billed Woodcreeper        | 1               | ridge      | ridge1-2     | 2                     | 12:05:00 PM |
| Furnariidae  | <i>Glyphorhynchus</i>    | <i>spirurus</i>          | (Vieillot, 1819)         | Wedge-billed Woodcreeper        | 2               | ridge      | ridge2-3     | 2                     | 11:10:00 AM |
| Furnariidae  | <i>Glyphorhynchus</i>    | <i>spirurus</i>          | (Vieillot, 1819)         | Wedge-billed Woodcreeper        | 2               | ridge      | ridge2-3     | 2                     | 12:40:00 PM |
| Furnariidae  | <i>Glyphorhynchus</i>    | <i>spirurus</i>          | (Vieillot, 1819)         | Wedge-billed Woodcreeper        | 2               | valley     | valley2-3    | 4                     | 2:00:00 PM  |
| Furnariidae  | <i>Glyphorhynchus</i>    | <i>spirurus</i>          | (Vieillot, 1819)         | Wedge-billed Woodcreeper        | 2               | valley     | valley2-3    | 3                     | 8:30:00 AM  |
| Furnariidae  | <i>Glyphorhynchus</i>    | <i>spirurus</i>          | (Vieillot, 1819)         | Wedge-billed Woodcreeper        | 2               | ridge      | ridge2-3     | 1                     | 8:15:00 AM  |
| Furnariidae  | <i>Glyphorhynchus</i>    | <i>spirurus</i>          | (Vieillot, 1819)         | Wedge-billed Woodcreeper        | 2               | ridge      | ridge2-3     | 1                     | 9:20:00 AM  |
| Furnariidae  | <i>Glyphorhynchus</i>    | <i>spirurus</i>          | (Vieillot, 1819)         | Wedge-billed Woodcreeper        | 0               | ridge      | ridge0-1     | 1                     | 1:30:00 PM  |
| Furnariidae  | <i>Glyphorhynchus</i>    | <i>spirurus</i>          | (Vieillot, 1819)         | Wedge-billed Woodcreeper        | 0               | valley     | valley0-1    | 1                     | 10:05:00 AM |
| Furnariidae  | <i>Glyphorhynchus</i>    | <i>spirurus</i>          | (Vieillot, 1819)         | Wedge-billed Woodcreeper        | 1               | ridge      | ridge1-2     | 1                     | 7:10:00 AM  |
| Furnariidae  | <i>Philydor</i>          | <i>erythrocercum</i>     | (Pelzeln, 1859)          | Rufous-rumped Foliole-gleaner   | 2               | ridge      | ridge2-3     | 1                     | 10:45:00 AM |
| Furnariidae  | <i>Philydor</i>          | <i>erythrocercum</i>     | (Pelzeln, 1859)          | Rufous-rumped Foliole-gleaner   | 1               | ridge      | ridge1-2     | 1                     | 7:18:00 AM  |
| Furnariidae  | <i>Philydor</i>          | <i>erythropterum</i>     | (Sclater, 1856)          | Chestnut-winged Foliole-gleaner | 18              | ridge      | ridge>3      | 1                     | 8:45:00 AM  |
| Furnariidae  | <i>Philydor</i>          | <i>erythropterum</i>     | (Sclater, 1856)          | Chestnut-winged Foliole-gleaner | 18              | valley     | valley>3     | 1                     | 7:40:00 AM  |
| Furnariidae  | <i>Philydor</i>          | <i>erythropterum</i>     | (Sclater, 1856)          | Chestnut-winged Foliole-gleaner | 3               | valley     | valley>3     | 1                     | 9:10:00 AM  |
| Furnariidae  | <i>Sclerurus</i>         | <i>caudacutus</i>        | (Vieillot, 1816)         | Black-tailed Leaf-tosser        | 0               | ridge      | ridge0-1     | 1                     | 7:21:00 AM  |
| Furnariidae  | <i>Sclerurus</i>         | <i>caudacutus</i>        | (Vieillot, 1816)         | Black-tailed Leaf-tosser        | 0               | valley     | valley0-1    | 1                     | 6:22:00 AM  |
| Furnariidae  | <i>Sclerurus</i>         | <i>caudacutus</i>        | (Vieillot, 1816)         | Black-tailed Leaf-tosser        | 0               | valley     | valley0-1    | 1                     | 2:40:00 PM  |
| Furnariidae  | <i>Sclerurus</i>         | <i>caudacutus</i>        | (Vieillot, 1816)         | Black-tailed Leaf-tosser        | 0               | valley     | valley0-1    | 1                     | 7:20:00 AM  |
| Furnariidae  | <i>Xenops</i>            | <i>minutus</i>           | (Sparman, 1788)          | Plain Xenops                    | 4               | ridge      | ridge>3      | 1                     | 12:30:00 PM |
| Furnariidae  | <i>Xenops</i>            | <i>minutus</i>           | (Sparman, 1788)          | Plain Xenops                    | 3               | ridge      | ridge>3      | 1                     | 8:00:00 AM  |
| Furnariidae  | <i>Xenops</i>            | <i>minutus</i>           | (Sparman, 1788)          | Plain Xenops                    | 4               | valley     | valley>3     | 1                     | 8:20:00 AM  |
| Furnariidae  | <i>Xenops</i>            | <i>minutus</i>           | (Sparman, 1788)          | Plain Xenops                    | 5               | valley     | valley>3     | 1                     | 12:20:00 PM |
| Furnariidae  | <i>Xenops</i>            | <i>minutus</i>           | (Sparman, 1788)          | Plain Xenops                    | 0               | valley     | valley0-1    | 1                     | 10:00:00 AM |
| Furnariidae  | <i>Xiphocolaptes</i>     | <i>promeropirhynchus</i> | (Lesson, 1840)           | Strong-billed Woodcreeper       | 14              | valley     | valley>3     | 1                     | 11:05:00 AM |
| Furnariidae  | <i>Xiphocolaptes</i>     | <i>promeropirhynchus</i> | (Lesson, 1840)           | Strong-billed Woodcreeper       | 2               | ridge      | ridge2-3     | 3                     | 12:30:00 PM |
| Furnariidae  | <i>Xiphocolaptes</i>     | <i>promeropirhynchus</i> | (Lesson, 1840)           | Strong-billed Woodcreeper       | 17              | valley     | valley>3     | 1                     | 7:20:00 AM  |
| Furnariidae  | <i>Xiphorhynchus</i>     | <i>guttatus</i>          | (Lichtenstein, 1820)     | Buff-throated Woodcreeper       | 8               | ridge      | ridge>3      | 1                     | 4:35:00 PM  |
| Furnariidae  | <i>Xiphorhynchus</i>     | <i>guttatus</i>          | (Lichtenstein, 1820)     | Buff-throated Woodcreeper       | 0               | valley     | valley0-1    | 1                     | 10:00:00 AM |
| Furnariidae  | <i>Xiphorhynchus</i>     | <i>guttatus</i>          | (Lichtenstein, 1820)     | Buff-throated Woodcreeper       | 20              | valley     | valley>3     | 2                     | 7:33:00 AM  |
| Furnariidae  | <i>Xiphorhynchus</i>     | <i>guttatus</i>          | (Lichtenstein, 1820)     | Buff-throated Woodcreeper       | 17              | ridge      | ridge>3      | 1                     | 7:58:00 AM  |
| Furnariidae  | <i>Xiphorhynchus</i>     | <i>guttatus</i>          | (Lichtenstein, 1820)     | Buff-throated Woodcreeper       | 12              | valley     | valley>3     | 1                     | 4:55:00 PM  |
| Furnariidae  | <i>Xiphorhynchus</i>     | <i>guttatus</i>          | (Lichtenstein, 1820)     | Buff-throated Woodcreeper       | 4               | valley     | valley>3     | 1                     | 6:38:00 AM  |
| Furnariidae  | <i>Xiphorhynchus</i>     | <i>guttatus</i>          | (Lichtenstein, 1820)     | Buff-throated Woodcreeper       | 2               | ridge      | ridge2-3     | 2                     | 8:00:00 AM  |
| Furnariidae  | <i>Xiphorhynchus</i>     | <i>guttatus</i>          | (Lichtenstein, 1820)     | Buff-throated Woodcreeper       | 2               | ridge      | ridge2-3     | 1                     | 11:10:00 AM |
| Furnariidae  | <i>Xiphorhynchus</i>     | <i>guttatus</i>          | (Lichtenstein, 1820)     | Buff-throated Woodcreeper       | 3               | ridge      | ridge>3      | 3                     | 12:30:00 PM |
| Furnariidae  | <i>Xiphorhynchus</i>     | <i>guttatus</i>          | (Lichtenstein, 1820)     | Buff-throated Woodcreeper       | 15              | valley     | valley>3     | 1                     | 7:00:00 AM  |
| Furnariidae  | <i>Xiphorhynchus</i>     | <i>guttatus</i>          | (Lichtenstein, 1820)     | Buff-throated Woodcreeper       | 1               | valley     | valley1-2    | 1                     | 9:00:00 AM  |
| Furnariidae  | <i>Xiphorhynchus</i>     | <i>guttatus</i>          | (Lichtenstein, 1820)     | Buff-throated Woodcreeper       | 12              | ridge      | ridge>3      | 1                     | 7:57:00 AM  |
| Furnariidae  | <i>Xiphorhynchus</i>     | <i>guttatus</i>          | (Lichtenstein, 1820)     | Buff-throated Woodcreeper       | 14              | ridge      | ridge>3      | 1                     | 7:14:00 AM  |
| Furnariidae  | <i>Xiphorhynchus</i>     | <i>guttatus</i>          | (Lichtenstein, 1820)     | Buff-throated Woodcreeper       | 3               | valley     | valley>3     | 1                     | 9:54:00 AM  |
| Furnariidae  | <i>Xiphorhynchus</i>     | <i>guttatus</i>          | (Lichtenstein, 1820)     | Buff-throated Woodcreeper       | 22              | valley     | valley>3     | 1                     | 8:25:00 AM  |
| Galbulidae   | <i>Galbalcyrrhynchus</i> | <i>leucotis</i>          | Des Murs, 1845           | White-eared Jacamar             | 8               | valley     | valley>3     | 1                     | 7:30:00 AM  |
| Galbulidae   | <i>Galbalcyrrhynchus</i> | <i>leucotis</i>          | Des Murs, 1845           | White-eared Jacamar             | 8               | valley     | valley>3     | 1                     | 8:00:00 AM  |
| Galbulidae   | <i>Galbalcyrrhynchus</i> | <i>leucotis</i>          | Des Murs, 1845           | White-eared Jacamar             | 4               | valley     | valley>3     | 1                     | 6:00:00 AM  |
| Galbulidae   | <i>Galbula</i>           | <i>albirostris</i>       | Latham, 1790             | Yellow-billed Jacamar           | 19              | ridge      | ridge>3      | 1                     | 9:15:00 AM  |
| Galbulidae   | <i>Galbula</i>           | <i>albirostris</i>       | Latham, 1790             | Yellow-billed Jacamar           | 20              | ridge      | ridge>3      | 1                     | 8:44:00 AM  |
| Galbulidae   | <i>Galbula</i>           | <i>albirostris</i>       | Latham, 1790             | Yellow-billed Jacamar           | 16              | ridge      | ridge>3      | 1                     | 8:15:00 AM  |
| Galbulidae   | <i>Galbula</i>           | <i>albirostris</i>       | Latham, 1790             | Yellow-billed Jacamar           | 20              | ridge      | ridge>3      | 1                     | 9:05:00 AM  |
| Galbulidae   | <i>Galbula</i>           | <i>chalcothorax</i>      | Sclater, 1855            | Purplish Jacamar                | 8               | valley     | valley>3     | 1                     | 8:20:00 AM  |
| Galbulidae   | <i>Galbula</i>           | <i>chalcothorax</i>      | Sclater, 1855            | Purplish Jacamar                | 4               | valley     | valley>3     | 1                     | 9:15:00 AM  |
| Galbulidae   | <i>Galbula</i>           | <i>chalcothorax</i>      | Sclater, 1855            | Purplish Jacamar                | 4               | valley     | valley>3     | 3                     | 10:30:00 AM |
| Galbulidae   | <i>Jacamerops</i>        | <i>aureus</i>            | (Müller, 1776)           | Great Jacamar                   | 6               | valley     | valley>3     | 1                     | 6:10:00 AM  |
| Galbulidae   | <i>Jacamerops</i>        | <i>aureus</i>            | (Müller, 1776)           | Great Jacamar                   | 5               | ridge      | ridge>3      | 1                     | 9:55:00 AM  |
| Galbulidae   | <i>Jacamerops</i>        | <i>aureus</i>            | (Müller, 1776)           | Great Jacamar                   | 8               | ridge      | ridge>3      | 2                     | 8:35:00 AM  |
| Galbulidae   | <i>Jacamerops</i>        | <i>aureus</i>            | (Müller, 1776)           | Great Jacamar                   | 8               | ridge      | ridge>3      | 2                     | 1:15:00 PM  |
| Galbulidae   | <i>Jacamerops</i>        | <i>aureus</i>            | (Müller, 1776)           | Great Jacamar                   | 10              | valley     | valley>3     | 1                     | 6:26:00 AM  |
| Grallariidae | <i>Grallaria</i>         | <i>dignissima</i>        | (Sclater & Salvin, 1880) | Ochre-striped Antpitta          | 0               | ridge      | ridge0-1     | 1                     | 2:00:00 PM  |
| Icteridae    | <i>Cacicus</i>           | <i>cela</i>              | (Linnaeus, 1758)         | Yellow-rumped Cacique           | 16              | ridge      | ridge>3      | 3                     | 10:05:00 AM |
| Icteridae    | <i>Cacicus</i>           | <i>cela</i>              | (Linnaeus, 1758)         | Yellow-rumped Cacique           | 19              | ridge      | ridge>3      | 2                     | 7:10:00 AM  |
| Icteridae    | <i>Cacicus</i>           | <i>cela</i>              | (Linnaeus, 1758)         | Yellow-rumped Cacique           | 16              | valley     | valley>3     | 5                     | 7:35:00 AM  |
| Icteridae    | <i>Cacicus</i>           | <i>cela</i>              | (Linnaeus, 1758)         | Yellow-rumped Cacique           | 20              | valley     | valley>3     | 4                     | 8:23:00 AM  |
| Icteridae    | <i>Cacicus</i>           | <i>cela</i>              | (Linnaeus, 1758)         | Yellow-rumped Cacique           | 12              | ridge      | ridge>3      | 3                     | 6:20:00 AM  |
| Icteridae    | <i>Cacicus</i>           | <i>cela</i>              | (Linnaeus, 1758)         | Yellow-rumped Cacique           | 6               | valley     | valley>3     | 7                     |             |
| Icteridae    | <i>Cacicus</i>           | <i>cela</i>              | (Linnaeus, 1758)         | Yellow-rumped Cacique           | 2               | ridge      | ridge2-3     | 6                     | 12:05:00 PM |
| Icteridae    | <i>Cacicus</i>           | <i>cela</i>              | (Linnaeus, 1758)         | Yellow-rumped Cacique           | 18              | ridge      | ridge>3      | 1                     | 6:15:00 AM  |
| Icteridae    | <i>Cacicus</i>           | <i>cela</i>              | (Linnaeus, 1758)         | Yellow-rumped Cacique           | 20              | valley     | valley>3     | 4                     |             |
| Icteridae    | <i>Cacicus</i>           | <i>cela</i>              | (Linnaeus, 1758)         | Yellow-rumped Cacique           | 20              | valley     | valley>3     | 1                     | 6:55:00 AM  |

| Family         | Genus                | Species              | Authority          | Common name                | Flight height/m | Topography | Microhabitat | Number of individuals | Time        |
|----------------|----------------------|----------------------|--------------------|----------------------------|-----------------|------------|--------------|-----------------------|-------------|
| Icteridae      | <i>Cacicus</i>       | <i>cela</i>          | (Linnaeus, 1758)   | Yellow-rumped Cacique      | 16              | ridge      | ridge>3      | 4                     | 6:35:00 AM  |
| Icteridae      | <i>Cacicus</i>       | <i>cela</i>          | (Linnaeus, 1758)   | Yellow-rumped Cacique      | 19              | valley     | valley>3     | 1                     | 7:32:00 AM  |
| Icteridae      | <i>Cacicus</i>       | <i>cela</i>          | (Linnaeus, 1758)   | Yellow-rumped Cacique      | 12              | ridge      | ridge>3      | 7                     | 7:17:00 AM  |
| Icteridae      | <i>Cacicus</i>       | <i>cela</i>          | (Linnaeus, 1758)   | Yellow-rumped Cacique      | 19              | valley     | valley>3     | 1                     | 7:40:00 AM  |
| Icteridae      | <i>Cacicus</i>       | <i>cela</i>          | (Linnaeus, 1758)   | Yellow-rumped Cacique      | 19              | ridge      | ridge>3      | 1                     | 4:12:00 PM  |
| Icteridae      | <i>Cacicus</i>       | <i>cela</i>          | (Linnaeus, 1758)   | Yellow-rumped Cacique      | 19              | ridge      | ridge>3      | 5                     | 8:25:00 AM  |
| Icteridae      | <i>Cacicus</i>       | <i>cela</i>          | (Linnaeus, 1758)   | Yellow-rumped Cacique      | 20              | ridge      | ridge>3      | 1                     | 8:24:00 AM  |
| Icteridae      | <i>Cacicus</i>       | <i>cela</i>          | (Linnaeus, 1758)   | Yellow-rumped Cacique      | 20              | valley     | valley>3     | 1                     | 6:15:00 AM  |
| Icteridae      | <i>Cacicus</i>       | <i>oseryi</i>        | (Deville, 1849)    | Casqued Cacique            | 22              | valley     | valley>3     | 2                     | 7:41:00 AM  |
| Icteridae      | <i>Cacicus</i>       | <i>solitarius</i>    | Viellot, 1816      | Solitary Black Cacique     | 15              | valley     | valley>3     | 2                     | 10:40:00 AM |
| Icteridae      | <i>Psarocolius</i>   | <i>angustifrons</i>  | (Spix, 1824)       | Russet-backed Oropendola   | 18              | valley     | valley>3     | 9                     |             |
| Icteridae      | <i>Psarocolius</i>   | <i>angustifrons</i>  | (Spix, 1824)       | Russet-backed Oropendola   | 18              | ridge      | ridge>3      | 1                     | 6:18:00 AM  |
| Icteridae      | <i>Psarocolius</i>   | <i>angustifrons</i>  | (Spix, 1824)       | Russet-backed Oropendola   | 14              | valley     | valley>3     | 4                     | 6:05:00 AM  |
| Icteridae      | <i>Psarocolius</i>   | <i>angustifrons</i>  | (Spix, 1824)       | Russet-backed Oropendola   | 22              | valley     | valley>3     | 9                     | 3:14:00 PM  |
| Icteridae      | <i>Psarocolius</i>   | <i>angustifrons</i>  | (Spix, 1824)       | Russet-backed Oropendola   | 19              | valley     | valley>3     | 1                     | 10:55:00 AM |
| Icteridae      | <i>Psarocolius</i>   | <i>angustifrons</i>  | (Spix, 1824)       | Russet-backed Oropendola   | 20              | ridge      | ridge>3      | 4                     | 9:55:00 AM  |
| Icteridae      | <i>Psarocolius</i>   | <i>angustifrons</i>  | (Spix, 1824)       | Russet-backed Oropendola   | 20              | ridge      | ridge>3      | 3                     | 1:58:00 PM  |
| Icteridae      | <i>Psarocolius</i>   | <i>angustifrons</i>  | (Spix, 1824)       | Russet-backed Oropendola   | 18              | ridge      | ridge>3      | 5                     | 8:25:00 AM  |
| Icteridae      | <i>Psarocolius</i>   | <i>angustifrons</i>  | (Spix, 1824)       | Russet-backed Oropendola   | 19              | ridge      | ridge>3      | 1                     | 2:00:00 PM  |
| Icteridae      | <i>Psarocolius</i>   | <i>angustifrons</i>  | (Spix, 1824)       | Russet-backed Oropendola   | 19              | valley     | valley>3     | 1                     | 7:31:00 AM  |
| Icteridae      | <i>Psarocolius</i>   | <i>angustifrons</i>  | (Spix, 1824)       | Russet-backed Oropendola   | 18              | ridge      | ridge>3      | 4                     |             |
| Icteridae      | <i>Psarocolius</i>   | <i>angustifrons</i>  | (Spix, 1824)       | Russet-backed Oropendola   | 18              | valley     | valley>3     | 5                     | 11:30:00 AM |
| Icteridae      | <i>Psarocolius</i>   | <i>angustifrons</i>  | (Spix, 1824)       | Russet-backed Oropendola   | 20              | valley     | valley>3     | 1                     | 7:04:00 AM  |
| Icteridae      | <i>Psarocolius</i>   | <i>angustifrons</i>  | (Spix, 1824)       | Russet-backed Oropendola   | 20              | ridge      | ridge>3      | 3                     | 7:12:00 AM  |
| Icteridae      | <i>Psarocolius</i>   | <i>angustifrons</i>  | (Spix, 1824)       | Russet-backed Oropendola   | 22              | ridge      | ridge>3      | 1                     | 8:00:00 AM  |
| Icteridae      | <i>Psarocolius</i>   | <i>angustifrons</i>  | (Spix, 1824)       | Russet-backed Oropendola   | 23              | ridge      | ridge>3      | 4                     | 7:45:00 AM  |
| Icteridae      | <i>Psarocolius</i>   | <i>angustifrons</i>  | (Spix, 1824)       | Russet-backed Oropendola   | 19              | valley     | valley>3     | 8                     | 7:15:00 AM  |
| Icteridae      | <i>Psarocolius</i>   | <i>angustifrons</i>  | (Spix, 1824)       | Russet-backed Oropendola   | 18              | valley     | valley>3     | 4                     | 6:40:00 AM  |
| Icteridae      | <i>Psarocolius</i>   | <i>angustifrons</i>  | (Spix, 1824)       | Russet-backed Oropendola   | 3               | ridge      | ridge>3      | 15                    | 7:25:00 AM  |
| Icteridae      | <i>Psarocolius</i>   | <i>angustifrons</i>  | (Spix, 1824)       | Russet-backed Oropendola   | 25              | ridge      | ridge>3      | 1                     | 4:01:00 PM  |
| Icteridae      | <i>Psarocolius</i>   | <i>angustifrons</i>  | (Spix, 1824)       | Russet-backed Oropendola   | 16              | ridge      | ridge>3      | 4                     | 6:35:00 AM  |
| Icteridae      | <i>Psarocolius</i>   | <i>angustifrons</i>  | (Spix, 1824)       | Russet-backed Oropendola   | 19              | valley     | valley>3     | 1                     | 8:50:00 AM  |
| Icteridae      | <i>Psarocolius</i>   | <i>angustifrons</i>  | (Spix, 1824)       | Russet-backed Oropendola   | 1               | ridge      | ridge1-2     | 5                     | 12:00:00 PM |
| Icteridae      | <i>Psarocolius</i>   | <i>decumanus</i>     | (Pallas, 1769)     | Crested Oropendola         | 30              | valley     | valley>3     | 1                     | 7:33:00 AM  |
| Icteridae      | <i>Psarocolius</i>   | <i>decumanus</i>     | (Pallas, 1769)     | Crested Oropendola         | 17              | valley     | valley>3     | 2                     | 11:00:00 AM |
| Icteridae      | <i>Psarocolius</i>   | <i>viridis</i>       | (Müller, 1776)     | Green Oropendola           | 25              | valley     | valley>3     | 1                     |             |
| Icteridae      | <i>Psarocolius</i>   | <i>viridis</i>       | (Müller, 1776)     | Green Oropendola           | 18              | ridge      | ridge>3      | 1                     | 6:15:00 AM  |
| Icteridae      | <i>Psarocolius</i>   | <i>viridis</i>       | (Müller, 1776)     | Green Oropendola           | 20              | valley     | valley>3     | 1                     | 7:42:00 AM  |
| Icteridae      | <i>Psarocolius</i>   | <i>viridis</i>       | (Müller, 1776)     | Green Oropendola           | 19              | ridge      | ridge>3      | 1                     | 7:20:00 AM  |
| Icteridae      | <i>Psarocolius</i>   | <i>viridis</i>       | (Müller, 1776)     | Green Oropendola           | 20              | valley     | valley>3     | 6                     | 8:20:00 AM  |
| Icteridae      | <i>Psarocolius</i>   | <i>viridis</i>       | (Müller, 1776)     | Green Oropendola           | 20              | valley     | valley>3     | 6                     |             |
| Icteridae      | <i>Psarocolius</i>   | <i>viridis</i>       | (Müller, 1776)     | Green Oropendola           | 17              | valley     | valley>3     | 1                     | 8:00:00 AM  |
| Icteridae      | <i>Psarocolius</i>   | <i>viridis</i>       | (Müller, 1776)     | Green Oropendola           | 19              | valley     | valley>3     | 1                     | 7:38:00 AM  |
| Icteridae      | <i>Psarocolius</i>   | <i>viridis</i>       | (Müller, 1776)     | Green Oropendola           | 23              | ridge      | ridge>3      | 2                     | 7:45:00 AM  |
| Momotidae      | <i>Baryphthengus</i> | <i>martii</i>        | (Spix, 1824)       | Rufous Motmot              | 20              | ridge      | ridge>3      | 1                     | 8:26:00 AM  |
| Momotidae      | <i>Baryphthengus</i> | <i>martii</i>        | (Spix, 1824)       | Rufous Motmot              | 14              | valley     | valley>3     | 1                     | 6:15:00 AM  |
| Momotidae      | <i>Baryphthengus</i> | <i>martii</i>        | (Spix, 1824)       | Rufous Motmot              | 18              | ridge      | ridge>3      | 1                     | 8:12:00 AM  |
| Momotidae      | <i>Baryphthengus</i> | <i>martii</i>        | (Spix, 1824)       | Rufous Motmot              | 17              | ridge      | ridge>3      | 1                     | 8:46:00 AM  |
| Momotidae      | <i>Baryphthengus</i> | <i>martii</i>        | (Spix, 1824)       | Rufous Motmot              | 9               | ridge      | ridge>3      | 1                     | 8:20:00 AM  |
| Momotidae      | <i>Baryphthengus</i> | <i>martii</i>        | (Spix, 1824)       | Rufous Motmot              | 12              | ridge      | ridge>3      | 1                     | 11:30:00 AM |
| Momotidae      | <i>Baryphthengus</i> | <i>martii</i>        | (Spix, 1824)       | Rufous Motmot              | 10              | valley     | valley>3     | 1                     |             |
| Momotidae      | <i>Baryphthengus</i> | <i>martii</i>        | (Spix, 1824)       | Rufous Motmot              | 19              | ridge      | ridge>3      | 1                     | 7:00:00 AM  |
| Momotidae      | <i>Baryphthengus</i> | <i>martii</i>        | (Spix, 1824)       | Rufous Motmot              | 18              | ridge      | ridge>3      | 1                     | 6:20:00 AM  |
| Momotidae      | <i>Baryphthengus</i> | <i>martii</i>        | (Spix, 1824)       | Rufous Motmot              | 10              | ridge      | ridge>3      | 1                     | 11:15:00 AM |
| Momotidae      | <i>Baryphthengus</i> | <i>martii</i>        | (Spix, 1824)       | Rufous Motmot              | 9               | ridge      | ridge>3      | 1                     | 7:18:00 AM  |
| Momotidae      | <i>Baryphthengus</i> | <i>martii</i>        | (Spix, 1824)       | Rufous Motmot              | 14              | ridge      | ridge>3      | 1                     | 8:22:00 AM  |
| Momotidae      | <i>Baryphthengus</i> | <i>martii</i>        | (Spix, 1824)       | Rufous Motmot              | 19              | ridge      | ridge>3      | 1                     | 2:06:00 PM  |
| Momotidae      | <i>Baryphthengus</i> | <i>martii</i>        | (Spix, 1824)       | Rufous Motmot              | 12              | ridge      | ridge>3      | 2                     | 6:35:00 AM  |
| Momotidae      | <i>Baryphthengus</i> | <i>martii</i>        | (Spix, 1824)       | Rufous Motmot              | 15              | valley     | valley>3     | 2                     | 7:24:00 AM  |
| Momotidae      | <i>Baryphthengus</i> | <i>martii</i>        | (Spix, 1824)       | Rufous Motmot              | 15              | ridge      | ridge>3      | 1                     | 8:50:00 AM  |
| Momotidae      | <i>Electron</i>      | <i>platyrhynchum</i> | (Leadbeater, 1829) | Broad-billed Motmot        | 10              | valley     | valley>3     | 1                     | 11:45:00 AM |
| Momotidae      | <i>Momotus</i>       | <i>momota</i>        | (Linnaeus, 1766)   | Amazonian Motmot           | 4               | valley     | valley>3     | 1                     |             |
| Momotidae      | <i>Momotus</i>       | <i>momota</i>        | (Linnaeus, 1766)   | Amazonian Motmot           | 16              | valley     | valley>3     | 1                     | 7:00:00 AM  |
| Momotidae      | <i>Momotus</i>       | <i>momota</i>        | (Linnaeus, 1766)   | Amazonian Motmot           | 17              | ridge      | ridge>3      | 1                     | 6:58:00 AM  |
| Momotidae      | <i>Momotus</i>       | <i>momota</i>        | (Linnaeus, 1766)   | Amazonian Motmot           | 17              | ridge      | ridge>3      | 1                     | 8:55:00 AM  |
| Momotidae      | <i>Momotus</i>       | <i>momota</i>        | (Linnaeus, 1766)   | Amazonian Motmot           | 20              | valley     | valley>3     | 1                     | 7:25:00 AM  |
| Momotidae      | <i>Momotus</i>       | <i>momota</i>        | (Linnaeus, 1766)   | Amazonian Motmot           | 10              | valley     | valley>3     | 1                     | 8:08:00 AM  |
| Momotidae      | <i>Momotus</i>       | <i>momota</i>        | (Linnaeus, 1766)   | Amazonian Motmot           | 18              | valley     | valley>3     | 1                     | 6:52:00 AM  |
| Momotidae      | <i>Momotus</i>       | <i>momota</i>        | (Linnaeus, 1766)   | Amazonian Motmot           | 14              | valley     | valley>3     | 1                     | 9:04:00 AM  |
| Momotidae      | <i>Momotus</i>       | <i>momota</i>        | (Linnaeus, 1766)   | Amazonian Motmot           | 16              | ridge      | ridge>3      | 1                     | 7:55:00 AM  |
| Momotidae      | <i>Momotus</i>       | <i>momota</i>        | (Linnaeus, 1766)   | Amazonian Motmot           | 11              | valley     | valley>3     | 1                     | 7:36:00 AM  |
| Momotidae      | <i>Momotus</i>       | <i>momota</i>        | (Linnaeus, 1766)   | Amazonian Motmot           | 8               | valley     | valley>3     | 1                     | 8:15:00 AM  |
| Momotidae      | <i>Momotus</i>       | <i>momota</i>        | (Linnaeus, 1766)   | Amazonian Motmot           | 15              | valley     | valley>3     | 2                     | 7:20:00 AM  |
| Momotidae      | <i>Momotus</i>       | <i>momota</i>        | (Linnaeus, 1766)   | Amazonian Motmot           | 10              | ridge      | ridge>3      | 1                     | 8:25:00 AM  |
| Momotidae      | <i>Momotus</i>       | <i>momota</i>        | (Linnaeus, 1766)   | Amazonian Motmot           | 12              | ridge      | ridge>3      | 1                     | 7:20:00 AM  |
| Momotidae      | <i>Momotus</i>       | <i>momota</i>        | (Linnaeus, 1766)   | Amazonian Motmot           | 17              | valley     | valley>3     | 1                     | 8:00:00 AM  |
| Momotidae      | <i>Momotus</i>       | <i>momota</i>        | (Linnaeus, 1766)   | Amazonian Motmot           | 15              | valley     | valley>3     | 2                     | 7:20:00 AM  |
| Momotidae      | <i>Momotus</i>       | <i>momota</i>        | (Linnaeus, 1766)   | Amazonian Motmot           | 15              | ridge      | ridge>3      | 2                     | 10:05:00 AM |
| Odontophoridae | <i>Odontophorus</i>  | <i>gujanensis</i>    | (Gmelin, 1789)     | Marbled Wood-quail         | 0               | ridge      | ridge0-1     | 1                     | 12:40:00 PM |
| Odontophoridae | <i>Odontophorus</i>  | <i>gujanensis</i>    | (Gmelin, 1789)     | Marbled Wood-quail         | 0               | valley     | valley0-1    | 1                     | 6:15:00 AM  |
| Odontophoridae | <i>Odontophorus</i>  | <i>gujanensis</i>    | (Gmelin, 1789)     | Marbled Wood-quail         | 0               | valley     | valley0-1    | 1                     | 8:08:00 AM  |
| Picidae        | <i>Campephilus</i>   | <i>melanoleucos</i>  | (Gmelin, 1788)     | Crimson-crested Woodpecker | 18              | ridge      | ridge>3      | 1                     | 7:45:00 AM  |
| Picidae        | <i>Campephilus</i>   | <i>melanoleucos</i>  | (Gmelin, 1788)     | Crimson-crested Woodpecker | 19              | ridge      | ridge>3      | 1                     | 6:35:00 AM  |
| Picidae        | <i>Campephilus</i>   | <i>melanoleucos</i>  | (Gmelin, 1788)     | Crimson-crested Woodpecker | 19              | ridge      | ridge>3      | 1                     | 6:20:00 AM  |

| Family         | Genus                 | Species               | Authority                   | Common name                 | Flight height/m | Topography | Microhabitat | Number of individuals | Time        |
|----------------|-----------------------|-----------------------|-----------------------------|-----------------------------|-----------------|------------|--------------|-----------------------|-------------|
| Picidae        | <i>Campephilus</i>    | <i>melanoleucos</i>   | (Gmelin, 1788)              | Crimson-crested Woodpecker  | 22              | ridge      | ridge>3      | 1                     | 6:50:00 AM  |
| Picidae        | <i>Celeus</i>         | <i>elegans</i>        | (Müller, 1776)              | Chestnut Woodpecker         | 18              | ridge      | ridge>3      | 2                     | 7:03:00 AM  |
| Picidae        | <i>Celeus</i>         | <i>elegans</i>        | (Müller, 1776)              | Chestnut Woodpecker         | 17              | ridge      | ridge>3      | 2                     | 6:38:00 AM  |
| Picidae        | <i>Celeus</i>         | <i>grammicus</i>      | (Natterer & Malherbe, 1845) | Scale-breasted Woodpecker   | 12              | valley     | valley>3     | 1                     | 11:05:00 AM |
| Picidae        | <i>Dryocopus</i>      | <i>lineatus</i>       | (Linnaeus, 1766)            | Lineated Woodpecker         | 18              | valley     | valley>3     | 1                     | 6:52:00 AM  |
| Picidae        | <i>Dryocopus</i>      | <i>lineatus</i>       | (Linnaeus, 1766)            | Lineated Woodpecker         | 20              | valley     | valley>3     | 1                     | 5:50:00 AM  |
| Picidae        | <i>Dryocopus</i>      | <i>lineatus</i>       | (Linnaeus, 1766)            | Lineated Woodpecker         | 22              | ridge      | ridge>3      | 1                     | 7:13:00 AM  |
| Picidae        | <i>Dryocopus</i>      | <i>lineatus</i>       | (Linnaeus, 1766)            | Lineated Woodpecker         | 25              | valley     | valley>3     | 2                     | 11:55:00 AM |
| Picidae        | <i>Dryocopus</i>      | <i>lineatus</i>       | (Linnaeus, 1766)            | Lineated Woodpecker         | 9               | valley     | valley>3     | 1                     | 9:27:00 AM  |
| Picidae        | <i>Melanerpes</i>     | <i>cruentatus</i>     | (Boddaert, 1783)            | Yellow-tufted Woodpecker    | 14              | ridge      | ridge>3      | 1                     |             |
| Picidae        | <i>Melanerpes</i>     | <i>cruentatus</i>     | (Boddaert, 1783)            | Yellow-tufted Woodpecker    | 8               | ridge      | ridge>3      | 1                     | 8:40:00 AM  |
| Picidae        | <i>Melanerpes</i>     | <i>cruentatus</i>     | (Boddaert, 1783)            | Yellow-tufted Woodpecker    | 18              | valley     | valley>3     | 2                     | 8:00:00 AM  |
| Picidae        | <i>Melanerpes</i>     | <i>cruentatus</i>     | (Boddaert, 1783)            | Yellow-tufted Woodpecker    | 12              | ridge      | ridge>3      | 2                     | 7:30:00 AM  |
| Picidae        | <i>Piculus</i>        | <i>flavigula</i>      | (Boddaert, 1783)            | Yellow-throated Woodpecker  | 18              | valley     | valley>3     | 2                     | 7:20:00 AM  |
| Picidae        | <i>Piculus</i>        | <i>leucolaemus</i>    | (Natterer & Malherbe, 1845) | White-throated Woodpecker   | 8               | ridge      | ridge>3      | 1                     | 7:58:00 AM  |
| Picidae        | <i>Picumnus</i>       | <i>lafresnayi</i>     | Malherbe, 1862              | Lafresnaye's Piculet        | 20              | valley     | valley>3     | 1                     | 7:33:00 AM  |
| Picidae        | <i>Picumnus</i>       | <i>lafresnayi</i>     | Malherbe, 1862              | Lafresnaye's Piculet        | 5               | valley     | valley>3     | 1                     | 12:20:00 PM |
| Picidae        | <i>Veniliornis</i>    | <i>passerinus</i>     | (Linnaeus, 1766)            | Little Woodpecker           | 17              | ridge      | ridge>3      | 2                     | 6:20:00 AM  |
| Picidae        | <i>Veniliornis</i>    | <i>passerinus</i>     | (Linnaeus, 1766)            | Little Woodpecker           | 15              | valley     | valley>3     | 1                     | 1:20:00 PM  |
| Picidae        | <i>Veniliornis</i>    | <i>passerinus</i>     | (Linnaeus, 1766)            | Little Woodpecker           | 8               | valley     | valley>3     | 1                     | 9:15:00 AM  |
| Pipridae       | <i>Ceratopipra</i>    | <i>erythrocephala</i> | (Linnaeus, 1758)            | Golden-headed Manakin       | 3               | ridge      | ridge>3      | 4                     | 9:30:00 AM  |
| Pipridae       | <i>Ceratopipra</i>    | <i>erythrocephala</i> | (Linnaeus, 1758)            | Golden-headed Manakin       | 6               | ridge      | ridge>3      | 2                     | 10:20:00 AM |
| Pipridae       | <i>Ceratopipra</i>    | <i>erythrocephala</i> | (Linnaeus, 1758)            | Golden-headed Manakin       | 3               | ridge      | ridge>3      | 5                     | 9:09:00 AM  |
| Pipridae       | <i>Ceratopipra</i>    | <i>erythrocephala</i> | (Linnaeus, 1758)            | Golden-headed Manakin       | 4               | ridge      | ridge>3      | 1                     | 8:22:00 AM  |
| Pipridae       | <i>Ceratopipra</i>    | <i>erythrocephala</i> | (Linnaeus, 1758)            | Golden-headed Manakin       | 4               | ridge      | ridge>3      | 1                     | 6:35:00 AM  |
| Pipridae       | <i>Ceratopipra</i>    | <i>erythrocephala</i> | (Linnaeus, 1758)            | Golden-headed Manakin       | 20              | ridge      | ridge>3      | 1                     | 8:40:00 AM  |
| Pipridae       | <i>Ceratopipra</i>    | <i>erythrocephala</i> | (Linnaeus, 1758)            | Golden-headed Manakin       | 10              | ridge      | ridge>3      | 2                     | 8:40:00 AM  |
| Pipridae       | <i>Chiroxiphia</i>    | <i>pareola</i>        | (Linnaeus, 1766)            | Blue-backed Manakin         | 18              | valley     | valley>3     | 2                     | 9:15:00 AM  |
| Pipridae       | <i>Cryptopipo</i>     | <i>holochlora</i>     | Sclater, 1888               | Green Manakin               | 2               | ridge      | ridge2-3     | 1                     | 7:15:00 AM  |
| Pipridae       | <i>Lepidothrix</i>    | <i>coronata</i>       | Spix, 1825                  | Blue-crowned Manakin        | 2               | ridge      | ridge2-3     | 1                     | 10:15:00 AM |
| Pipridae       | <i>Lepidothrix</i>    | <i>coronata</i>       | Spix, 1825                  | Blue-crowned Manakin        | 3               | ridge      | ridge>3      | 1                     | 4:05:00 PM  |
| Pipridae       | <i>Lepidothrix</i>    | <i>coronata</i>       | Spix, 1825                  | Blue-crowned Manakin        | 2               | ridge      | ridge2-3     | 1                     | 8:12:00 AM  |
| Pipridae       | <i>Lepidothrix</i>    | <i>coronata</i>       | Spix, 1825                  | Blue-crowned Manakin        | 2               | ridge      | ridge2-3     | 1                     | 9:30:00 AM  |
| Pipridae       | <i>Lepidothrix</i>    | <i>coronata</i>       | Spix, 1825                  | Blue-crowned Manakin        | 18              | ridge      | ridge>3      | 1                     | 2:58:00 PM  |
| Pipridae       | <i>Lepidothrix</i>    | <i>coronata</i>       | Spix, 1825                  | Blue-crowned Manakin        | 8               | valley     | valley>3     | 1                     | 7:20:00 AM  |
| Pipridae       | <i>Lepidothrix</i>    | <i>coronata</i>       | Spix, 1825                  | Blue-crowned Manakin        | 1               | ridge      | ridge1-2     | 1                     | 10:50:00 AM |
| Pipridae       | <i>Lepidothrix</i>    | <i>coronata</i>       | Spix, 1825                  | Blue-crowned Manakin        | 2               | valley     | valley2-3    | 2                     | 7:00:00 AM  |
| Pipridae       | <i>Lepidothrix</i>    | <i>coronata</i>       | Spix, 1825                  | Blue-crowned Manakin        | 8               | ridge      | ridge>3      | 2                     | 6:30:00 AM  |
| Poliopitidae   | <i>Ramphocaenus</i>   | <i>melanurus</i>      | Viellot, 1819               | Long-billed Gnatwren        | 1               | valley     | valley1-2    | 1                     | 9:00:00 AM  |
| Rhinocryptidae | <i>Liosceles</i>      | <i>thoracicus</i>     | (Sclater, 1865)             | Rusty-belted Tapaculo       | 2               | valley     | valley2-3    | 1                     | 10:55:00 AM |
| Rhinocryptidae | <i>Liosceles</i>      | <i>thoracicus</i>     | (Sclater, 1865)             | Rusty-belted Tapaculo       | 6               | valley     | valley>3     | 1                     | 8:17:00 AM  |
| Rhinocryptidae | <i>Liosceles</i>      | <i>thoracicus</i>     | (Sclater, 1865)             | Rusty-belted Tapaculo       | 3               | ridge      | ridge>3      | 1                     | 6:30:00 AM  |
| Thamnophilidae | <i>Akletos</i>        | <i>melanoceps</i>     | (Spix, 1825)                | White-shouldered Antbird    | 1               | ridge      | ridge1-2     | 2                     | 6:35:00 AM  |
| Thamnophilidae | <i>Akletos</i>        | <i>melanoceps</i>     | (Spix, 1825)                | White-shouldered Antbird    | 0               | valley     | valley0-1    | 2                     | 6:10:00 AM  |
| Thamnophilidae | <i>Akletos</i>        | <i>melanoceps</i>     | (Spix, 1825)                | White-shouldered Antbird    | 2               | valley     | valley2-3    | 1                     | 8:00:00 AM  |
| Thamnophilidae | <i>Cercomacroides</i> | <i>serva</i>          | (Sclater, 1858)             | Black Antbird               | 1               | ridge      | ridge1-2     | 1                     | 6:50:00 AM  |
| Thamnophilidae | <i>Euchrepomis</i>    | <i>humeralis</i>      | (Sclater & Salvin, 1880)    | Chestnut-shouldered Antwren | 4               | valley     | valley>3     | 1                     | 11:50:00 AM |
| Thamnophilidae | <i>Gymnopathys</i>    | <i>bicolor</i>        | (Lawrence, 1863)            | Bicolored Antbird           | 0               | ridge      | ridge0-1     | 1                     |             |
| Thamnophilidae | <i>Gymnopathys</i>    | <i>bicolor</i>        | (Lawrence, 1863)            | Bicolored Antbird           | 0               | ridge      | ridge0-1     | 1                     | 1:50:00 PM  |
| Thamnophilidae | <i>Hafferia</i>       | <i>fortis</i>         | (Sclater & Salvin, 1868)    | Sooty Antbird               | 2               | valley     | valley2-3    | 1                     | 6:15:00 AM  |
| Thamnophilidae | <i>Hafferia</i>       | <i>fortis</i>         | (Sclater & Salvin, 1868)    | Sooty Antbird               | 0               | ridge      | ridge0-1     | 1                     | 11:30:00 AM |
| Thamnophilidae | <i>Hafferia</i>       | <i>fortis</i>         | (Sclater & Salvin, 1868)    | Sooty Antbird               | 2               | valley     | valley2-3    | 1                     | 9:45:00 AM  |
| Thamnophilidae | <i>Hafferia</i>       | <i>fortis</i>         | (Sclater & Salvin, 1868)    | Sooty Antbird               | 1               | valley     | ridge1-2     | 2                     | 9:40:00 AM  |
| Thamnophilidae | <i>Hafferia</i>       | <i>fortis</i>         | (Sclater & Salvin, 1868)    | Sooty Antbird               | 0               | valley     | valley0-1    | 1                     | 5:55:00 AM  |
| Thamnophilidae | <i>Hafferia</i>       | <i>fortis</i>         | (Sclater & Salvin, 1868)    | Sooty Antbird               | 0               | ridge      | ridge0-1     | 1                     | 6:50:00 AM  |
| Thamnophilidae | <i>Hylophylax</i>     | <i>naevioides</i>     | (Lafresnaye, 1847)          | Spotted Antbird             | 5               | ridge      | ridge>3      | 1                     | 8:00:00 AM  |
| Thamnophilidae | <i>Hylophylax</i>     | <i>naevius</i>        | (Gmelin, 1789)              | Spot-backed Antbird         | 0               | ridge      | ridge0-1     | 1                     | 11:30:00 AM |
| Thamnophilidae | <i>Hylophylax</i>     | <i>naevius</i>        | (Gmelin, 1789)              | Spot-backed Antbird         | 0               | valley     | valley0-1    | 3                     | 9:00:00 AM  |
| Thamnophilidae | <i>Hylophylax</i>     | <i>naevius</i>        | (Gmelin, 1789)              | Spot-backed Antbird         | 1               | ridge      | ridge1-2     | 1                     | 8:15:00 AM  |
| Thamnophilidae | <i>Hylophylax</i>     | <i>naevius</i>        | (Gmelin, 1789)              | Spot-backed Antbird         | 0               | ridge      | ridge0-1     | 1                     | 6:15:00 AM  |
| Thamnophilidae | <i>Hylophylax</i>     | <i>naevius</i>        | (Gmelin, 1789)              | Spot-backed Antbird         | 0               | ridge      | ridge0-1     | 2                     | 8:12:00 AM  |
| Thamnophilidae | <i>Hylophylax</i>     | <i>naevius</i>        | (Gmelin, 1789)              | Spot-backed Antbird         | 0               | valley     | valley0-1    | 1                     | 9:41:00 AM  |
| Thamnophilidae | <i>Hylophylax</i>     | <i>naevius</i>        | (Gmelin, 1789)              | Spot-backed Antbird         | 1               | valley     | valley1-2    | 2                     | 2:25:00 PM  |
| Thamnophilidae | <i>Hylophylax</i>     | <i>naevius</i>        | (Gmelin, 1789)              | Spot-backed Antbird         | 0               | ridge      | ridge0-1     | 1                     | 4:00:00 PM  |
| Thamnophilidae | <i>Hylophylax</i>     | <i>naevius</i>        | (Gmelin, 1789)              | Spot-backed Antbird         | 2               | ridge      | ridge2-3     | 1                     | 8:54:00 AM  |
| Thamnophilidae | <i>Hylophylax</i>     | <i>punctulatus</i>    | (Des Murs, 1856)            | Dot-backed Antbird          | 0               | valley     | valley0-1    | 1                     | 6:35:00 AM  |
| Thamnophilidae | <i>Hylophylax</i>     | <i>punctulatus</i>    | (Des Murs, 1856)            | Dot-backed Antbird          | 2               | valley     | valley2-3    | 2                     |             |
| Thamnophilidae | <i>Hylophylax</i>     | <i>punctulatus</i>    | (Des Murs, 1856)            | Dot-backed Antbird          | 0               | valley     | valley0-1    | 2                     | 2:15:00 PM  |
| Thamnophilidae | <i>Hylophylax</i>     | <i>punctulatus</i>    | (Des Murs, 1856)            | Dot-backed Antbird          | 0               | valley     | valley0-1    | 1                     | 10:55:00 AM |
| Thamnophilidae | <i>Hylophylax</i>     | <i>punctulatus</i>    | (Des Murs, 1856)            | Dot-backed Antbird          | 3               | valley     | valley>3     | 1                     | 7:30:00 AM  |
| Thamnophilidae | <i>Hylophylax</i>     | <i>punctulatus</i>    | (Des Murs, 1856)            | Dot-backed Antbird          | 1               | valley     | valley1-2    | 1                     | 7:30:00 AM  |
| Thamnophilidae | <i>Hylophylax</i>     | <i>punctulatus</i>    | (Des Murs, 1856)            | Dot-backed Antbird          | 5               | valley     | valley>3     | 1                     | 8:08:00 AM  |
| Thamnophilidae | <i>Hypocnemis</i>     | <i>peruviana</i>      | (Taczanowski, 1884)         | Peruvian Warbling-Antbird   | 3               | ridge      | ridge>3      | 2                     | 3:15:00 PM  |
| Thamnophilidae | <i>Isleria</i>        | <i>hauxwelli</i>      | (Sclater, 1857)             | Plain-throated Antwren      | 2               | ridge      | ridge2-3     | 1                     | 4:30:00 PM  |
| Thamnophilidae | <i>Isleria</i>        | <i>hauxwelli</i>      | (Sclater, 1857)             | Plain-throated Antwren      | 5               | valley     | valley>3     | 1                     | 11:50:00 AM |
| Thamnophilidae | <i>Isleria</i>        | <i>hauxwelli</i>      | (Sclater, 1857)             | Plain-throated Antwren      | 2               | valley     | valley2-3    | 2                     | 8:30:00 AM  |
| Thamnophilidae | <i>Isleria</i>        | <i>hauxwelli</i>      | (Sclater, 1857)             | Plain-throated Antwren      | 2               | valley     | valley2-3    | 1                     | 9:15:00 AM  |
| Thamnophilidae | <i>Myrmelastes</i>    | <i>hyperythrus</i>    | (Sclater, 1855)             | Plumbeous Antbird           | 2               | valley     | valley2-3    | 1                     | 6:10:00 AM  |
| Thamnophilidae | <i>Myrmelastes</i>    | <i>leucostigma</i>    | (Pelzeln, 1868)             | Spot-winged Antbird         | 2               | ridge      | ridge2-3     | 2                     | 9:29:00 AM  |
| Thamnophilidae | <i>Myrmelastes</i>    | <i>leucostigma</i>    | (Pelzeln, 1868)             | Spot-winged Antbird         | 0               | valley     | valley0-1    | 2                     | 8:12:00 AM  |
| Thamnophilidae | <i>Myrmelastes</i>    | <i>leucostigma</i>    | (Pelzeln, 1868)             | Spot-winged Antbird         | 6               | ridge      | ridge>3      | 2                     | 1:30:00 PM  |
| Thamnophilidae | <i>Myrmelastes</i>    | <i>leucostigma</i>    | (Pelzeln, 1868)             | Spot-winged Antbird         | 2               | ridge      | ridge2-3     | 1                     | 12:30:00 PM |
| Thamnophilidae | <i>Myrmelastes</i>    | <i>leucostigma</i>    | (Pelzeln, 1868)             | Spot-winged Antbird         | 3               | ridge      | ridge>3      | 1                     | 1:15:00 PM  |
| Thamnophilidae | <i>Myrmelastes</i>    | <i>leucostigma</i>    | (Pelzeln, 1868)             | Spot-winged Antbird         | 0               | ridge      | ridge0-1     | 1                     | 7:00:00 AM  |

| Family         | Genus               | Species             | Authority                   | Common name                | Flight height/m | Topography | Microhabitat | Number of individuals | Time        |
|----------------|---------------------|---------------------|-----------------------------|----------------------------|-----------------|------------|--------------|-----------------------|-------------|
| Thamnophilidae | <i>Myrmelastes</i>  | <i>leucostigma</i>  | (Pelzeln, 1868)             | Spot-winged Antbird        | 1               | valley     | valley1-2    | 1                     | 7:21:00 AM  |
| Thamnophilidae | <i>Myrmelastes</i>  | <i>leucostigma</i>  | (Pelzeln, 1868)             | Spot-winged Antbird        | 3               | valley     | valley>3     | 2                     | 7:15:00 AM  |
| Thamnophilidae | <i>Myrmelastes</i>  | <i>leucostigma</i>  | (Pelzeln, 1868)             | Spot-winged Antbird        | 2               | valley     | valley2-3    | 3                     |             |
| Thamnophilidae | <i>Myrmelastes</i>  | <i>leucostigma</i>  | (Pelzeln, 1868)             | Spot-winged Antbird        | 2               | valley     | valley2-3    | 1                     | 2:40:00 PM  |
| Thamnophilidae | <i>Myrmelastes</i>  | <i>leucostigma</i>  | (Pelzeln, 1868)             | Spot-winged Antbird        | 2               | ridge      | ridge2-3     | 2                     | 12:40:00 PM |
| Thamnophilidae | <i>Myrmelastes</i>  | <i>leucostigma</i>  | (Pelzeln, 1868)             | Spot-winged Antbird        | 2               | ridge      | ridge2-3     | 1                     | 11:30:00 AM |
| Thamnophilidae | <i>Myrmelastes</i>  | <i>leucostigma</i>  | (Pelzeln, 1868)             | Spot-winged Antbird        | 0               | ridge      | ridge0-1     | 1                     | 8:00:00 AM  |
| Thamnophilidae | <i>Myrmelastes</i>  | <i>leucostigma</i>  | (Pelzeln, 1868)             | Spot-winged Antbird        | 1               | valley     | valley1-2    | 2                     | 9:05:00 AM  |
| Thamnophilidae | <i>Myrmelastes</i>  | <i>leucostigma</i>  | (Pelzeln, 1868)             | Spot-winged Antbird        | 2               | ridge      | ridge2-3     | 1                     | 6:50:00 AM  |
| Thamnophilidae | <i>Myrmelastes</i>  | <i>leucostigma</i>  | (Pelzeln, 1868)             | Spot-winged Antbird        | 0               | valley     | valley0-1    | 2                     | 3:25:00 PM  |
| Thamnophilidae | <i>Myrmoborus</i>   | <i>myotherinus</i>  | (Spix, 1825)                | Black-faced Antbird        | 0               | ridge      | ridge0-1     | 5                     |             |
| Thamnophilidae | <i>Myrmoborus</i>   | <i>myotherinus</i>  | (Spix, 1825)                | Black-faced Antbird        | 4               | valley     | valley>3     | 1                     | 9:02:00 AM  |
| Thamnophilidae | <i>Myrmoborus</i>   | <i>myotherinus</i>  | (Spix, 1825)                | Black-faced Antbird        | 0               | ridge      | ridge0-1     | 2                     | 6:20:00 AM  |
| Thamnophilidae | <i>Myrmoborus</i>   | <i>myotherinus</i>  | (Spix, 1825)                | Black-faced Antbird        | 1               | valley     | valley1-2    | 1                     | 8:25:00 AM  |
| Thamnophilidae | <i>Myrmoborus</i>   | <i>myotherinus</i>  | (Spix, 1825)                | Black-faced Antbird        | 0               | ridge      | ridge0-1     | 1                     | 8:15:00 AM  |
| Thamnophilidae | <i>Myrmoborus</i>   | <i>myotherinus</i>  | (Spix, 1825)                | Black-faced Antbird        | 6               | ridge      | ridge>3      | 2                     | 1:30:00 PM  |
| Thamnophilidae | <i>Myrmoborus</i>   | <i>myotherinus</i>  | (Spix, 1825)                | Black-faced Antbird        | 2               | ridge      | ridge2-3     | 1                     | 7:25:00 AM  |
| Thamnophilidae | <i>Myrmoborus</i>   | <i>myotherinus</i>  | (Spix, 1825)                | Black-faced Antbird        | 3               | valley     | valley>3     | 2                     | 8:07:00 AM  |
| Thamnophilidae | <i>Myrmoborus</i>   | <i>myotherinus</i>  | (Spix, 1825)                | Black-faced Antbird        | 2               | valley     | valley2-3    | 1                     | 8:30:00 AM  |
| Thamnophilidae | <i>Myrmophylax</i>  | <i>atrothorax</i>   | (Boddaert, 1783)            | Black-throated Antbird     | 1               | valley     | valley1-2    | 1                     | 2:40:00 PM  |
| Thamnophilidae | <i>Myrmophylax</i>  | <i>atrothorax</i>   | (Boddaert, 1783)            | Black-throated Antbird     | 1               | valley     | valley1-2    | 2                     | 2:00:00 PM  |
| Thamnophilidae | <i>Myrmophylax</i>  | <i>atrothorax</i>   | (Boddaert, 1783)            | Black-throated Antbird     | 2               | valley     | valley2-3    | 2                     | 8:30:00 AM  |
| Thamnophilidae | <i>Myrmophylax</i>  | <i>atrothorax</i>   | (Boddaert, 1783)            | Black-throated Antbird     | 2               | ridge      | ridge2-3     | 1                     | 8:00:00 PM  |
| Thamnophilidae | <i>Myrmophylax</i>  | <i>atrothorax</i>   | (Boddaert, 1783)            | Black-throated Antbird     | 0               | valley     | valley0-1    | 1                     | 8:42:00 AM  |
| Thamnophilidae | <i>Myrmotherula</i> | <i>axillaris</i>    | (Vieillot, 1817)            | White-flanked Antwren      | 12              | ridge      | ridge>3      | 1                     | 7:57:00 AM  |
| Thamnophilidae | <i>Myrmotherula</i> | <i>axillaris</i>    | (Vieillot, 1817)            | White-flanked Antwren      | 2               | valley     | valley2-3    | 1                     | 8:40:00 AM  |
| Thamnophilidae | <i>Myrmotherula</i> | <i>axillaris</i>    | (Vieillot, 1817)            | White-flanked Antwren      | 8               | valley     | valley>3     | 2                     | 9:56:00 AM  |
| Thamnophilidae | <i>Myrmotherula</i> | <i>axillaris</i>    | (Vieillot, 1817)            | White-flanked Antwren      | 5               | valley     | valley>3     | 1                     | 12:20:00 PM |
| Thamnophilidae | <i>Myrmotherula</i> | <i>axillaris</i>    | (Vieillot, 1817)            | White-flanked Antwren      | 0               | valley     | valley0-1    | 2                     | 7:56:00 AM  |
| Thamnophilidae | <i>Myrmotherula</i> | <i>axillaris</i>    | (Vieillot, 1817)            | White-flanked Antwren      | 3               | ridge      | ridge>3      | 1                     | 8:40:00 AM  |
| Thamnophilidae | <i>Myrmotherula</i> | <i>axillaris</i>    | (Vieillot, 1817)            | White-flanked Antwren      | 2               | valley     | valley2-3    | 5                     | 2:00:00 PM  |
| Thamnophilidae | <i>Myrmotherula</i> | <i>behni</i>        | Berlepsch & Leverkusn, 1890 | Plain-winged Antwren       | 5               | valley     | valley>3     | 1                     | 9:15:00 AM  |
| Thamnophilidae | <i>Myrmotherula</i> | <i>longipennis</i>  | Pelzeln, 1868               | Long-winged Antwren        | 4               | valley     | valley>3     | 1                     | 8:40:00 AM  |
| Thamnophilidae | <i>Myrmotherula</i> | <i>longipennis</i>  | Pelzeln, 1868               | Long-winged Antwren        | 2               | ridge      | ridge2-3     | 1                     | 6:50:00 AM  |
| Thamnophilidae | <i>Myrmotherula</i> | <i>longipennis</i>  | Pelzeln, 1868               | Long-winged Antwren        | 0               | valley     | valley0-1    | 1                     | 8:19:00 AM  |
| Thamnophilidae | <i>Myrmotherula</i> | <i>longipennis</i>  | Pelzeln, 1868               | Long-winged Antwren        | 15              | valley     | valley>3     | 3                     | 4:35:00 PM  |
| Thamnophilidae | <i>Myrmotherula</i> | <i>longipennis</i>  | Pelzeln, 1868               | Long-winged Antwren        | 8               | valley     | valley>3     | 2                     | 9:15:00 AM  |
| Thamnophilidae | <i>Myrmotherula</i> | <i>menetriesii</i>  | (D'Orbigny, 1837)           | Gray Antwren               | 2               | valley     | valley2-3    | 2                     | 10:00:00 AM |
| Thamnophilidae | <i>Myrmotherula</i> | <i>menetriesii</i>  | (D'Orbigny, 1837)           | Gray Antwren               | 5               | valley     | valley>3     | 1                     | 11:50:00 AM |
| Thamnophilidae | <i>Myrmotherula</i> | <i>schisticolor</i> | (Lawrence, 1865)            | Slaty Antwren              | 2               | valley     | valley2-3    | 1                     | 11:55:00 AM |
| Thamnophilidae | <i>Pithys</i>       | <i>albifrons</i>    | (Linnaeus, 1766)            | White-plumed Antbird       | 0               | valley     | valley0-1    | 2                     | 2:40:00 PM  |
| Thamnophilidae | <i>Pithys</i>       | <i>albifrons</i>    | (Linnaeus, 1766)            | White-plumed Antbird       | 0               | valley     | valley0-1    | 1                     | 10:45:00 AM |
| Thamnophilidae | <i>Pithys</i>       | <i>albifrons</i>    | (Linnaeus, 1766)            | White-plumed Antbird       | 2               | valley     | valley2-3    | 1                     | 9:55:00 AM  |
| Thamnophilidae | <i>Pithys</i>       | <i>albifrons</i>    | (Linnaeus, 1766)            | White-plumed Antbird       | 1               | ridge      | ridge1-2     | 1                     | 10:50:00 AM |
| Thamnophilidae | <i>Pithys</i>       | <i>albifrons</i>    | (Linnaeus, 1766)            | White-plumed Antbird       | 2               | valley     | valley2-3    | 1                     | 11:11:00 AM |
| Thamnophilidae | <i>Pithys</i>       | <i>albifrons</i>    | (Linnaeus, 1766)            | White-plumed Antbird       | 1               | valley     | valley1-2    | 1                     | 7:40:00 AM  |
| Thamnophilidae | <i>Pygiptila</i>    | <i>stellaris</i>    | (Spix, 1825)                | Spot-winged Antshrike      | 0               | valley     | valley0-1    | 1                     | 6:30:00 AM  |
| Thamnophilidae | <i>Pygiptila</i>    | <i>stellaris</i>    | (Spix, 1825)                | Spot-winged Antshrike      | 0               | valley     | valley0-1    | 1                     | 6:38:00 AM  |
| Thamnophilidae | <i>Pygiptila</i>    | <i>stellaris</i>    | (Spix, 1825)                | Spot-winged Antshrike      | 5               | valley     | valley>3     | 1                     | 12:20:00 PM |
| Thamnophilidae | <i>Thamnomanes</i>  | <i>ardesiacus</i>   | (Sclater & Salvin, 1868)    | Dusky-throated Antshrike   | 1               | ridge      | ridge1-2     | 1                     | 11:00:00 AM |
| Thamnophilidae | <i>Thamnomanes</i>  | <i>ardesiacus</i>   | (Sclater & Salvin, 1868)    | Dusky-throated Antshrike   | 2               | ridge      | ridge2-3     | 2                     | 1:15:00 PM  |
| Thamnophilidae | <i>Thamnomanes</i>  | <i>ardesiacus</i>   | (Sclater & Salvin, 1868)    | Dusky-throated Antshrike   | 2               | ridge      | ridge2-3     | 1                     | 12:50:00 PM |
| Thamnophilidae | <i>Thamnomanes</i>  | <i>ardesiacus</i>   | (Sclater & Salvin, 1868)    | Dusky-throated Antshrike   | 2               | valley     | valley2-3    | 2                     | 1:40:00 PM  |
| Thamnophilidae | <i>Thamnomanes</i>  | <i>ardesiacus</i>   | (Sclater & Salvin, 1868)    | Dusky-throated Antshrike   | 2               | valley     | valley2-3    | 1                     | 7:21:00 AM  |
| Thamnophilidae | <i>Thamnomanes</i>  | <i>ardesiacus</i>   | (Sclater & Salvin, 1868)    | Dusky-throated Antshrike   | 0               | ridge      | ridge0-1     | 2                     | 6:30:00 AM  |
| Thamnophilidae | <i>Thamnomanes</i>  | <i>ardesiacus</i>   | (Sclater & Salvin, 1868)    | Dusky-throated Antshrike   | 4               | ridge      | ridge>3      | 2                     | 6:18:00 AM  |
| Thamnophilidae | <i>Thamnomanes</i>  | <i>ardesiacus</i>   | (Sclater & Salvin, 1868)    | Dusky-throated Antshrike   | 0               | valley     | valley0-1    | 1                     | 6:37:00 AM  |
| Thamnophilidae | <i>Thamnomanes</i>  | <i>ardesiacus</i>   | (Sclater & Salvin, 1868)    | Dusky-throated Antshrike   | 0               | ridge      | ridge0-1     | 2                     | 8:21:00 AM  |
| Thamnophilidae | <i>Thamnomanes</i>  | <i>ardesiacus</i>   | (Sclater & Salvin, 1868)    | Dusky-throated Antshrike   | 5               | valley     | valley>3     | 1                     | 7:52:00 AM  |
| Thamnophilidae | <i>Thamnomanes</i>  | <i>ardesiacus</i>   | (Sclater & Salvin, 1868)    | Dusky-throated Antshrike   | 0               | valley     | valley0-1    | 1                     | 9:50:00 AM  |
| Thamnophilidae | <i>Thamnomanes</i>  | <i>caesius</i>      | (Temminck, 1820)            | Cinereous Antshrike        | 0               | ridge      | ridge0-1     | 1                     | 7:19:00 AM  |
| Thamnophilidae | <i>Thamnophilus</i> | <i>aethiops</i>     | Sclater, 1858               | White-shouldered Antshrike | 4               | ridge      | ridge>3      | 2                     | 8:00:00 AM  |
| Thamnophilidae | <i>Thamnophilus</i> | <i>aethiops</i>     | Sclater, 1858               | White-shouldered Antshrike | 4               | ridge      | ridge>3      | 1                     | 10:15:00 AM |
| Thamnophilidae | <i>Thamnophilus</i> | <i>murinus</i>      | Sclater & Salvin, 1867      | Mouse-colored Antshrike    | 4               | valley     | valley>3     | 1                     | 6:40:00 AM  |
| Thamnophilidae | <i>Thamnophilus</i> | <i>murinus</i>      | Sclater & Salvin, 1867      | Mouse-colored Antshrike    | 1               | ridge      | ridge1-2     | 1                     | 7:10:00 AM  |
| Thamnophilidae | <i>Thamnophilus</i> | <i>murinus</i>      | Sclater & Salvin, 1867      | Mouse-colored Antshrike    | 0               | ridge      | ridge0-1     | 1                     | 8:00:00 AM  |
| Thamnophilidae | <i>Thamnophilus</i> | <i>murinus</i>      | Sclater & Salvin, 1867      | Mouse-colored Antshrike    | 0               | ridge      | ridge0-1     | 2                     | 8:15:00 AM  |
| Thamnophilidae | <i>Thamnophilus</i> | <i>murinus</i>      | Sclater & Salvin, 1867      | Mouse-colored Antshrike    | 2               | ridge      | ridge2-3     | 1                     | 4:35:00 PM  |
| Thamnophilidae | <i>Thamnophilus</i> | <i>murinus</i>      | Sclater & Salvin, 1867      | Mouse-colored Antshrike    | 8               | ridge      | ridge>3      | 1                     | 7:00:00 AM  |
| Thamnophilidae | <i>Thamnophilus</i> | <i>schistaceus</i>  | d'Orbigny, 1835             | Plain-winged Antshrike     | 2               | valley     | valley2-3    | 3                     | 9:00:00 AM  |
| Thamnophilidae | <i>Thamnophilus</i> | <i>schistaceus</i>  | d'Orbigny, 1835             | Plain-winged Antshrike     | 9               | ridge      | ridge>3      | 1                     | 6:25:00 AM  |
| Thamnophilidae | <i>Thamnophilus</i> | <i>schistaceus</i>  | d'Orbigny, 1835             | Plain-winged Antshrike     | 2               | ridge      | ridge2-3     | 1                     | 7:45:00 AM  |
| Thamnophilidae | <i>Thamnophilus</i> | <i>schistaceus</i>  | d'Orbigny, 1835             | Plain-winged Antshrike     | 12              | ridge      | ridge>3      | 1                     | 7:00:00 AM  |
| Thamnophilidae | <i>Thamnophilus</i> | <i>schistaceus</i>  | d'Orbigny, 1835             | Plain-winged Antshrike     | 10              | ridge      | ridge>3      | 1                     | 7:02:00 AM  |
| Thamnophilidae | <i>Thamnophilus</i> | <i>schistaceus</i>  | d'Orbigny, 1835             | Plain-winged Antshrike     | 2               | ridge      | ridge2-3     | 1                     | 12:30:00 PM |
| Thamnophilidae | <i>Thamnophilus</i> | <i>schistaceus</i>  | d'Orbigny, 1835             | Plain-winged Antshrike     | 4               | ridge      | ridge>3      | 1                     | 6:20:00 AM  |
| Thamnophilidae | <i>Thamnophilus</i> | <i>schistaceus</i>  | d'Orbigny, 1835             | Plain-winged Antshrike     | 8               | ridge      | ridge>3      | 1                     | 6:50:00 AM  |
| Thamnophilidae | <i>Thamnophilus</i> | <i>schistaceus</i>  | d'Orbigny, 1835             | Plain-winged Antshrike     | 8               | ridge      | ridge>3      | 2                     | 8:00:00 AM  |
| Thamnophilidae | <i>Thamnophilus</i> | <i>schistaceus</i>  | d'Orbigny, 1835             | Plain-winged Antshrike     | 2               | valley     | valley2-3    | 2                     | 10:00:00 AM |
| Thamnophilidae | <i>Thamnophilus</i> | <i>schistaceus</i>  | d'Orbigny, 1835             | Plain-winged Antshrike     | 10              | valley     | valley>3     | 1                     | 8:30:00 AM  |
| Thamnophilidae | <i>Thamnophilus</i> | <i>schistaceus</i>  | d'Orbigny, 1835             | Plain-winged Antshrike     | 8               | valley     | valley>3     | 2                     | 12:00:00 PM |
| Thamnophilidae | <i>Thamnophilus</i> | <i>schistaceus</i>  | d'Orbigny, 1835             | Plain-winged Antshrike     | 3               | ridge      | ridge>3      | 1                     | 10:12:00 AM |
| Thamnophilidae | <i>Thamnophilus</i> | <i>schistaceus</i>  | d'Orbigny, 1835             | Plain-winged Antshrike     | 9               | ridge      | ridge>3      | 1                     | 12:40:00 PM |
| Thamnophilidae | <i>Thamnophilus</i> | <i>schistaceus</i>  | d'Orbigny, 1835             | Plain-winged Antshrike     | 15              | ridge      | ridge>3      | 1                     | 8:00:00 AM  |



| Family         | Genus                  | Species             | Authority                | Common name                 | Flight height/m | Topography | Microhabitat | Number of individuals | Time        |
|----------------|------------------------|---------------------|--------------------------|-----------------------------|-----------------|------------|--------------|-----------------------|-------------|
| Thamnophilidae | <i>Thamnophilus</i>    | <i>schistaceus</i>  | d'Orbigny, 1835          | Plain-winged Antshrike      | 8               | ridge      | ridge>3      | 1                     | 11:10:00 AM |
| Thamnophilidae | <i>Thamnophilus</i>    | <i>schistaceus</i>  | d'Orbigny, 1835          | Plain-winged Antshrike      | 1               | ridge      | ridge1-2     | 1                     | 8:40:00 AM  |
| Thamnophilidae | <i>Thamnophilus</i>    | <i>schistaceus</i>  | d'Orbigny, 1835          | Plain-winged Antshrike      | 10              | ridge      | ridge>3      | 1                     | 4:35:00 PM  |
| Thamnophilidae | <i>Willisornis</i>     | <i>poecilinotus</i> | (Cabanis, 1847)          | Common Scale-backed Antbird | 0               | ridge      | ridge0-1     | 3                     | 6:18:00 AM  |
| Thamnophilidae | <i>Willisornis</i>     | <i>poecilinotus</i> | (Cabanis, 1847)          | Common Scale-backed Antbird | 1               | valley     | valley1-2    | 2                     | 2:40:00 PM  |
| Thamnophilidae | <i>Willisornis</i>     | <i>poecilinotus</i> | (Cabanis, 1847)          | Common Scale-backed Antbird | 2               | valley     | valley2-3    | 1                     | 8:30:00 AM  |
| Thamnophilidae | <i>Willisornis</i>     | <i>poecilinotus</i> | (Cabanis, 1847)          | Common Scale-backed Antbird | 1               | ridge      | ridge1-2     | 1                     | 9:25:00 AM  |
| Thraupidae     | <i>Cissopis</i>        | <i>leverianus</i>   | (Gmelin, 1788)           | Magpie Tanager              | 12              | valley     | valley>3     | 1                     | 9:15:00 AM  |
| Thraupidae     | <i>Cissopis</i>        | <i>leverianus</i>   | (Gmelin, 1788)           | Magpie Tanager              | 3               | valley     | valley>3     | 2                     | 10:00:00 AM |
| Thraupidae     | <i>Dacnis</i>          | <i>cayana</i>       | (Linnaeus, 1766)         | Blue Dacnis                 | 20              | ridge      | ridge>3      | 2                     | 8:12:00 AM  |
| Thraupidae     | <i>Dacnis</i>          | <i>cayana</i>       | (Linnaeus, 1766)         | Blue Dacnis                 | 10              | ridge      | ridge>3      | 1                     | 8:10:00 AM  |
| Thraupidae     | <i>Dacnis</i>          | <i>lineata</i>      | (Gmelin, 1789)           | Black-faced Dacnis          | 20              | ridge      | ridge>3      | 1                     | 6:25:00 AM  |
| Thraupidae     | <i>Dacnis</i>          | <i>lineata</i>      | (Gmelin, 1789)           | Black-faced Dacnis          | 20              | ridge      | ridge>3      | 1                     | 7:45:00 AM  |
| Thraupidae     | <i>Lanio</i>           | <i>fulvus</i>       | (Boddaert, 1783)         | Fulvous Shrike-tanager      | 4               | ridge      | ridge>3      | 2                     | 11:10:00 AM |
| Thraupidae     | <i>Lanio</i>           | <i>fulvus</i>       | (Boddaert, 1783)         | Fulvous Shrike-tanager      | 4               | valley     | valley>3     | 1                     | 8:20:00 AM  |
| Thraupidae     | <i>Lanio</i>           | <i>fulvus</i>       | (Boddaert, 1783)         | Fulvous Shrike-tanager      | 3               | ridge      | ridge>3      | 2                     | 4:30:00 PM  |
| Thraupidae     | <i>Tangara</i>         | <i>callophrys</i>   | (Cabanis, 1849)          | Opal-crowned Tanager        | 25              | valley     | valley>3     | 1                     | 7:00:00 AM  |
| Thraupidae     | <i>Tangara</i>         | <i>chilensis</i>    | (Vigors, 1832)           | Paradise Tanager            | 10              | valley     | valley>3     | 4                     | 10:10:00 AM |
| Thraupidae     | <i>Tangara</i>         | <i>chilensis</i>    | (Vigors, 1832)           | Paradise Tanager            | 19              | valley     | valley>3     | 1                     | 7:30:00 AM  |
| Thraupidae     | <i>Tangara</i>         | <i>chilensis</i>    | (Vigors, 1832)           | Paradise Tanager            | 15              | valley     | valley>3     | 3                     | 1:20:00 PM  |
| Thraupidae     | <i>Tangara</i>         | <i>chilensis</i>    | (Vigors, 1832)           | Paradise Tanager            | 17              | ridge      | ridge>3      | 3                     | 6:30:00 AM  |
| Thraupidae     | <i>Tangara</i>         | <i>chilensis</i>    | (Vigors, 1832)           | Paradise Tanager            | 17              | valley     | valley>3     | 1                     | 10:13:00 AM |
| Thraupidae     | <i>Tangara</i>         | <i>gyrola</i>       | (Linnaeus, 1758)         | Bay-headed Tanager          | 8               | valley     | valley>3     | 1                     | 11:50:00 AM |
| Thraupidae     | <i>Tangara</i>         | <i>gyrola</i>       | (Linnaeus, 1758)         | Bay-headed Tanager          | 18              | valley     | valley>3     | 2                     | 9:50:00 AM  |
| Thraupidae     | <i>Tangara</i>         | <i>schrunkii</i>    | (Spix, 1825)             | Green-and-gold Tanager      | 4               | valley     | valley>3     | 4                     | 9:00:00 AM  |
| Thraupidae     | <i>Tangara</i>         | <i>schrunkii</i>    | (Spix, 1825)             | Green-and-gold Tanager      | 3               | valley     | valley>3     | 1                     | 8:40:00 AM  |
| Thraupidae     | <i>Tangara</i>         | <i>schrunkii</i>    | (Spix, 1825)             | Green-and-gold Tanager      | 9               | ridge      | ridge>3      | 2                     | 12:40:00 PM |
| Thraupidae     | <i>Tangara</i>         | <i>schrunkii</i>    | (Spix, 1825)             | Green-and-gold Tanager      | 18              | valley     | valley>3     | 3                     | 9:50:00 AM  |
| Thraupidae     | <i>Tangara</i>         | <i>schrunkii</i>    | (Spix, 1825)             | Green-and-gold Tanager      | 8               | valley     | valley>3     | 1                     | 12:20:00 PM |
| Thraupidae     | <i>Tangara</i>         | <i>schrunkii</i>    | (Spix, 1825)             | Green-and-gold Tanager      | 8               | valley     | valley>3     | 1                     | 9:15:00 AM  |
| Thraupidae     | <i>Tangara</i>         | <i>schrunkii</i>    | (Spix, 1825)             | Green-and-gold Tanager      | 17              | valley     | valley>3     | 1                     | 10:15:00 AM |
| Thraupidae     | <i>Tangara</i>         | <i>schrunkii</i>    | (Spix, 1825)             | Green-and-gold Tanager      | 16              | valley     | valley>3     | 1                     | 9:15:00 AM  |
| Thraupidae     | <i>Tangara</i>         | <i>schrunkii</i>    | (Spix, 1825)             | Green-and-gold Tanager      | 25              | valley     | valley>3     | 1                     | 7:00:00 AM  |
| Thraupidae     | <i>Tangara</i>         | <i>schrunkii</i>    | (Spix, 1825)             | Green-and-gold Tanager      | 17              | ridge      | ridge>3      | 1                     | 12:30:00 PM |
| Thraupidae     | <i>Tangara</i>         | <i>schrunkii</i>    | (Spix, 1825)             | Green-and-gold Tanager      | 5               | valley     | valley>3     | 2                     | 2:25:00 PM  |
| Thraupidae     | <i>Tangara</i>         | <i>vela</i>         | (Linnaeus, 1758)         | Opal-rumped Tanager         | 20              | valley     | valley>3     | 1                     | 10:30:00 AM |
| Thraupidae     | <i>Tangara</i>         | <i>xanthogastra</i> | (Scater, 1851)           | Yellow-bellied Tanager      | 8               | valley     | valley>3     | 3                     | 11:50:00 AM |
| Thraupidae     | <i>Tersina</i>         | <i>viridis</i>      | (Illiger, 1811)          | Swallow Tanager             | 8               | valley     | valley>3     | 1                     | 9:15:00 AM  |
| Tityridae      | <i>Pachyrhamphus</i>   | <i>castaneus</i>    | (Jardine & Selby, 1827)  | Chestnut-crowned Becard     | 10              | ridge      | ridge>3      | 1                     | 7:45:00 AM  |
| Tityridae      | <i>Pachyrhamphus</i>   | <i>minor</i>        | (Lesson, 1830)           | Pink-throated Becard        | 18              | valley     | valley>3     | 2                     | 7:33:00 AM  |
| Tityridae      | <i>Pachyrhamphus</i>   | <i>minor</i>        | (Lesson, 1830)           | Pink-throated Becard        | 30              | ridge      | ridge>3      | 1                     | 8:30:00 AM  |
| Tityridae      | <i>Tityra</i>          | <i>cayana</i>       | (Linnaeus, 1766)         | Black-tailed Tityra         | 20              | valley     | valley>3     | 4                     | 7:30:00 AM  |
| Tityridae      | <i>Tityra</i>          | <i>inquisitor</i>   | (Lichtenstein, 1823)     | Black-crowned Tityra        | 25              | ridge      | ridge>3      | 2                     | 8:50:00 AM  |
| Troglodytidae  | <i>Campylorhynchus</i> | <i>turdinus</i>     | (Wied, 1821)             | Thrush-like Wren            | 12              | ridge      | ridge>3      | 1                     | 6:30:00 AM  |
| Troglodytidae  | <i>Campylorhynchus</i> | <i>turdinus</i>     | (Wied, 1821)             | Thrush-like Wren            | 8               | ridge      | ridge>3      | 1                     | 1:50:00 PM  |
| Troglodytidae  | <i>Campylorhynchus</i> | <i>turdinus</i>     | (Wied, 1821)             | Thrush-like Wren            | 10              | ridge      | ridge>3      | 1                     | 8:30:00 AM  |
| Troglodytidae  | <i>Campylorhynchus</i> | <i>turdinus</i>     | (Wied, 1821)             | Thrush-like Wren            | 25              | ridge      | ridge>3      | 1                     | 12:30:00 PM |
| Troglodytidae  | <i>Campylorhynchus</i> | <i>turdinus</i>     | (Wied, 1821)             | Thrush-like Wren            | 14              | ridge      | ridge>3      | 1                     | 9:18:00 AM  |
| Troglodytidae  | <i>Campylorhynchus</i> | <i>turdinus</i>     | (Wied, 1821)             | Thrush-like Wren            | 11              | ridge      | ridge>3      | 1                     | 11:30:00 AM |
| Troglodytidae  | <i>Campylorhynchus</i> | <i>turdinus</i>     | (Wied, 1821)             | Thrush-like Wren            | 15              | ridge      | ridge>3      | 1                     | 6:00:00 AM  |
| Troglodytidae  | <i>Campylorhynchus</i> | <i>turdinus</i>     | (Wied, 1821)             | Thrush-like Wren            | 14              | ridge      | ridge>3      | 1                     | 6:58:00 AM  |
| Troglodytidae  | <i>Campylorhynchus</i> | <i>turdinus</i>     | (Wied, 1821)             | Thrush-like Wren            | 8               | ridge      | ridge>3      | 1                     | 6:35:00 AM  |
| Troglodytidae  | <i>Campylorhynchus</i> | <i>turdinus</i>     | (Wied, 1821)             | Thrush-like Wren            | 1               | ridge      | ridge1-2     | 1                     | 7:45:00 AM  |
| Troglodytidae  | <i>Campylorhynchus</i> | <i>turdinus</i>     | (Wied, 1821)             | Thrush-like Wren            | 14              | valley     | valley>3     | 1                     | 3:55:00 PM  |
| Troglodytidae  | <i>Campylorhynchus</i> | <i>turdinus</i>     | (Wied, 1821)             | Thrush-like Wren            | 12              | valley     | valley>3     | 1                     | 6:00:00 AM  |
| Troglodytidae  | <i>Campylorhynchus</i> | <i>turdinus</i>     | (Wied, 1821)             | Thrush-like Wren            | 12              | ridge      | ridge>3      | 1                     | 8:22:00 AM  |
| Troglodytidae  | <i>Campylorhynchus</i> | <i>turdinus</i>     | (Wied, 1821)             | Thrush-like Wren            | 12              | valley     | valley>3     | 1                     | 9:25:00 AM  |
| Troglodytidae  | <i>Campylorhynchus</i> | <i>turdinus</i>     | (Wied, 1821)             | Thrush-like Wren            | 10              | ridge      | ridge>3      | 1                     | 4:00:00 PM  |
| Troglodytidae  | <i>Campylorhynchus</i> | <i>turdinus</i>     | (Wied, 1821)             | Thrush-like Wren            | 10              | ridge      | ridge>3      | 1                     | 8:05:00 AM  |
| Troglodytidae  | <i>Cyphorhinus</i>     | <i>arada</i>        | (Hermann, 1783)          | Musician Wren               | 12              | ridge      | ridge>3      | 1                     |             |
| Troglodytidae  | <i>Henicorhina</i>     | <i>leucosticta</i>  | (Cabanis, 1847)          | White-breasted Wood-Wren    | 17              | ridge      | ridge>3      | 1                     | 7:32:00 AM  |
| Troglodytidae  | <i>Microcerculus</i>   | <i>marginatus</i>   | (Scater, 1855)           | Scaly-breasted Wren         | 15              | valley     | valley>3     | 1                     | 7:00:00 AM  |
| Troglodytidae  | <i>Microcerculus</i>   | <i>marginatus</i>   | (Scater, 1855)           | Scaly-breasted Wren         | 2               | ridge      | ridge2-3     | 1                     | 8:37:00 AM  |
| Troglodytidae  | <i>Microcerculus</i>   | <i>marginatus</i>   | (Scater, 1855)           | Scaly-breasted Wren         | 7               | ridge      | ridge>3      | 1                     | 11:10:00 AM |
| Troglodytidae  | <i>Microcerculus</i>   | <i>marginatus</i>   | (Scater, 1855)           | Scaly-breasted Wren         | 4               | ridge      | ridge>3      | 1                     | 3:50:00 PM  |
| Troglodytidae  | <i>Microcerculus</i>   | <i>marginatus</i>   | (Scater, 1855)           | Scaly-breasted Wren         | 1               | ridge      | ridge1-2     | 1                     | 8:50:00 AM  |
| Troglodytidae  | <i>Microcerculus</i>   | <i>marginatus</i>   | (Scater, 1855)           | Scaly-breasted Wren         | 16              | ridge      | ridge>3      | 1                     | 6:50:00 AM  |
| Troglodytidae  | <i>Microcerculus</i>   | <i>marginatus</i>   | (Scater, 1855)           | Scaly-breasted Wren         | 4               | valley     | valley>3     | 1                     | 2:20:00 PM  |
| Troglodytidae  | <i>Microcerculus</i>   | <i>marginatus</i>   | (Scater, 1855)           | Scaly-breasted Wren         | 3               | ridge      | ridge>3      | 1                     | 6:45:00 AM  |
| Troglodytidae  | <i>Microcerculus</i>   | <i>marginatus</i>   | (Scater, 1855)           | Scaly-breasted Wren         | 8               | ridge      | ridge>3      | 1                     | 11:10:00 AM |
| Troglodytidae  | <i>Microcerculus</i>   | <i>marginatus</i>   | (Scater, 1855)           | Scaly-breasted Wren         | 18              | ridge      | ridge>3      | 1                     | 6:50:00 AM  |
| Troglodytidae  | <i>Microcerculus</i>   | <i>marginatus</i>   | (Scater, 1855)           | Scaly-breasted Wren         | 8               | valley     | valley>3     | 1                     | 4:39:00 PM  |
| Troglodytidae  | <i>Microcerculus</i>   | <i>marginatus</i>   | (Scater, 1855)           | Scaly-breasted Wren         | 2               | ridge      | ridge2-3     | 1                     | 7:17:00 AM  |
| Troglodytidae  | <i>Microcerculus</i>   | <i>marginatus</i>   | (Scater, 1855)           | Scaly-breasted Wren         | 12              | valley     | valley>3     | 1                     | 9:12:00 AM  |
| Troglodytidae  | <i>Microcerculus</i>   | <i>marginatus</i>   | (Scater, 1855)           | Scaly-breasted Wren         | 2               | valley     | valley2-3    | 1                     | 6:42:00 AM  |
| Troglodytidae  | <i>Microcerculus</i>   | <i>marginatus</i>   | (Scater, 1855)           | Scaly-breasted Wren         | 1               | valley     | valley1-2    | 1                     | 9:50:00 AM  |
| Troglodytidae  | <i>Pheugopedius</i>    | <i>coraya</i>       | (Gmelin, 1789)           | Coraya Wren                 | 5               | ridge      | ridge>3      | 1                     | 2:09:00 PM  |
| Trogonidae     | <i>Trogon</i>          | <i>melanurus</i>    | Swainson, 1838           | Black-tailed Trogon         | 18              | ridge      | ridge>3      | 1                     | 12:30:00 PM |
| Trogonidae     | <i>Trogon</i>          | <i>melanurus</i>    | Swainson, 1838           | Black-tailed Trogon         | 13              | ridge      | ridge>3      | 1                     | 12:40:00 PM |
| Trogonidae     | <i>Trogon</i>          | <i>ramonianus</i>   | Deville & Des Murs, 1849 | Amazonian Trogon            | 12              | valley     | valley>3     | 2                     | 7:20:00 AM  |
| Trogonidae     | <i>Trogon</i>          | <i>ramonianus</i>   | Deville & Des Murs, 1849 | Amazonian Trogon            | 17              | valley     | valley>3     | 1                     | 3:11:00 PM  |
| Trogonidae     | <i>Trogon</i>          | <i>viridis</i>      | Linnaeus, 1766           | Green-backed Trogon         | 14              | ridge      | ridge>3      | 1                     | 12:26:00 PM |
| Trogonidae     | <i>Trogon</i>          | <i>viridis</i>      | Linnaeus, 1766           | Green-backed Trogon         | 10              | ridge      | ridge>3      | 3                     | 9:45:00 AM  |
| Trogonidae     | <i>Trogon</i>          | <i>viridis</i>      | Linnaeus, 1766           | Green-backed Trogon         | 15              | valley     | valley>3     | 1                     | 7:50:00 AM  |

| Family     | Genus                 | Species              | Authority            | Common name               | Flight height/m | Topography | Microhabitat | Number of individuals | Time        |
|------------|-----------------------|----------------------|----------------------|---------------------------|-----------------|------------|--------------|-----------------------|-------------|
| Trogonidae | <i>Trogon</i>         | <i>viridis</i>       | Linnaeus, 1766       | Green-backed Trogon       | 18              | valley     | valley>3     | 1                     | 10:58:00 AM |
| Trogonidae | <i>Trogon</i>         | <i>viridis</i>       | Linnaeus, 1766       | Green-backed Trogon       | 17              | ridge      | ridge>3      | 1                     | 6:53:00 AM  |
| Trogonidae | <i>Trogon</i>         | <i>viridis</i>       | Linnaeus, 1766       | Green-backed Trogon       | 3               | valley     | valley>3     | 2                     | 3:35:00 PM  |
| Trogonidae | <i>Trogon</i>         | <i>viridis</i>       | Linnaeus, 1766       | Green-backed Trogon       | 30              | ridge      | ridge>3      | 1                     | 8:30:00 AM  |
| Trogonidae | <i>Trogon</i>         | <i>viridis</i>       | Linnaeus, 1766       | Green-backed Trogon       | 17              | valley     | valley>3     | 1                     | 6:12:00 AM  |
| Trogonidae | <i>Trogon</i>         | <i>viridis</i>       | Linnaeus, 1766       | Green-backed Trogon       | 16              | ridge      | ridge>3      | 2                     | 7:55:00 AM  |
| Trogonidae | <i>Trogon</i>         | <i>viridis</i>       | Linnaeus, 1766       | Green-backed Trogon       | 14              | ridge      | ridge>3      | 1                     | 8:25:00 AM  |
| Turdidae   | <i>Turdus</i>         | <i>albicollis</i>    | Vieillot, 1818       | White-necked Thrush       | 10              | valley     | valley>3     | 1                     | 12:00:00 PM |
| Turdidae   | <i>Turdus</i>         | <i>albicollis</i>    | Vieillot, 1818       | White-necked Thrush       | 0               | ridge      | ridge0-1     | 1                     | 6:25:00 AM  |
| Turdidae   | <i>Turdus</i>         | <i>albicollis</i>    | Vieillot, 1818       | White-necked Thrush       | 3               | valley     | valley>3     | 1                     | 2:00:00 PM  |
| Turdidae   | <i>Turdus</i>         | <i>albicollis</i>    | Vieillot, 1818       | White-necked Thrush       | 3               | valley     | valley>3     | 1                     | 5:20:00 PM  |
| Turdidae   | <i>Turdus</i>         | <i>albicollis</i>    | Vieillot, 1818       | White-necked Thrush       | 10              | valley     | valley>3     | 1                     | 7:25:00 AM  |
| Turdidae   | <i>Turdus</i>         | <i>hauxwelli</i>     | Lawrence, 1869       | Hauxwell's Thrush         | 4               | ridge      | ridge>3      | 1                     | 7:24:00 AM  |
| Turdidae   | <i>Turdus</i>         | <i>ignobilis</i>     | Sclater, 1857        | Black-billed Thrush       | 18              | ridge      | ridge>3      | 1                     | 6:50:00 AM  |
| Turdidae   | <i>Turdus</i>         | <i>ignobilis</i>     | Sclater, 1857        | Black-billed Thrush       | 18              | ridge      | ridge>3      | 2                     | 1:50:00 PM  |
| Turdidae   | <i>Turdus</i>         | <i>ignobilis</i>     | Sclater, 1857        | Black-billed Thrush       | 17              | ridge      | ridge>3      | 1                     | 8:45:00 AM  |
| Turdidae   | <i>Turdus</i>         | <i>lawrencii</i>     | Coues, 1880          | Lawrence's Thrush         | 16              | ridge      | ridge>3      | 1                     | 6:50:00 AM  |
| Turdidae   | <i>Turdus</i>         | <i>lawrencii</i>     | Coues, 1880          | Lawrence's Thrush         | 8               | ridge      | ridge>3      | 1                     | 3:25:00 PM  |
| Turdidae   | <i>Turdus</i>         | <i>lawrencii</i>     | Coues, 1880          | Lawrence's Thrush         | 12              | ridge      | ridge>3      | 1                     | 6:35:00 AM  |
| Turdidae   | <i>Turdus</i>         | <i>lawrencii</i>     | Coues, 1880          | Lawrence's Thrush         | 14              | ridge      | ridge>3      | 1                     | 1:40:00 PM  |
| Turdidae   | <i>Turdus</i>         | <i>lawrencii</i>     | Coues, 1880          | Lawrence's Thrush         | 17              | valley     | valley>3     | 1                     | 7:15:00 AM  |
| Turdidae   | <i>Turdus</i>         | <i>lawrencii</i>     | Coues, 1880          | Lawrence's Thrush         | 12              | valley     | valley>3     | 1                     | 6:40:00 AM  |
| Turdidae   | <i>Turdus</i>         | <i>lawrencii</i>     | Coues, 1880          | Lawrence's Thrush         | 5               | ridge      | ridge>3      | 1                     | 4:25:00 PM  |
| Turdidae   | <i>Turdus</i>         | <i>lawrencii</i>     | Coues, 1880          | Lawrence's Thrush         | 12              | ridge      | ridge>3      | 1                     | 12:00:00 PM |
| Turdidae   | <i>Turdus</i>         | <i>lawrencii</i>     | Coues, 1880          | Lawrence's Thrush         | 10              | ridge      | ridge>3      | 1                     | 8:38:00 AM  |
| Tyrannidae | <i>Cnipodectes</i>    | <i>subbrunneus</i>   | (Sclater, 1860)      | Brownish Twistwing        | 2               | valley     | valley2-3    | 2                     | 8:00:00 AM  |
| Tyrannidae | <i>Contopus</i>       | <i>virens</i>        | (Linnaeus, 1766)     | Eastern Wood-pewee        | 4               | valley     | valley>3     | 1                     | 6:10:00 AM  |
| Tyrannidae | <i>Contopus</i>       | <i>virens</i>        | (Linnaeus, 1766)     | Eastern Wood-pewee        | 12              | valley     | valley>3     | 2                     |             |
| Tyrannidae | <i>Contopus</i>       | <i>virens</i>        | (Linnaeus, 1766)     | Eastern Wood-pewee        | 14              | ridge      | ridge>3      | 1                     | 8:45:00 AM  |
| Tyrannidae | <i>Contopus</i>       | <i>virens</i>        | (Linnaeus, 1766)     | Eastern Wood-pewee        | 14              | valley     | valley>3     | 1                     | 6:30:00 AM  |
| Tyrannidae | <i>Hemitriccus</i>    | <i>zosterops</i>     | (Pelzeln, 1868)      | White-eyed Tody-tyrant    | 8               | ridge      | ridge>3      | 1                     | 9:15:00 AM  |
| Tyrannidae | <i>Legatus</i>        | <i>leucophaeus</i>   | (Vieillot, 1818)     | Piratic Flycatcher        | 12              | valley     | valley>3     | 2                     | 8:08:00 AM  |
| Tyrannidae | <i>Megarynchus</i>    | <i>pitangua</i>      | (Linnaeus, 1766)     | Boat-billed Flycatcher    | 15              | valley     | valley>3     | 2                     | 8:00:00 AM  |
| Tyrannidae | <i>Mionectes</i>      | <i>oleagineus</i>    | (Lichtenstein, 1823) | Ochre-bellied Flycatcher  | 5               | ridge      | ridge>3      | 1                     | 8:00:00 AM  |
| Tyrannidae | <i>Mionectes</i>      | <i>oleagineus</i>    | (Lichtenstein, 1823) | Ochre-bellied Flycatcher  | 2               | valley     | valley2-3    | 1                     | 8:30:00 AM  |
| Tyrannidae | <i>Mionectes</i>      | <i>oleagineus</i>    | (Lichtenstein, 1823) | Ochre-bellied Flycatcher  | 2               | ridge      | ridge2-3     | 1                     | 12:50:00 PM |
| Tyrannidae | <i>Mionectes</i>      | <i>oleagineus</i>    | (Lichtenstein, 1823) | Ochre-bellied Flycatcher  | 8               | valley     | valley>3     | 1                     | 9:30:00 AM  |
| Tyrannidae | <i>Myiobius</i>       | <i>barbatus</i>      | (Gmelin, 1789)       | Sulphur-rumped Flycatcher | 12              | valley     | valley>3     | 2                     | 12:00:00 PM |
| Tyrannidae | <i>Myiobius</i>       | <i>barbatus</i>      | (Gmelin, 1789)       | Sulphur-rumped Flycatcher | 5               | valley     | valley>3     | 1                     | 9:15:00 AM  |
| Tyrannidae | <i>Myiobius</i>       | <i>barbatus</i>      | (Gmelin, 1789)       | Sulphur-rumped Flycatcher | 5               | valley     | valley>3     | 1                     | 6:15:00 AM  |
| Tyrannidae | <i>Myiobius</i>       | <i>barbatus</i>      | (Gmelin, 1789)       | Sulphur-rumped Flycatcher | 2               | ridge      | ridge2-3     | 1                     | 3:38:00 PM  |
| Tyrannidae | <i>Myiobius</i>       | <i>barbatus</i>      | (Gmelin, 1789)       | Sulphur-rumped Flycatcher | 12              | valley     | valley>3     | 1                     | 8:10:00 AM  |
| Tyrannidae | <i>Myiobius</i>       | <i>barbatus</i>      | (Gmelin, 1789)       | Sulphur-rumped Flycatcher | 4               | ridge      | ridge>3      | 1                     | 1:30:00 PM  |
| Tyrannidae | <i>Myiobius</i>       | <i>barbatus</i>      | (Gmelin, 1789)       | Sulphur-rumped Flycatcher | 2               | valley     | valley2-3    | 1                     | 1:40:00 PM  |
| Tyrannidae | <i>Myiopagis</i>      | <i>gaimardii</i>     | (D'Orbigny, 1840)    | Forest Elaenia            | 18              | valley     | valley>3     | 4                     | 7:46:00 AM  |
| Tyrannidae | <i>Myiozetetes</i>    | <i>granadensis</i>   | Lawrence, 1862       | Gray-capped Flycatcher    | 14              | valley     | valley>3     | 2                     | 8:00:00 AM  |
| Tyrannidae | <i>Onychorhynchus</i> | <i>coronatus</i>     | (Müller, 1776)       | Royal Flycatcher          | 18              | valley     | valley>3     | 1                     | 8:30:00 AM  |
| Tyrannidae | <i>Onychorhynchus</i> | <i>coronatus</i>     | (Müller, 1776)       | Royal Flycatcher          | 20              | ridge      | ridge>3      | 2                     | 8:10:00 AM  |
| Tyrannidae | <i>Platyrinchus</i>   | <i>flavigularis</i>  | Sclater, 1862        | Yellow-throated Spadebill | 14              | ridge      | ridge>3      | 1                     | 7:25:00 AM  |
| Tyrannidae | <i>Tolmomyias</i>     | <i>poliocephalus</i> | (Taczanowski, 1884)  | Gray-crowned Flycatcher   | 6               | ridge      | ridge>3      | 1                     | 12:40:00 PM |
| Tyrannidae | <i>Tyrannulus</i>     | <i>elatus</i>        | (Latham, 1790)       | Yellow-crowned Tyrannulet | 9               | ridge      | ridge>3      | 1                     | 1:15:00 PM  |
| Tyrannidae | <i>Tyrannus</i>       | <i>melancholicus</i> | Vieillot, 1819       | Tropical Kingbird         | 18              | ridge      | ridge>3      | 1                     | 6:15:00 AM  |
| Tyrannidae | <i>Zimmerius</i>      | <i>chrysops</i>      | (Sclater, 1859)      | Golden-faced Tyrannulet   | 8               | ridge      | ridge>3      | 1                     | 8:15:00 AM  |

#### S4. Butterfly abundance in eight mimicry patterns across eight microhabitats.

| Mimicry pattern | ridge0-1 | ridge1-2 | ridge2-3 | ridge>3 | valley0-1 | valley1-2 | valley2-3 | valley>3 | Total across all microhabitats |
|-----------------|----------|----------|----------|---------|-----------|-----------|-----------|----------|--------------------------------|
| agnosia         | 0        | 2        | 0        | 0       | 10        | 1         | 0         | 0        | 13                             |
| aureliana       | 8        | 6        | 0        | 0       | 21        | 23        | 2         | 1        | 61                             |
| confusa         | 1        | 5        | 2        | 3       | 1         | 1         | 2         | 0        | 15                             |
| eurimedia       | 23       | 18       | 5        | 0       | 88        | 90        | 11        | 6        | 241                            |
| hermias         | 23       | 46       | 15       | 15      | 30        | 59        | 11        | 4        | 203                            |
| lerida          | 10       | 5        | 0        | 0       | 65        | 10        | 1         | 0        | 91                             |
| mamercus        | 2        | 4        | 0        | 0       | 4         | 5         | 3         | 0        | 18                             |
| mothone         | 2        | 2        | 1        | 3       | 2         | 3         | 0         | 1        | 14                             |
| Total           | 69       | 88       | 23       | 21      | 221       | 192       | 30        | 12       | 656                            |

**S5. Results of the permutation test comparing empirical estimated relative encounter rates of eight mimicry patterns for most abundant 25 bird species with those in 500 permuted datasets (H1).**

| Bird species              | Number of bird individuals observed | Relative mimicry pattern encounter rate ( $M_{ik}$ ) |           |         |           |         |        |          |         | Pattern with highest relative encounter rate | H1           |
|---------------------------|-------------------------------------|------------------------------------------------------|-----------|---------|-----------|---------|--------|----------|---------|----------------------------------------------|--------------|
|                           |                                     | agnosia                                              | aureliana | confusa | eurimedia | hermias | lerida | mamercus | mothone |                                              |              |
| Russet-backed Oropendola  | 94                                  | 0.01                                                 | 0.04      | 0.08    | 0.18      | 0.57    | 0.01   | 0.01     | 0.10    | hermias                                      | <b>0</b>     |
| Yellow-rumped Cacique     | 57                                  | 0.00                                                 | 0.02      | 0.09    | 0.18      | 0.60    | 0.00   | 0.00     | 0.11    | hermias                                      | <b>0</b>     |
| White-fronted Nunbird     | 44                                  | 0.00                                                 | 0.01      | 0.11    | 0.11      | 0.65    | 0.00   | 0.00     | 0.12    | hermias                                      | <b>0</b>     |
| Wedge-billed Woodcreeper  | 32                                  | 0.01                                                 | 0.07      | 0.05    | 0.28      | 0.42    | 0.09   | 0.03     | 0.04    | hermias                                      | <b>0</b>     |
| Black-fronted Nunbird     | 29                                  | 0.00                                                 | 0.07      | 0.02    | 0.42      | 0.40    | 0.00   | 0.00     | 0.09    | eurimedia                                    | 0.32         |
| Spot-winged Antbird       | 25                                  | 0.02                                                 | 0.09      | 0.02    | 0.39      | 0.28    | 0.16   | 0.02     | 0.02    | eurimedia                                    | <b>0.026</b> |
| Plain-winged Antshrike    | 23                                  | 0.00                                                 | 0.03      | 0.10    | 0.18      | 0.56    | 0.02   | 0.03     | 0.08    | hermias                                      | <b>0</b>     |
| Amazonian Motmot          | 20                                  | 0.00                                                 | 0.04      | 0.07    | 0.26      | 0.52    | 0.00   | 0.00     | 0.11    | hermias                                      | <b>0.006</b> |
| Green Oropendola          | 20                                  | 0.00                                                 | 0.06      | 0.04    | 0.35      | 0.45    | 0.00   | 0.00     | 0.10    | hermias                                      | 0.09         |
| Buff-throated Woodcreeper | 19                                  | 0.02                                                 | 0.07      | 0.04    | 0.33      | 0.37    | 0.11   | 0.01     | 0.05    | hermias                                      | <b>0.002</b> |
| Green-and-gold Tanager    | 18                                  | 0.00                                                 | 0.06      | 0.04    | 0.37      | 0.43    | 0.00   | 0.00     | 0.10    | hermias                                      | 0.15         |
| Rufous Motmot             | 18                                  | 0.00                                                 | 0.01      | 0.12    | 0.07      | 0.66    | 0.00   | 0.00     | 0.13    | hermias                                      | <b>0</b>     |
| Black-faced Antbird       | 16                                  | 0.00                                                 | 0.11      | 0.02    | 0.35      | 0.36    | 0.10   | 0.03     | 0.03    | hermias                                      | 0.092        |
| Thrush-like Wren          | 16                                  | 0.01                                                 | 0.02      | 0.11    | 0.10      | 0.63    | 0.01   | 0.01     | 0.11    | hermias                                      | <b>0</b>     |
| Golden-headed Manakin     | 16                                  | 0.00                                                 | 0.00      | 0.14    | 0.00      | 0.71    | 0.00   | 0.00     | 0.14    | hermias                                      | <b>0</b>     |
| Dusky-throated Antshrike  | 16                                  | 0.02                                                 | 0.09      | 0.03    | 0.33      | 0.30    | 0.17   | 0.03     | 0.02    | eurimedia                                    | 0.984        |
| Scaly-breasted Wren       | 15                                  | 0.01                                                 | 0.07      | 0.06    | 0.29      | 0.48    | 0.03   | 0.02     | 0.05    | hermias                                      | <b>0</b>     |
| Green-backed Trogon       | 14                                  | 0.00                                                 | 0.02      | 0.11    | 0.12      | 0.62    | 0.00   | 0.00     | 0.13    | hermias                                      | <b>0</b>     |
| White-flanked Antwren     | 13                                  | 0.03                                                 | 0.08      | 0.03    | 0.37      | 0.24    | 0.19   | 0.04     | 0.02    | eurimedia                                    | 0.438        |
| Spot-backed Antbird       | 13                                  | 0.03                                                 | 0.10      | 0.01    | 0.39      | 0.24    | 0.19   | 0.02     | 0.02    | eurimedia                                    | <b>0.016</b> |
| Purple-throated Fruitcrow | 12                                  | 0.00                                                 | 0.08      | 0.00    | 0.50      | 0.33    | 0.00   | 0.00     | 0.08    | eurimedia                                    | 0.29         |
| Paradise Tanager          | 12                                  | 0.00                                                 | 0.05      | 0.05    | 0.32      | 0.47    | 0.00   | 0.00     | 0.11    | hermias                                      | <b>0.04</b>  |
| Blue-crowned Manakin      | 11                                  | 0.01                                                 | 0.04      | 0.09    | 0.19      | 0.57    | 0.02   | 0.03     | 0.06    | hermias                                      | <b>0</b>     |
| Violaceous Jay            | 11                                  | 0.00                                                 | 0.02      | 0.11    | 0.12      | 0.62    | 0.00   | 0.00     | 0.13    | hermias                                      | <b>0</b>     |
| Red-billed Scythebill     | 10                                  | 0.00                                                 | 0.02      | 0.11    | 0.15      | 0.59    | 0.01   | 0.03     | 0.09    | hermias                                      | <b>0</b>     |

H1 = Test H1, probability of exceeding the highest empirical estimated relative encounter rate ( $M_{ik}$ ) in 500 permuted datasets.

**S6.** Weighted average mimicry pattern encounter rates ( $\overline{M}_{hi}$ ) for birds co-occurring with butterfly species. The predicted optimal pattern is that with the highest M, representing that with which birds encountering a given butterfly species are most familiar and therefore most likely to avoid.

| Butterfly species             | Weighted average mimicry encounter rates of birds encountered by butterflies ( $\overline{M}_{hi}$ ) |           |         |           |         |        |          |         | Actual mimicry pattern | Predicted optimal mimicry pattern | Butterfly abundance in surveys |
|-------------------------------|------------------------------------------------------------------------------------------------------|-----------|---------|-----------|---------|--------|----------|---------|------------------------|-----------------------------------|--------------------------------|
|                               | agnosia                                                                                              | aureliana | confusa | eurimedia | hermias | lerida | mamercus | mothone |                        |                                   |                                |
| <i>Pseudoscada timna</i>      | 0.03                                                                                                 | 0.09      | 0.02    | 0.36      | 0.27    | 0.18   | 0.02     | 0.02    | agnosia                | eurimedia                         | 13                             |
| <i>Brevioleria arzalia</i>    | 0.02                                                                                                 | 0.09      | 0.03    | 0.35      | 0.32    | 0.14   | 0.03     | 0.03    | aureliana              | eurimedia                         | 4                              |
| <i>Ithomiola floralis</i>     | 0.01                                                                                                 | 0.10      | 0.02    | 0.37      | 0.31    | 0.14   | 0.03     | 0.02    | aureliana              | eurimedia                         | 2                              |
| <i>Pseudoscada florula</i>    | 0.02                                                                                                 | 0.09      | 0.02    | 0.36      | 0.29    | 0.16   | 0.03     | 0.02    | aureliana              | eurimedia                         | 17                             |
| <i>Hypoleria alema</i>        | 0.02                                                                                                 | 0.09      | 0.03    | 0.37      | 0.31    | 0.14   | 0.03     | 0.03    | aureliana              | eurimedia                         | 18                             |
| <i>Brevioleria seba</i>       | 0.02                                                                                                 | 0.09      | 0.02    | 0.36      | 0.28    | 0.17   | 0.03     | 0.02    | aureliana              | eurimedia                         | 2                              |
| <i>Napeogenes sylphis</i>     | 0.02                                                                                                 | 0.09      | 0.02    | 0.37      | 0.29    | 0.15   | 0.02     | 0.03    | aureliana              | eurimedia                         | 15                             |
| <i>Dismorphia theucarilla</i> | 0.01                                                                                                 | 0.10      | 0.02    | 0.37      | 0.31    | 0.14   | 0.03     | 0.02    | aureliana              | eurimedia                         | 2                              |
| <i>Methona curvifascia</i>    | 0.01                                                                                                 | 0.07      | 0.05    | 0.29      | 0.41    | 0.09   | 0.03     | 0.04    | confusa                | hermias                           | 2                              |
| <i>Methona grandior</i>       | 0.00                                                                                                 | 0.03      | 0.10    | 0.14      | 0.60    | 0.01   | 0.01     | 0.11    | confusa                | hermias                           | 2                              |
| <i>Callithomia lenea</i>      | 0.02                                                                                                 | 0.07      | 0.05    | 0.29      | 0.40    | 0.11   | 0.02     | 0.05    | confusa                | hermias                           | 7                              |
| <i>Thyridia psidii</i>        | 0.01                                                                                                 | 0.05      | 0.06    | 0.27      | 0.46    | 0.07   | 0.02     | 0.06    | confusa                | hermias                           | 1                              |
| <i>Ithomia amarilla</i>       | 0.02                                                                                                 | 0.09      | 0.02    | 0.38      | 0.27    | 0.17   | 0.02     | 0.02    | eurimedia              | eurimedia                         | 76                             |
| <i>Aeria eurimedia</i>        | 0.02                                                                                                 | 0.09      | 0.02    | 0.36      | 0.29    | 0.17   | 0.03     | 0.02    | eurimedia              | eurimedia                         | 8                              |
| <i>Napeogenes inachia</i>     | 0.02                                                                                                 | 0.09      | 0.02    | 0.37      | 0.30    | 0.14   | 0.02     | 0.03    | eurimedia              | eurimedia                         | 36                             |
| <i>Itaballia pandosia</i>     | 0.01                                                                                                 | 0.10      | 0.02    | 0.35      | 0.32    | 0.14   | 0.03     | 0.03    | eurimedia              | eurimedia                         | 1                              |
| <i>Napeogenes pharo</i>       | 0.02                                                                                                 | 0.08      | 0.03    | 0.36      | 0.34    | 0.11   | 0.02     | 0.04    | eurimedia              | eurimedia                         | 6                              |
| <i>Moschoneura pinthous</i>   | 0.02                                                                                                 | 0.10      | 0.02    | 0.37      | 0.28    | 0.16   | 0.03     | 0.02    | eurimedia              | eurimedia                         | 18                             |
| <i>Pteronymia primula</i>     | 0.02                                                                                                 | 0.09      | 0.03    | 0.35      | 0.32    | 0.14   | 0.03     | 0.03    | eurimedia              | eurimedia                         | 7                              |
| <i>Ithomia salapia</i>        | 0.02                                                                                                 | 0.09      | 0.02    | 0.37      | 0.27    | 0.17   | 0.03     | 0.02    | eurimedia              | eurimedia                         | 10                             |
| <i>Espicada sulphurea</i>     | 0.01                                                                                                 | 0.07      | 0.05    | 0.26      | 0.44    | 0.09   | 0.03     | 0.05    | eurimedia              | hermias                           | 1                              |
| <i>Pteronymia vestilla</i>    | 0.01                                                                                                 | 0.07      | 0.05    | 0.26      | 0.44    | 0.09   | 0.03     | 0.05    | eurimedia              | hermias                           | 2                              |
| <i>Godyrus zavaleta</i>       | 0.02                                                                                                 | 0.09      | 0.03    | 0.36      | 0.33    | 0.13   | 0.03     | 0.03    | eurimedia              | eurimedia                         | 65                             |
| <i>Scada zibia</i>            | 0.02                                                                                                 | 0.09      | 0.02    | 0.36      | 0.29    | 0.17   | 0.03     | 0.02    | eurimedia              | eurimedia                         | 7                              |
| <i>Hypothyris anastasia</i>   | 0.01                                                                                                 | 0.06      | 0.06    | 0.27      | 0.46    | 0.06   | 0.02     | 0.07    | hermias                | hermias                           | 4                              |
| <i>Hyposcada anchiala</i>     | 0.02                                                                                                 | 0.09      | 0.03    | 0.35      | 0.32    | 0.14   | 0.03     | 0.03    | hermias                | eurimedia                         | 10                             |
| <i>Hypothyris euclea</i>      | 0.01                                                                                                 | 0.10      | 0.02    | 0.35      | 0.32    | 0.14   | 0.03     | 0.03    | hermias                | eurimedia                         | 1                              |
| <i>Eresia eunice</i>          | 0.01                                                                                                 | 0.09      | 0.03    | 0.32      | 0.36    | 0.12   | 0.03     | 0.03    | hermias                | hermias                           | 3                              |
| <i>Hypothyris fluonia</i>     | 0.02                                                                                                 | 0.07      | 0.05    | 0.29      | 0.40    | 0.10   | 0.03     | 0.04    | hermias                | hermias                           | 17                             |
| <i>Lycorea halia</i>          | 0.00                                                                                                 | 0.03      | 0.10    | 0.14      | 0.60    | 0.01   | 0.01     | 0.11    | hermias                | hermias                           | 1                              |
| <i>Tithorea harmonia</i>      | 0.01                                                                                                 | 0.07      | 0.04    | 0.32      | 0.38    | 0.11   | 0.02     | 0.04    | hermias                | hermias                           | 9                              |
| <i>Heliconius hecale</i>      | 0.00                                                                                                 | 0.03      | 0.10    | 0.14      | 0.60    | 0.01   | 0.01     | 0.11    | hermias                | hermias                           | 1                              |
| <i>Napeogenes aethra</i>      | 0.02                                                                                                 | 0.08      | 0.04    | 0.32      | 0.34    | 0.14   | 0.02     | 0.04    | hermias                | hermias                           | 4                              |
| <i>Mechanitis lysimnia</i>    | 0.02                                                                                                 | 0.07      | 0.04    | 0.30      | 0.38    | 0.12   | 0.02     | 0.04    | hermias                | hermias                           | 3                              |
| <i>Mechanitis mazaesus</i>    | 0.01                                                                                                 | 0.08      | 0.04    | 0.30      | 0.39    | 0.11   | 0.03     | 0.04    | hermias                | hermias                           | 27                             |
| <i>Hypothyris moebiusi</i>    | 0.02                                                                                                 | 0.10      | 0.02    | 0.39      | 0.30    | 0.13   | 0.03     | 0.02    | hermias                | eurimedia                         | 1                              |
| <i>Heliconius numata</i>      | 0.01                                                                                                 | 0.05      | 0.07    | 0.23      | 0.48    | 0.06   | 0.02     | 0.07    | hermias                | hermias                           | 4                              |
| <i>Forbestra olivencia</i>    | 0.02                                                                                                 | 0.08      | 0.04    | 0.30      | 0.38    | 0.12   | 0.03     | 0.04    | hermias                | hermias                           | 9                              |
| <i>Lycorea pasinuntia</i>     | 0.02                                                                                                 | 0.06      | 0.06    | 0.26      | 0.42    | 0.10   | 0.02     | 0.06    | hermias                | hermias                           | 3                              |
| <i>Eresia pelonia</i>         | 0.01                                                                                                 | 0.08      | 0.04    | 0.31      | 0.38    | 0.11   | 0.03     | 0.04    | hermias                | hermias                           | 6                              |
| <i>Mechanitis polymnia</i>    | 0.02                                                                                                 | 0.10      | 0.02    | 0.39      | 0.30    | 0.13   | 0.03     | 0.02    | hermias                | eurimedia                         | 2                              |
| <i>Melinaea satevis</i>       | 0.02                                                                                                 | 0.08      | 0.03    | 0.34      | 0.33    | 0.14   | 0.02     | 0.03    | hermias                | eurimedia                         | 9                              |
| <i>Hypothyris semifulva</i>   | 0.02                                                                                                 | 0.09      | 0.02    | 0.37      | 0.30    | 0.14   | 0.03     | 0.02    | hermias                | eurimedia                         | 55                             |
| <i>Ceratinia tutia</i>        | 0.01                                                                                                 | 0.07      | 0.05    | 0.30      | 0.40    | 0.10   | 0.02     | 0.05    | hermias                | hermias                           | 26                             |
| <i>Hyaliris n. sp.</i>        | 0.01                                                                                                 | 0.06      | 0.05    | 0.32      | 0.42    | 0.06   | 0.02     | 0.06    | hermias                | hermias                           | 2                              |
| <i>Oleria agarista</i>        | 0.01                                                                                                 | 0.10      | 0.02    | 0.35      | 0.32    | 0.14   | 0.03     | 0.03    | lerida                 | eurimedia                         | 1                              |
| <i>Oleria assimilis</i>       | 0.03                                                                                                 | 0.09      | 0.02    | 0.38      | 0.23    | 0.21   | 0.02     | 0.02    | lerida                 | eurimedia                         | 2                              |
| <i>Oleria gunilla</i>         | 0.03                                                                                                 | 0.09      | 0.02    | 0.38      | 0.25    | 0.19   | 0.02     | 0.02    | lerida                 | eurimedia                         | 37                             |
| <i>Hyposcada illinissa</i>    | 0.02                                                                                                 | 0.09      | 0.02    | 0.36      | 0.27    | 0.18   | 0.03     | 0.02    | lerida                 | eurimedia                         | 19                             |
| <i>Oleria onega</i>           | 0.02                                                                                                 | 0.09      | 0.03    | 0.35      | 0.30    | 0.16   | 0.03     | 0.03    | lerida                 | eurimedia                         | 15                             |
| <i>Oleria sexmaculata</i>     | 0.03                                                                                                 | 0.09      | 0.02    | 0.38      | 0.23    | 0.21   | 0.02     | 0.02    | lerida                 | eurimedia                         | 2                              |
| <i>Dismorphia theucarilla</i> | 0.03                                                                                                 | 0.09      | 0.02    | 0.38      | 0.25    | 0.19   | 0.02     | 0.02    | lerida                 | eurimedia                         | 15                             |
| <i>Napeogenes rhezia</i>      | 0.03                                                                                                 | 0.09      | 0.02    | 0.38      | 0.23    | 0.21   | 0.02     | 0.02    | mamercus               | eurimedia                         | 1                              |
| <i>Napeogenes duessa</i>      | 0.01                                                                                                 | 0.08      | 0.04    | 0.32      | 0.38    | 0.11   | 0.03     | 0.04    | mamercus               | hermias                           | 5                              |
| <i>Eueides lampeto</i>        | 0.01                                                                                                 | 0.07      | 0.05    | 0.26      | 0.44    | 0.09   | 0.03     | 0.05    | mamercus               | hermias                           | 1                              |
| <i>Perrhybris lorena</i>      | 0.03                                                                                                 | 0.09      | 0.02    | 0.38      | 0.23    | 0.21   | 0.02     | 0.02    | mamercus               | eurimedia                         | 1                              |
| <i>Hypothyris mamercus</i>    | 0.02                                                                                                 | 0.08      | 0.03    | 0.35      | 0.31    | 0.15   | 0.03     | 0.03    | mamercus               | eurimedia                         | 2                              |
| <i>Melinaea marsaeus</i>      | 0.02                                                                                                 | 0.10      | 0.02    | 0.39      | 0.30    | 0.13   | 0.03     | 0.02    | mamercus               | eurimedia                         | 1                              |
| <i>Melinaea menophilus</i>    | 0.02                                                                                                 | 0.10      | 0.02    | 0.39      | 0.30    | 0.13   | 0.03     | 0.02    | mamercus               | eurimedia                         | 3                              |
| <i>Mechanitis messenoides</i> | 0.02                                                                                                 | 0.09      | 0.03    | 0.35      | 0.31    | 0.15   | 0.03     | 0.03    | mamercus               | eurimedia                         | 3                              |
| <i>Heliconius numata</i>      | 0.01                                                                                                 | 0.07      | 0.05    | 0.26      | 0.44    | 0.09   | 0.03     | 0.05    | mamercus               | eurimedia                         | 1                              |
| <i>Melinaea marsaeus</i>      | 0.02                                                                                                 | 0.10      | 0.02    | 0.39      | 0.30    | 0.13   | 0.03     | 0.02    | mothone                | hermias                           | 2                              |
| <i>Mechanitis messenoides</i> | 0.02                                                                                                 | 0.08      | 0.04    | 0.30      | 0.37    | 0.13   | 0.02     | 0.04    | mothone                | eurimedia                         | 7                              |
| <i>Heliconius numata</i>      | 0.01                                                                                                 | 0.08      | 0.04    | 0.33      | 0.38    | 0.10   | 0.02     | 0.04    | mothone                | hermias                           | 2                              |

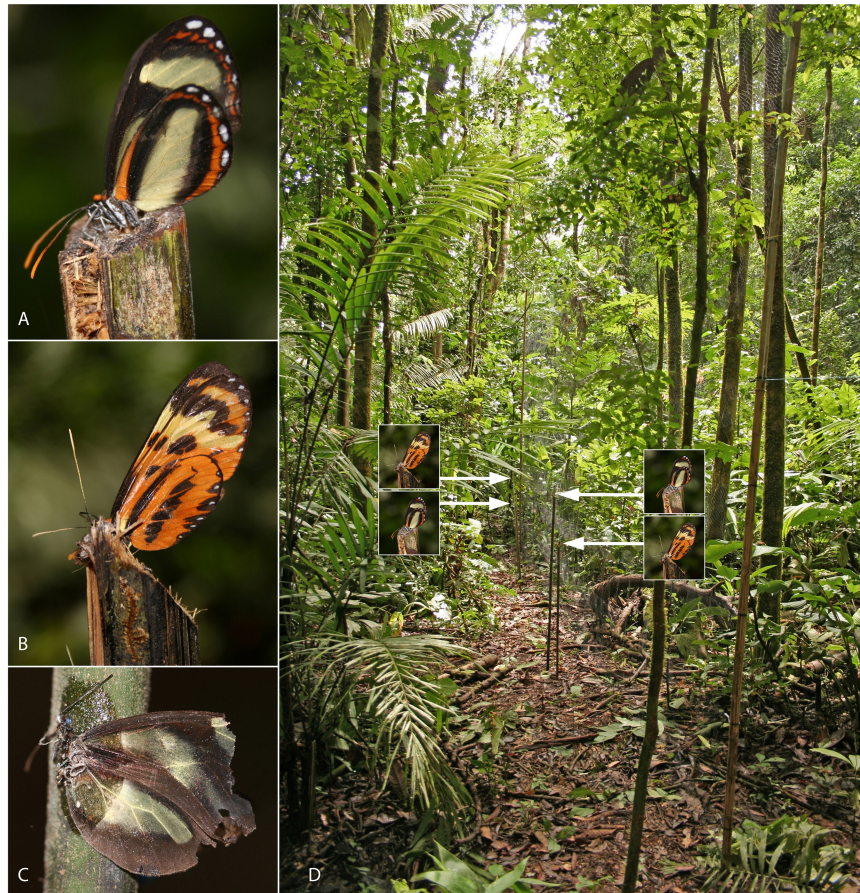

S7. Field predation study. A. Example of a 'eurimedia' pattern butterfly (*Napeogenes inachia*). B. Example of a 'hermias' pattern butterfly (*Mechanitis mazaesus*). C. Predated 'eurimedia' pattern butterfly (*Pteronymia primula*). D. Valley study site, with four butterflies, two 'eurimedia' and two 'hermias'.

## S8. Maximum likelihood approach for comparing predation probabilities between wing patterns and microhabitats.

We used a maximum likelihood approach to estimate the probability of predation of a particular mimicry pattern in a particular microhabitat, and to assess the significance of differences in predation probabilities. For example, to compare predation rates on mimicry patterns in ridge sites, we calculated the total likelihood of the observed predation results in ridge sites given two parameters, the probability of predation of 'eurimedia' on ridges and the probability of predation of 'hermias' on ridges. Let  $H_i$  and  $E_i$  respectively be the numbers of 'hermias' and 'eurimedia' eaten in ridge sites at check  $i$ ; and  $H_{total}$  and  $E_{total}$  respectively be the total numbers of 'hermias' and 'eurimedia' in ridge sites. Let  $P_H$  and  $P_E$  respectively be the predation probabilities of a 'hermias' and a 'eurimedia' butterfly on ridges. For each check  $i$  in ridge sites, the likelihood function is:

$$L_i = \binom{H_{total}}{H_i} * \binom{E_{total}}{E_i} * P_H^{H_i} * (1 - P_H)^{(H_{total} - H_i)} * P_E^{E_i} * (1 - P_E)^{(E_{total} - E_i)}$$

The total likelihood across all ridge checks is therefore:

$$L_{ridge} = \prod L_i = \prod \left( \binom{H_{total}}{H_i} * \binom{E_{total}}{E_i} * P_H^{H_i} * (1 - P_H)^{(H_{total} - H_i)} * P_E^{E_i} * (1 - P_E)^{(E_{total} - E_i)} \right)$$

And the corresponding log-likelihood is:

$$\log(L_{ridge}) = \sum \left[ \log \binom{H_{total}}{H_i} + \log \binom{E_{total}}{E_i} + H_i * \log(P_H) + (H_{total} - H_i) * \log(1 - P_H) + E_i * \log(P_E) + (E_{total} - E_i) * \log(1 - P_E) \right]$$

We calculated the values of  $P_H$  and  $P_E$  that maximized the log-likelihood functions, and we computed the corresponding maximum log-likelihood value. Next, we calculated the maximum log-likelihood under the assumption that these predation probabilities were the same (the null hypothesis) and compared that to the maximum log-likelihood where predation probabilities were allowed to differ. A likelihood ratio test was used to test for the significance of the difference between the two log-likelihood scores, with  $df=1$ . We conducted similar analyses to compare predation rates on 'eurimedia' and 'hermias' in valleys, and predation rates on each of 'eurimedia' and 'hermias' between ridges and valleys.
